# Supplementary material for: Genome-wide identification of RING finger genes in flax (Linum usitatissimum) and analyses of their evolution
Source: PeerJ. 2021 Nov 15;9:e12491. doi: 10.7717/peerj.12491 (PMC8601054; doi:10.7717/peerj.12491)
Supplement: Supplemental Information 12 [file peerj-09-12491-s012.xls]

## Sheet: Table S1
Table S1. Information of 574 RING finger genes in flax
NO.	Gene Name	Transcript Name	RING type	RING domain type	Length(RING domain)	RING domain sequence	Length(AA)	Chromosome Name	Strand	Gene Start (bp)	Gene End (bp)
1	Lus10000023.g	Lus10000023	HH	HH	41	CAVCKEPFQLDSEAREMPCKHIYHSDCILPWLSLRNSCPIC	200	C8186631	1	9	611
2	Lus10000333.g	Lus10000333	HH	HH	42	CAVCLNEFDDDEMLRLIPKCDHVFHPECIDAWLESHTTCPVC	396	scaffold3845	1	15273	16463
3	Lus10000412.g	Lus10000412	HC	HC	52	CEICAERKEPEHMLKIGGGCSHASYCSDCISRHVTTKVSDSVVTVTCPAAGC	345	scaffold4420	1	4718	6155
4	Lus10000487.g	Lus10000487	HH	HH	42	CAICLVEFEEDDLLRVVIMCYHAFHPDCIDLWLRSHKTCPVC	313	scaffold2945	1	33794	34735
5	Lus10000513.g	Lus10000513	HH	HH	41	CSVCLEQVDVGEVIRTLPCLHQFHAICIDPWLRQQGTCPVC	277	scaffold2212	-1	5284	7625
6	Lus10000533.g	Lus10000533	HC	HC	40	CVICLARRRRSAFIPCGHLVCCQYCAISVERDASPKCPLC	364	scaffold236	-1	30936	33837
7	Lus10000710.g	Lus10000710	HH	HH	42	CVVCLNDFHEHDVLRVLPNCAHSFHLDCIDVWLHSNSNCPIC	328	scaffold2174	-1	41931	43346
8	Lus10000845.g	Lus10000845	CC	CC	52	CHQCRQKTLGHRTRCSECQMVQGQFCGDCLYMRYGEHVLEALENPNWTCPVC	423	scaffold3265	1	51357	53888
9	Lus10000885.g	Lus10000885	HH	HH	42	CAVCLSSFEELEYIRLLPTCNHSFHLPCIDMWLYSHLYCPLC	111	scaffold643	1	30991	31326
10	Lus10000899.g	Lus10000899	HC	HC	40	CVICMKEEVSMLFLPCAHKVMCAMCNDNYGKKGKATCPCC	408	scaffold381	-1	22811	24668
11	Lus10000908.g	Lus10000908	HC	HC	50	CCICFSEHPGGDFIKLSCKHFFCRNCMKSYSNIHVSEGTVYKLQCPEAKC	621	scaffold381	-1	51921	54475
12	Lus10000996.g	Lus10000996	HC	HC	38	CAICQEKMHAPILLRCKHIFCEDCVSEWFERERTCPLC	468	scaffold2096	-1	6328	9220
13	Lus10001131.g	Lus10001131	HC	HC	35	CKVCRVKEVCMLLLPCKHLCLCKECESKLSFCPLC	342	scaffold1100	1	59917	68582
14	Lus10001209.g	Lus10001209	HC	HC	38	CGICMEMNPKFVLPDCNHSMCLKCFRDWRGRSESCPFC	236	scaffold728	-1	52411	53475
15	Lus10001421.g	Lus10001421	HH	HH	41	CAVCLEDFEAKEEVMVTHCDHMFHGDCIVPWVKTNGNCPVC	492	scaffold85	-1	46350	49494
16	Lus10001530.g	Lus10001530	HC	HC	34	CRVCLSNEVDMTIVPCGHVLCRRCSSAVSRCPFC	4872	scaffold1045	-1	30842	49563
17	Lus10001535.g	Lus10001535	HC	HC	39	CGICMDFIIDRGVLDYCQHWFCFGCIDNWASITNLCPLC	366	scaffold1045	1	77559	80245
18	Lus10001568.g	Lus10001568	HH	HH	41	CTICLDQVNGGELVRSLPCLHQFHTNCIDRWLRQQGTCPVC	280	scaffold3460	1	51348	52926
19	Lus10001582.g	Lus10001582	HH	HH	41	CPVCKDEFELGSEARQMPCNHIYHTDCIVPWLVQHNSCPVC	193	scaffold2796	-1	14852	15433
20	Lus10001611.g	Lus10001611	HH	HH	41	CPVCKEEFKMGEEAREMLCHHLYHSNCIVPWLTMHNTCPVC	294	scaffold1025	1	36646	37962
21	Lus10001654.g	Lus10001654	HH	HH	42	CTICLQDIGKGEVARSLPKCQHSFHMACVDKWLVRHGSCPVC	245	scaffold2252	-1	86668	87728
22	Lus10001683.g	Lus10001683	HH	HH	42	CYICLSEYEEGDKIRVLPCHHEYHMSCVDKWLKEIHGVCPLC	499	scaffold591	1	70564	72465
23	Lus10001685.g	Lus10001685	HH	HH	41	CPICIDAFKVEKQVVRLLCAHKFHTKCLLPWLLTNTHCPCC	203	scaffold591	-1	78216	79054
24	Lus10002051.g	Lus10002051	CC	CC	43	CHQCQRMTIRCTKCKTKRYCFPCIKRWYPKMAQYEVAAACPFC	645	scaffold752	1	34371	43369
25	Lus10002113.g	Lus10002113	HH	HH	41	CSICLDSFVEGDELIRLPCEHRFHSTCLDPWIRACGDCPYC	289	scaffold1052	-1	36136	37805
26	Lus10002131.g	Lus10002131	HH	HH	50	CCSCHAVLDEGSGETTRLGCMHVIHTNCLVSHVKSFPPHTAPAGYVCPSC	333	scaffold1052	-1	105696	108691
27	Lus10002194.g	Lus10002194	HH	HH	42	CAVCLSLLEEDEMVRSLPNCGHGFHAECVDKWLSCHTTCPIC	235	scaffold1010	-1	73317	74024
28	Lus10002282.g	Lus10002282	CH	CH	46	CRICHDEDEDTNMEVPCSCNGSLKYAHRKCIQRWCNEKGDTICEIC	272	scaffold2280	1	39094	41488
29	Lus10002316.g	Lus10002316	HH	HH	56	CMICKRDLAFTPEGPISVERNLPPVSVLACHHHFHSFCLERITPKEQAGEPPCIPC	726	scaffold120	1	71729	74519
30	Lus10002369.g	Lus10002369	HH	HH	41	CPICLEEFHVGNEVRGLPCAHNFHVECIDEWLRLNVKCPRC	211	scaffold2788	1	52283	53109
31	Lus10002391.g	Lus10002391	CC	CC	47	CHQCQRNDKGSVVRCTKCKTKRYCFPCIERWYPKMTHDEVAAACPFC	1096	scaffold1595	-1	47986	52977
32	Lus10002487.g	Lus10002487	HC	HC	39	CAICFDAPRDCFFLPCGHCVACFACGTRISEVSGTCPIC	504	scaffold1199	-1	38318	41363
33	Lus10002491.g	Lus10002491	HC	HC	38	CGICMENNTKVVLPKCSHSLCLKCYKTWRARSQSCPFC	244	scaffold1199	1	53854	55626
34	Lus10002554.g	Lus10002554	HH	HH	41	CVICQMGYKRGDKRMTLPCKHIYHASCGSKWLSINKACPIC	168	scaffold134	1	72974	74667
35	Lus10002584.g	Lus10002584	HC	HC	42	CPSCKVTLTNTVTLVALSSCGHVFCKKCADKFVAVDKVCLVC	304	scaffold1999	1	5213	6838
36	Lus10002637.g	Lus10002637	HH	HH	41	CAVCLEDFELGSEAKEMPCKHKFHEGCIHPWLELHSSCPVC	408	scaffold2083	-1	104619	106021
37	Lus10002639.g	Lus10002639	HH	HH	61	CGVCSKLLWQKSPWSSNRIMRGGVGDMPTAGVLHCAHVFHAECLEQVTPKTQVHDPPCPLC	1395	scaffold2083	-1	110861	118493
38	Lus10002679.g	Lus10002679	HH	HH	49	CCICSCALTKNTSSFRVRVFNCGHAAHLECGFLDTESSSKGSSLGCPVC	1935	scaffold1347	-1	50244	59141
39	Lus10002706.g	Lus10002706	HH	HH	41	CSVCLEQVDVGEVIRTLPCLHQFHAICIDPWLRQQGTCPVC	277	scaffold530	-1	82562	84761
40	Lus10002761.g	Lus10002761	HC	HC	36	CPVCRNAMYPPIHQCSNGHTLCSACKPRVHNRCPTC	352	scaffold2896	-1	122297	124023
41	Lus10002939.g	Lus10002939	CC	CC	46	CQICGDEIEITVDGELFVACNECAFPVCRPCYEYERREGTQACPQC	1097	scaffold1060	-1	56132	60975
42	Lus10002940.g	Lus10002940	CC	CC	46	CQICGDEIEITVDGELFVACNECAFPVCRPCYEYERREGTQACPQC	906	scaffold1060	1	65683	71195
43	Lus10003261.g	Lus10003261	HC	HC	41	CPLCNKLLRQATTISLCLHTFCRKCIYDLLSDEEVDTCPVC	471	scaffold885	-1	11608	14766
44	Lus10003400.g	Lus10003400	HH	HH	42	CSICLSDYNPKETVKTIPDCHHCFHAECIDEWLRLNGTCPIC	149	scaffold1068	-1	148730	149179
45	Lus10003473.g	Lus10003473	HC	HC	55	CPICWESFNVVENVPYVLWCGHTLCKNCIQGLQRAVVKLPTLPVQVPFFITCPWC	274	scaffold80	-1	89065	89889
46	Lus10003485.g	Lus10003485	HH	HH	45	CGICAHSVRSGQGTAIFTAECNHVFHFPCITSHFTKHHLLLCPVC	745	scaffold508	1	54859	57192
47	Lus10003525.g	Lus10003525	CC	CC	46	CQICGDEIEITVDGELFVACNECAFPVCRPCYEYERREGTQACPQC	687	scaffold144	-1	96463	102586
48	Lus10003526.g	Lus10003526	CC	CC	46	CQICGDEIEITVDGELFVACNECAFPVCRPCYEYERREGTQACPQC	1097	scaffold144	1	107562	112416
49	Lus10003551.g	Lus10003551	HC	HC	39	CIICWDAPVQGACVPCGHMAGCMACLSNIQAKKGDCPVC	219	scaffold669	-1	76260	76919
50	Lus10003617.g	Lus10003617	HH	HH	53	CAVCLSEFKEGELVRRLSCKHLFHRECVDEWVMMRRGRTEGGNYGFSSSCPLC	171	scaffold1099	-1	101926	102441
51	Lus10003698.g	Lus10003698	HH	HH	41	CPVCKDEFELGSEARQMPCNHIYHADCIVPWLVQHNSCPVC	296	scaffold1042	-1	75181	76071
52	Lus10003992.g	Lus10003992	HH	HH	41	CVVCKEEMEEGREVCEMPCGHLFHWSCILPWIINRNTCPTC	292	scaffold437	1	165369	166247
53	Lus10004001.g	Lus10004001	HC	HC	36	CPVCTNSMYPPIHQCQNGHTLCSTCKAMVHNRCPTC	323	scaffold1155	1	27551	29231
54	Lus10004058.g	Lus10004058	CH	CH	46	CRICHDEDEDTNMEVPCSCNGSLKYAHRKCIQRWCNEKGDTICEIC	260	scaffold808	-1	108723	110285
55	Lus10004162.g	Lus10004162	HC	HC	41	CNICFDLASDPVVTCCGHLFCWACLYRWLHLHSDAKECPIC	419	scaffold2404	-1	78988	80247
56	Lus10004246.g	Lus10004246	CC	CC	42	CPICCEDLDPTDSSFSPCTCGFRLCLFCHKRILEEDGRCPSC	350	scaffold122	-1	69983	71354
57	Lus10004419.g	Lus10004419	HC	HC	39	CVICMTEPMDTAVLPCRHMCMCSECAKELRIQSNKCPIC	396	scaffold288	-1	7058	9460
58	Lus10004460.g	Lus10004460	HH	HH	42	CAVCLNEFDDDETLRLIPKCDHVFHPECIDAWLESHTTCPVC	395	scaffold768	1	533	1720
59	Lus10004467.g	Lus10004467	HC	HC	49	CPICLGSFIQESYLDTCFHKFCFKCILQWSKVVAGKHSAAQSSVKCPLC	280	scaffold768	-1	30314	31702
60	Lus10004521.g	Lus10004521	HC	HC	41	CAVCADSLEWVCYGACGHREVCSTCVARLRFIIEDRRCCIC	814	scaffold406	-1	110142	113794
61	Lus10004557.g	Lus10004557	HC	HC	40	CVICMKEEVSVLFLPCAHKVMCAMCNDNYGKKGKATCPCC	410	scaffold48	-1	112171	113996
62	Lus10004568.g	Lus10004568	HC	HC	50	CCICFTELPGSSFVRLSCDHYYCWNCMKGFSYVHVSEGTLYKLRCPGSKC	474	scaffold48	-1	143257	146330
63	Lus10004569.g	Lus10004569	HC	HC CC	50 30	CCICFSEHPGSDFIKLSCKHFFCRSCMKSYSSIHVSEGTVYKLQCPEAKC CPICSMAISRTGGCNKMVCSYCGNCFCYAC	530	scaffold48	-1	146472	148560
64	Lus10004572.g	Lus10004572	HH	HH	42	CAICLVEFEEDDLLRLVIVCYHAFHPDCIDLWLRSHKTCPVC	317	scaffold48	-1	163280	164233
65	Lus10004636.g	Lus10004636	HH	HH	41	CAICLEVYDFENPKIYMQCMHYYHLSCAFEWMQRSATCPVC	131	scaffold183	1	72706	73649
66	Lus10004666.g	Lus10004666	HC	HC	55	CPICWESFNIVENVPYVLWCGHSLCQNCVLALQCTVWQFHAQHFKVPFLISCPWC	274	scaffold183	-1	197236	198060
67	Lus10004712.g	Lus10004712	HH	HH	41	CAVCKEPFELETEARQMPCKHLYHSDCILPWLSLRNSCPVC	367	scaffold1421	1	193786	194889
68	Lus10004813.g	Lus10004813	HC	HC	39	CAICFDAPRDCFFLPCGHCVACFACGTRIAEVSGTCPIC	495	scaffold426	-1	50930	54551
69	Lus10004821.g	Lus10004821	HC	HC	38	CGICMENNTKVVLPKCSHSLCLKCYKTWRARSQSCPFC	244	scaffold426	1	97105	98731
70	Lus10004977.g	Lus10004977	HH	HH	41	CTICLDQVSRGELVRSLPCLHQFHTNCIDQWLRQQGTCPVC	279	scaffold2786	-1	160733	162212
71	Lus10005084.g	Lus10005084	HH	HH	41	CPTCLEEYSPENPKIMTKCSHHFHLGCIYEWMERSDSCPIC	205	scaffold1311	-1	58545	60618
72	Lus10005111.g	Lus10005111	HH	HH	42	CPICCDDLFTSSATVRGLPCGHFMHSSCFQAYTVSHYVCPIC	1239	scaffold1311	1	203862	211591
73	Lus10005127.g	Lus10005127	HH	HH	48	CSICYEDLKPIVEDLQVISICGHVLHELCLQQWFEYCPGKKKYSCPVC	560	scaffold846	-1	120288	123421
74	Lus10005220.g	Lus10005220	HC	HC	55	CPICWESFNIVENVPYVLWCGHTLCKNCILGLQWAVVKFPTLPVQLPLFISCPWC	273	scaffold773	-1	7536	8357
75	Lus10005237.g	Lus10005237	HH	HH	40	CAICLVAAAGVIAAEMPCRHRFHSGCIASWLKRSRTCPLC	231	scaffold773	1	80829	81524
76	Lus10005275.g	Lus10005275	HH	HH	42	CSVCLGSVVEGSTVKELPNCKHLFHVECIDLWLGGSTNCPNC	147	scaffold109	1	55616	56059
77	Lus10005389.g	Lus10005389	HH	HH	42	CSICLADYRANDTLRCIPECNHCFHADCVDEWLRVTATCPLC	153	scaffold547	1	117318	117779
78	Lus10005617.g	Lus10005617	HH	HH	42	CAVCLDEIEADDPARMIPVCNHGYHLECADKWLSKHPFCPVC	119	scaffold1721	1	58849	59208
79	Lus10005754.g	Lus10005754	HC	HC	50	CAVCLERQCNVAAEGCGHELCVRCALYLCSTSNMPTEMSGQPGSIPCPLC	505	scaffold1036	-1	78879	81560
80	Lus10005814.g	Lus10005814	HH	HH	42	CVICLSEFAAGDRVKILPKCNHGFHVRCIDKWLGSHSSCPTC	222	scaffold24	1	208202	208870
81	Lus10005815.g	Lus10005815	HH	HH	42	CVICLSEFSAGDLIKVLPTCNHRFHVKCIDQWLGSHSSCPTC	218	scaffold24	1	213083	213739
82	Lus10005816.g	Lus10005816	HH	HH	42	CVICLSEFASGDFVKVLPTCNHGFHVKCIDQWLGDHSSCPTC	201	scaffold24	1	215071	215676
83	Lus10005817.g	Lus10005817	HH	HH	42	CVICLSEFATGDRVKILPKCNHGFHVKCIDRWLGSHSSCPTC	243	scaffold24	-1	221393	222124
84	Lus10005818.g	Lus10005818	HH	HH	42	CVICLSEFVSGDRVKILPKCNHGFHVKCIDKWLGDHSSCPTC	161	scaffold24	-1	225027	225512
85	Lus10005859.g	Lus10005859	HC	HC	38	CGICMEMNQKFVLPDCNHSMCLKCFRDWRGRSESCPFC	232	scaffold1158	1	32324	33380
86	Lus10005954.g	Lus10005954	HH	HH	42	CAICLCEFEEGEELKTLPECMHSFHVGCIDMWLYSHSNCPMC	368	scaffold422	1	173298	176848
87	Lus10006074.g	Lus10006074	HH	HH	42	CAICLEDYSVGEKIRILPCRHKFHAFCVDSWLTTWRTFCPVC	455	scaffold821	1	138607	140656
88	Lus10006161.g	Lus10006161	CC	CC	46	CQICGDEIEITADGELFVACNECAFPVCRPCYEYERREGTQACPQC	1074	scaffold779	-1	52239	57356
89	Lus10006253.g	Lus10006253	HC	HC	38	CGICLEPCTKMVLPNCCHAMCIKCYRNWNTRSESCPFC	259	scaffold1140	-1	251177	252860
90	Lus10006279.g	Lus10006279	HH	HH	42	CTICLEEMGSGEGKAIRIDCKHEFHEICLISWLRKSNCCPLC	239	scaffold308	1	146939	147658
91	Lus10006378.g	Lus10006378	HH	HH	36	CTACTFTLDLPAVHFMCMHSFHQRCLGDNEKECPEC	962	scaffold1603	-1	108010	111355
92	Lus10006447.g	Lus10006447	HC	HC	38	CGICMEGSGQMVLPNCGHSFCMNCFHDWNSRSKSCPFC	242	scaffold743	-1	132663	134632
93	Lus10006448.g	Lus10006448	HC	HC	38	CGICLEPCTKMVLPSCYHAMCIKCYHNWNTRSESCPFC	241	scaffold743	1	139286	140995
94	Lus10006449.g	Lus10006449	HH	HH	39	CMICLEDLAAAAAEMPCRHRFHKGCIVSWLKQSHYCPIC	243	scaffold743	-1	143181	143912
95	Lus10006463.g	Lus10006463	HC	HC	33	CPVCLSNPKNMAFGCGHQTCFVCGEDLQSCPIC	429	scaffold743	-1	216016	218517
96	Lus10006493.g	Lus10006493	HH	HH	42	CAVCLSEFEEKEKGRTLPQCKHSFHTECIDMWFHSHSTCPLC	298	scaffold596	-1	130209	131105
97	Lus10006558.g	Lus10006558	HC	HC	41	CPLCNKLLRQATTISLCLHTFCRKCIYDLLSDEEVDTCPVC	375	scaffold1202	1	90152	92905
98	Lus10006651.g	Lus10006651	HC	HC	43	CPICLERLDPDTSGILSTLCDHSFQCSCTSKWTYLSCQVCRLC	481	scaffold345	-1	132924	135747
99	Lus10006741.g	Lus10006741	CC	CC	46	CHWCRKSGLSNLIRCSSCRKEFFCTDCIKDQYFDEQEEVETACPVC	850	scaffold204	-1	94415	98590
100	Lus10006785.g	Lus10006785	HH	HH	42	CVICLSEFAAGDRVKILPKCNHGFHVKCIDRWLGSHSSCPTC	224	scaffold689	1	18137	18811
101	Lus10006786.g	Lus10006786	HH	HH	42	CVICLSEFVAGDLVKVLPTCNHGFHVKCIDQWLGDHSSCPTC	197	scaffold689	-1	23681	24274
102	Lus10006787.g	Lus10006787	HH	HH	42	CVICLLEFAAGDLIKVLPTCNHGFHVKCIDQWLGSHSSCPTC	211	scaffold689	-1	31696	32331
103	Lus10006788.g	Lus10006788	HH	HH	42	CVICLLEFTAGDRVKILPKCNHGFHVRCIDKWLGSHSSCPTC	227	scaffold689	-1	36410	37093
104	Lus10006832.g	Lus10006832	HC	HC	41	CPICQATPSIPFLAHPCQHRYCYYCLRTRCAASPSFRCPRC	337	scaffold1356	1	17003	19590
105	Lus10007106.g	Lus10007106	ST	ST	44	CPVSREESSEENPPMMMPCLHVLCKKSIIKLSKNSLRSFKCPYC	381	scaffold772	1	268724	271255
106	Lus10007293.g	Lus10007293	CH	CH	67	CRICHLGSEGSMEEAVSSGDHIGGGVSGSSMELIQLGCGCKDELGVAHPHCAEAWFKLKGNRVCEIC	248	scaffold859	1	109600	110884
107	Lus10007296.g	Lus10007296	CC	CC	46	CNTCGEAIGVNPNGELFVACHECNFPMCKSCVEYETKEGRKACLRC	988	scaffold859	-1	119544	123410
108	Lus10007538.g	Lus10007538	CC	CC	46	CQICSDDIGKTSDGEPFLACHVCAFPVCRPCYEYERKDGTQSCPQC	1092	scaffold259	1	25486	31321
109	Lus10007628.g	Lus10007628	HH	HH	49	CSVCLEDMVAGDCNGGGAAGRVIRLDCKHDFHECCLISWLKTSNSCPLC	321	scaffold121	-1	126015	126980
110	Lus10007703.g	Lus10007703	HH	HH	55	CSICGRDVSYAPIPPETESGTYNFPEVAVLSCGHVFHMICFSSCNHSTDPSCFKC	197	scaffold221	1	180211	180899
111	Lus10007867.g	Lus10007867	HC	HC	48	CSICLTVFDPVSLRCGHIFCYICACSAASVTVVDGLQSADPQRKCPIC	155	scaffold1317	-1	56732	57480
112	Lus10007936.g	Lus10007936	HH	HH	42	CVVCLCGLSEGELVRELDCRHVFHKGCLDGWLRRCNFTCPIC	146	scaffold281	-1	50802	51242
113	Lus10007937.g	Lus10007937	HH	HH	42	CVVCLCGLSEGELVRELDCRHVFHKGCLDGWLRRSNFTCPIC	151	scaffold281	-1	54114	54569
114	Lus10007967.g	Lus10007967	HH	HH	42	CSICQEDFEGGDDEVGKLECGHGFHILCIKQWLAHKNNCPVC	261	scaffold281	-1	164397	165887
115	Lus10008046.g	Lus10008046	HH	HH	59	CGICQKVLRRKPYIHGDALSGGGEYAVVAVLVCGHMYHADCLEERTRIEHKSDPECPLC	225	scaffold896	1	180421	182118
116	Lus10008106.g	Lus10008106	HH	HH	41	CCICLGKYANNDELRELPCAHFFHKDCVDKWLKINATCPLC	377	scaffold524	1	150290	152023
117	Lus10008163.g	Lus10008163	HC	HC	35	CVICLENEYNAVFLPCGHMCCCTTCCSHLSSCPLC	345	scaffold480	1	39044	41358
118	Lus10008225.g	Lus10008225	CC	CC	46	CRVCGDDIGVKEDGIPFVACHVCGFPVCRPCYEYERSDGNQCCPQC	508	scaffold157	1	171602	173772
119	Lus10008235.g	Lus10008235	HH	HH	54	CAVCLSEFKEGELVRRLSCKHLFHRECVPEWGNDEEEEEDGGGNYGFSSSCPLC	174	scaffold157	-1	241817	242341
120	Lus10008283.g	Lus10008283	HH	HH	43	CTVCMEAISGEEKIRELCNCRHVFHRECVDRWVDEGRLSCPLC	181	scaffold489	-1	133370	133915
121	Lus10008286.g	Lus10008286	CH	CH	46	CRVCQQDKEEVLIDLGCKCKGGLAKSHRSCIDAWFLTRGSNKCEIC	263	scaffold489	-1	150026	151494
122	Lus10008447.g	Lus10008447	HH	HH	41	CSICLEEFCDSDPSTVTTCKHEFHLQCVLEWCQRSSQCPMC	405	scaffold61	1	298585	300766
123	Lus10008458.g	Lus10008458	HH	HH	42	CAVCLSSFEELEYIRLLPNCNHSFHLPCIDMWLYSHPHCPLC	137	scaffold295	-1	48863	49276
124	Lus10008628.g	Lus10008628	HH	HH	42	CPICRESIFTSSIPVKALPCGHLMHSPCFQDYTCNHYICPIC	1283	scaffold1686	1	210175	216187
125	Lus10008797.g	Lus10008797	HH	HH	42	CAVCLESFKTGEKCRVLPACKHSFHAECVDGWLLKIPVCPIC	242	scaffold729	1	273728	274456
126	Lus10008874.g	Lus10008874	HH	HH	41	CAVCKDDMNVGQKAKLLPCTHRYHEDCIVPWLKIRNTCPVC	443	scaffold311	1	97877	99303
127	Lus10008972.g	Lus10008972	HH	HH	45	CAICLAEYVDGDILRLLPDCEHVFHAPCVDQWLLMKNHSSTCPIC	178	scaffold1486	1	278983	279519
128	Lus10009035.g	Lus10009035	HC	HC	39	CVICLDAPVEGACVPCGHMAGCMSCLTEIKTKNWGCPVC	496	scaffold883	-1	185860	189076
129	Lus10009326.g	Lus10009326	HH	HH	50	CAICLEEWGEGDECRVLPECNHVYHKVCVDGWLLTGVNDHDQYRRCCPIC	133	scaffold318	1	356829	357230
130	Lus10009438.g	Lus10009438	HH	HH	42	CAICLEDYSVGEKIRILPCRHKFHAFCVDSWLTTWRTFCPVC	457	scaffold981	1	115396	117614
131	Lus10009511.g	Lus10009511	HH	HH	42	CAVCISKFQDSDVLRLLPSCKHAFHMECIDQWLNSHSSCPLC	399	scaffold1007	1	293027	294226
132	Lus10009529.g	Lus10009529	HC	HC	43	CSICHGHFKVPCQANCSHWFCGDCIMLVWQHGPPVQACKCPLC	186	scaffold1331	1	55537	56811
133	Lus10009674.g	Lus10009674	HC	HC	39	CVICLDTPVEGACVPCGHMAGCMSCLTEIKTKNWGCPVC	490	scaffold169	-1	293788	296850
134	Lus10009695.g	Lus10009695	HC	HC	43	CAICLDKIVLEETALIKGCEHAYCVTCILRWAMYSKNQNCPQC	259	scaffold455	-1	111787	113857
135	Lus10009773.g	Lus10009773	HH	HH	72	CPLCLYPLVQEKEEREILPFMKLMSCFHCYHSECIIRWWTWLQKQQENTSASSIRVENKMAAEKSMAQCPVC	368	scaffold271	-1	69199	71871
136	Lus10009810.g	Lus10009810	HC	HC	38	CFICREPFEDPVMTKCKHYFCEHCALKHHSKNKKCFVC	326	scaffold546	1	5028	6346
137	Lus10009832.g	Lus10009832	HH	HH	42	CCICLGTFEDGDKVKSLPRCHHCFHSECVDRWLLAHCDCPLC	176	scaffold546	-1	127452	127982
138	Lus10010011.g	Lus10010011	CH	CH	48	CRICHEAEFESFKSLEAPCSCSGTVKYAHRDCIQRWCDEKGNTICEIC	236	scaffold1630	-1	253603	255594
139	Lus10010069.g	Lus10010069	HC	HC	41	CAVCADSLEWVSYGACGHREVCSTCVARLRFIIEDRRCCIC	833	scaffold722	-1	56951	60623
140	Lus10010179.g	Lus10010179	HH	HH	41	CAVCKDEFEKGAEAKQMPCKHLYHRDCIVPWLELHNSCPVC	260	scaffold587	-1	163390	164172
141	Lus10010182.g	Lus10010182	HH	HH	41	CVVCRLDFEDEEAVTVLSCKHSYHAECINNWLKINKVCPVC	372	scaffold587	1	170036	172470
142	Lus10010372.g	Lus10010372	HH	HH	41	CCVCQEEYNNGEDIGTLDCGHDFHTGCVKQWLMLKNWCPIC	665	scaffold740	1	219647	222621
143	Lus10010392.g	Lus10010392	HC	HC	40	CVICYDEERNSFFVPCGHSATCLACARRIYNEENKVCPVC	186	scaffold583	1	236296	236964
144	Lus10010513.g	Lus10010513	HH	HH	41	CSICLDPFTVQDPATVTNCKHEYHLQCILDWCQRSKECPIC	396	scaffold680	-1	60505	62444
145	Lus10010791.g	Lus10010791	HC	HC	41	CNICFDLAQDPIVTLCGHLFCWPCLYKWLHFHSQSRECPVC	228	scaffold239	-1	48314	49000
146	Lus10011027.g	Lus10011027	HC	HC	38	CAICQEKMHAPILLRCKHIFCEDCVSEWFERERTCPLC	468	scaffold1035	1	184464	187377
147	Lus10011184.g	Lus10011184	HC	HC	41	CNICFDFAREPVVTLCGHLYCWPCIYKWLHVQTEHPQCPVC	244	scaffold1376	1	61947	62681
148	Lus10011211.g	Lus10011211	HC	HC	40	CGLCNDPPEDAVVSVCGHVFCNQCILEHLNGDDSQCPTHC	1204	scaffold1376	1	168504	173853
149	Lus10011309.g	Lus10011309	HC	HC	50	CEICMEDVPANMSTSMDCGHCFCNDCWTEHFIVQINEGQSRRIRCMAHKC	614	scaffold1037	-1	370493	373948
150	Lus10011380.g	Lus10011380	HH	HH	41	CPICLDEFVTLGSVPDLPCGHHFHIKCIVNWLKRSYSCPLC	209	scaffold744	-1	264163	264792
151	Lus10011390.g	Lus10011390	HC	HC	38	CGICMESSGQMVLPNCGHSFCMNCFHDWNSRSKSCPFC	242	scaffold744	-1	307673	309541
152	Lus10011391.g	Lus10011391	HC	HC	38	CGICLEPCTKMVLPSCYHAMCIKCYHNWNTRSESCPFC	243	scaffold744	1	315573	317988
153	Lus10011392.g	Lus10011392	HH	HH	41	CVVCLEDLPAAVPAAEMPCRHQFHEGCIVSWLKQSHYCPIC	249	scaffold744	-1	318787	319536
154	Lus10011405.g	Lus10011405	HC	HC	33	CPICLSNPKNMAFGCGHQTCFVCGEDLQSCPIC	439	scaffold744	-1	385626	388188
155	Lus10011416.g	Lus10011416	HH	HH	42	CCVCLCGFEDEEEVSELSCKHFFHKGCLQKWFDNRHVTCPLC	135	scaffold744	-1	437535	437942
156	Lus10011475.g	Lus10011475	HH	HH	41	CCICLNEYEDDEELRELPCAHVFHVECVDKWLKINASCPLC	418	scaffold1578	-1	306305	308476
157	Lus10011702.g	Lus10011702	HH	HH	42	CAVCLSKFDDSDVLRLLPSCKHAFHMECIDQWLNSHASCPLC	399	scaffold476	1	447107	448306
158	Lus10012033.g	Lus10012033	HH	HH	43	CAVCLLEFEHGRDYVRTLPNCSHAFHVDCIDIWLRSHANCPLC	417	scaffold931	-1	249346	250663
159	Lus10012062.g	Lus10012062	HC	HC	43	CPICFGEFTVACKANCGHWYCGGCILQFWNYSAASRPCKCPMC	245	scaffold931	-1	387288	389016
160	Lus10012198.g	Lus10012198	CC	CC	46	CQICSDDIGKTSDGEPFLACHVCAFPVCRPCYEYERKDGTQSCPQC	1094	scaffold1186	-1	407247	413050
161	Lus10012290.g	Lus10012290	HC	HC	49	CAICLEMVFNPYALSCGHLFCKSCACSAAFVPIFLGLKEATPDSKCSIC	334	scaffold273	-1	425207	427514
162	Lus10012332.g	Lus10012332	HH	HH	36	CTACTFTLDLPAVHFMCMHSFHQRCLGDNEKECPEC	883	scaffold572	-1	182395	185507
163	Lus10012365.g	Lus10012365	HH	HH	50	CCSCQAVLDEGSGETTRLGCMHVIHTNCLVSHVKSFPPHTAPAGYVCPSC	333	scaffold572	1	337926	341031
164	Lus10012376.g	Lus10012376	HD	HD	42	CTICLEEMGCGEGRVIWLECEHVFDESCLVSWLRISNSCPLC	156	scaffold572	-1	408897	409367
165	Lus10012628.g	Lus10012628	HH	HH	42	CAICLTEYCGKDTIRLIPECKHCFHADCIDEWLRMNTSCPVC	393	scaffold101	1	305578	307945
166	Lus10012745.g	Lus10012745	HH	HH	42	CSVCLSEFEQDETLRLLPKCSHAFHIPCIDTWLRSHTNCPLC	323	scaffold206	-1	371422	372393
167	Lus10012791.g	Lus10012791	CH	CH	47	CRICLDACEEGNTLKMECSCKGDLRLVHEECAIKWFSTKGNKNCEVC	446	scaffold604	1	249640	252124
168	Lus10012793.g	Lus10012793	CH	CH	47	CRICLDTIREGEKMKLACGCKGDLRLVHEECAVSWFSTKGNKVCEIC	241	scaffold604	1	263271	264325
169	Lus10012811.g	Lus10012811	HH	HH	43	CPICYEYLFDSMKDTIVMKCGHTMHCECHYEMIKRDRYCCPIC	298	scaffold604	-1	424621	427432
170	Lus10012819.g	Lus10012819	HH	HH	42	CVICLDEWEKEGEVVKEMPCKHRFHGGCVEKWLKVHGSCPVC	236	scaffold1313	-1	15779	16489
171	Lus10012826.g	Lus10012826	CH	CH	46	CRICQEEDSVENLESPCGCSGSLKYAHRKCVQHWCNEKGDTICEIC	286	scaffold1313	1	38140	39786
172	Lus10012867.g	Lus10012867	HC	HC	51	CPICHEKLSDEKMVFQCGHFICCKCLLAMTEPKEPQDRKFQSLKWVMCPTC	2138	scaffold1313	1	241093	251249
173	Lus10012975.g	Lus10012975	HH	HH	42	CAVCISKFEDVEILRLLPKCKHAFHINCIDQWLERHSSCPIC	413	scaffold434	1	401030	402271
174	Lus10012987.g	Lus10012987	HH	HH	42	CAVCLCEFSDKDKLRLLPICSHAFHIDCIDAWLLSNSTCPIC	356	scaffold751	1	12345	13415
175	Lus10013027.g	Lus10013027	HC	HC	35	CRACKSREVSVLLMPCRHLCLCIDCDMFVNVCPVC	326	scaffold751	-1	234075	235228
176	Lus10013144.g	Lus10013144	HH	HH	41	CCICLGKYANNDELRELPCVHFFHKDCVDKWLKINATCPLC	416	scaffold359	1	205540	207316
177	Lus10013210.g	Lus10013210	HH	HH	42	CAICLSEFAAGEELRVLPQCGHGFHVSCIDTWLGSHSSCPSC	203	scaffold372	-1	97778	98584
178	Lus10013235.g	Lus10013235	HH	HH	41	CPVCKDQFEAGSEARQMPCNHMYHSDCIVPWLEQHNSCPVC	307	scaffold372	1	198374	199297
179	Lus10013371.g	Lus10013371	HC	HC	51	CQICFVRFSIPDFSSLNCGHNFCNQCWTQYVKVSIDDGIGCLSLRCPEPKC	508	scaffold812	1	402715	404241
180	Lus10013374.g	Lus10013374	HH	HH	41	CSICLEEFCDSDPSTVTTCKHEFHLQCVLEWCQRSSQCPMC	439	scaffold812	-1	415902	418758
181	Lus10013397.g	Lus10013397	HH	HH	41	CSVCLDDFEVGSEAKEMPCKHKFHSGCILPWLELHSSCPVC	391	scaffold230	-1	7804	8979
182	Lus10013452.g	Lus10013452	HC	HC	41	CRVCNDLPEDPVVTMCGHVFCYQCVSNYLAGDDNTCPGADC	1735	scaffold230	-1	252814	267973
183	Lus10013475.g	Lus10013475	HH	HH	42	CVVCLCGLSEGELVRELDCRHVFHKGCLDGWLRRCNFTCPIC	150	scaffold230	-1	360835	361287
184	Lus10013491.g	Lus10013491	CH	CH	46	CRICQDEDFDSNMEAPCSCCGSLKHAHRRCVQKWCNEKGNTTCEIC	512	scaffold230	-1	432271	437120
185	Lus10013497.g	Lus10013497	HH	HH	42	CSICQEDFEGGDAEVGKLECGHGFHIHCIKQWLAHKNNCPVC	233	scaffold230	-1	455339	456846
186	Lus10013606.g	Lus10013606	HH	HH	41	CSICLDDFTSTDPSTLTNCRHEYHLQCILEWCQRSSDCPMC	359	scaffold62	-1	507648	509842
187	Lus10013618.g	Lus10013618	HH	HH	42	CSVCLSEFEEEEKIRLLPQCHHAFHVPCIDAWLKSHATCPLC	300	scaffold317	1	61356	62258
188	Lus10013739.g	Lus10013739	HC	HC	36	CPVCMNLIYPPIYQCPNGHTLCSNCKARVHNSCPTC	308	scaffold1168	-1	274381	275603
189	Lus10013821.g	Lus10013821	HG	HG	46	CSICMEAWTSEGHHHICCLPCGHLFGLSCIEKWLKQKRSSGKCPQC	633	scaffold618	1	123724	127286
190	Lus10014118.g	Lus10014118	HC	HC	35	CKGCNSRGACVLFLPCRHLCSCNVCEGFLGSCPVC	198	scaffold1247	-1	479191	479885
191	Lus10014366.g	Lus10014366	HC	HC	43	CPICFGEFSVACKANCGHWYCGSCILQLWNFSAGSRPCKCPMC	429	scaffold176	-1	25075	30589
192	Lus10014526.g	Lus10014526	HH	HH	42	CAVCLCEFSEKDKLRLLPICSHAFHISCIDTWLLSNSTCPLC	371	scaffold107	1	139964	141079
193	Lus10014749.g	Lus10014749	HC	HC	41	CTICNRLFRDATTISECLHTFCRKCIYRRISNDGLESCPIC	437	scaffold584	-1	491317	494166
194	Lus10014823.g	Lus10014823	HH	HH	42	CAICLEDYSVGEKLRILPCQHKFHALCVDSWLTTWRTFCPVC	632	scaffold184	1	420938	425994
195	Lus10015046.g	Lus10015046	HH	HH	41	CVVCKEEMEEGREVCEMPCGHLFHWSCILRWLSNRNTCPTC	306	scaffold54	1	137924	138844
196	Lus10015080.g	Lus10015080	HC	HC	39	CVICLSEPRDTTVLPCRHMCMCSGCAKVLRFQTNRCPIC	372	scaffold54	-1	428856	430524
197	Lus10015126.g	Lus10015126	HH	HH	43	CNHCKLPGDDCPLIWGQCNHAFHLHCILKWVNSQTSQAHCPMC	156	scaffold866	1	143694	144520
198	Lus10015152.g	Lus10015152	HC	HC	38	CCVCMERDKGAAFIPCGHTFCRVCSRALWGRRGCCPVC	166	scaffold866	1	268379	268879
199	Lus10015167.g	Lus10015167	HH	HH	42	CAVCLNEFDDHETLRLIPNCDHVFHPECIDAWLESHTTCPVC	323	scaffold866	1	348274	349245
200	Lus10015213.g	Lus10015213	HC	HC	42	CGICFTEEDKRRLRGTLNCCSHYFCFKCIMEWSKVESRCPLC	970	scaffold866	1	555021	558355
201	Lus10015260.g	Lus10015260	CC	CC	47	CHQCKRNDKGPVVRCKTCDRKKYCHLCLDTWYPKMKREEIAAKCPFC	932	scaffold924	1	188780	193196
202	Lus10015273.g	Lus10015273	CH	CH	62	CRICHLSSEGSIEVVAAAPGVVVTSMELIQLGCGCKDELGVAHSHCGEAWFKLKGNRVCEIC	299	scaffold924	-1	260238	261698
203	Lus10015502.g	Lus10015502	HH	HH	42	CAVCLSEFEPEDKLRLLPKCSHAFHMDCIDTWLLSHSTCPLC	395	scaffold860	-1	272580	273767
204	Lus10015503.g	Lus10015503	HC	HC	50	CVVCLEATCRVAAAGCNHEFCTRCALYLCSTICSVKTSQGPAGSVPCPLC	586	scaffold860	1	282522	286010
205	Lus10015506.g	Lus10015506	HH	HH	42	CVVCLDGIKQGQWCRMLCGCGHVFHRRCVDTWLSKVPSCPIC	133	scaffold860	1	294467	294868
206	Lus10015722.g	Lus10015722	HC	HC	38	CTLCLKLLFEPVTTPCGHSFCRSCLFQSMDRGNKCPLC	487	scaffold430	-1	55442	60877
207	Lus10015732.g	Lus10015732	HC	HC	55	CPICWESFNVVENVPYVLWCGHTLCKNCIQGLQRAVVKLPTLPVQLPFFITCPWC	274	scaffold430	1	129826	130650
208	Lus10015837.g	Lus10015837	HH	HH	51	CAICLEEWEEGDECRVLPECNHVYHKVCVDGWLLTGVNEHRDDQYRRCPTC	134	scaffold175	-1	35635	36039
209	Lus10015901.g	Lus10015901	HH	HH	42	CSVCLNEFHEDAMLRLLPKCNHAFHVSCIDTWLRSHTNCPLC	333	scaffold175	1	562069	563070
210	Lus10015986.g	Lus10015986	HC	HC	49	CAICLEMVFNPYALSCGHLFCKSCACSAAFVPIFLGLKEATPDSKCSVC	334	scaffold172	1	95829	98075
211	Lus10016040.g	Lus10016040	HH	HH	42	CAICLAEFAVGDEIRLLPQCGHGFHVKCIDTWLGSHSSCPSC	201	scaffold172	1	384340	384945
212	Lus10016102.g	Lus10016102	HH	HH	44	CAICLTNMKAGHGHAIFTAECSHSYHFHCITSNVKHGNQICPVC	694	scaffold344	-1	109783	112905
213	Lus10016163.g	Lus10016163	HH	HH	42	CVICLGEFEEGERVKVLPFCGHVFHVECVDTWLMSQVSCPLC	212	scaffold344	-1	603677	604315
214	Lus10016195.g	Lus10016195	HH	HH	41	CSICLEEFSSNDPSTLTKCRHEYHLQCILEWCQRSSDCPMC	314	scaffold947	-1	151686	153630
215	Lus10016255.g	Lus10016255	HC	HC	41	CNICFDLASDPVVTCCGHLFCWACLYRWLHIHSDAKECPVC	433	scaffold947	-1	494402	495703
216	Lus10016303.g	Lus10016303	HC	HC	41	CNICFDLAQDPIVTLCGHLFCWPCLYKWLHFHSQSRECPVC	228	scaffold515	-1	325045	325731
217	Lus10016348.g	Lus10016348	HC	HC	36	CPVCRNAMYPPIHQCSNGHTLCSACKPRVHNRCPTC	366	scaffold179	-1	149003	150605
218	Lus10016416.g	Lus10016416	HH	HH	41	CVICQMRYKRGEKQTKLPCKHTYHSECITKWLVINKVCPVC	246	scaffold179	-1	472987	474548
219	Lus10016426.g	Lus10016426	CH	CH	48	CRICLETDGRDFIAPCKCKGTSKYVHRECLDHWRAVREGFAFAHCTTC	323	scaffold179	1	527850	530526
220	Lus10016427.g	Lus10016427	HH	HH	53	CSVCLREFSKGDAVRKLGCDHTFHVDCVDRWFDQELANKRKGMSNFVVTCPLC	186	scaffold179	-1	531826	532386
221	Lus10016428.g	Lus10016428	HH	HH	49	CAVCLSEFMAGEDVRKLGCSHSFHKDCVDKWLFRADDRKLVVVVTCPLC	158	scaffold179	-1	538555	539031
222	Lus10016451.g	Lus10016451	CH	CH	52	CRICHLGLLSNEQESGVAIELGCSCKGDLAAAHKKCAETWFKIKGNMVCEIC	190	scaffold279	1	37294	38984
223	Lus10016541.g	Lus10016541	HH	HH	42	CSICLEEFKGEDECRVLTVCGHVYHKECIDLWLTDDNHCPLC	162	scaffold279	-1	432414	432902
224	Lus10016561.g	Lus10016561	HC	HC	49	CCICFEQVCTIEVQNCGHQMCANCTLALCCHNKPNPTTASVTPPVCPFC	452	scaffold279	-1	523377	525407
225	Lus10016796.g	Lus10016796	HC	HC	41	CNICLELAQDPIVTLCGHLFCWPCLYRWLHHHSNSHECPVC	229	scaffold903	-1	545138	545827
226	Lus10016817.g	Lus10016817	HC	HC	38	CCICYTSEADAQFGPCLHRSCYGCITRHLLNSHRCFFC	1140	scaffold903	-1	619018	625902
227	Lus10016924.g	Lus10016924	HH	HH	44	CSICLGPKCYEEDVVILQFSKCGHSFHERCLLLWLKKTTTCPLC	341	scaffold235	1	45065	46090
228	Lus10016936.g	Lus10016936	HH	HH	42	CAICLEDYSVGEKLRILPCRHKFHALCVDSWLTTWRTFCPVC	434	scaffold235	1	246916	249700
229	Lus10017092.g	Lus10017092	CC	CC	47	CHQCQRKDRSRVLWCLKCDKRGFCDNCIAAWYPDIPWEEIEKVCPAC	934	scaffold216	-1	155263	159521
230	Lus10017197.g	Lus10017197	CH	CH	52	CRICHLGLESNVHESGIPIELGCSCKNDLAAAHKQCAETWFKIKGNKTCEIC	244	scaffold117	1	109198	110500
231	Lus10017253.g	Lus10017253	HH	HH	42	CAVCLDEIEAEDPARMIPVCNHGYHLECADKWLSKHPFCPVC	134	scaffold117	-1	393322	393726
232	Lus10017383.g	Lus10017383	HH	HH	41	CAVCKDEFEKGAEAKQMPCKHLYHRDCIVPWLELHNSCPVC	109	scaffold511	-1	360730	361059
233	Lus10017385.g	Lus10017385	HH	HH	41	CVICRLDFEDEEAVTVLSCKHSYHAECINNWLKINKVCPVC	364	scaffold511	1	366834	369227
234	Lus10017455.g	Lus10017455	HC	HC	39	CCVCCDSHIDSLLYRCGHMCTCMKCANELVRSDGKCPLC	800	scaffold1253	-1	58469	62553
235	Lus10017510.g	Lus10017510	HH	HH	43	CAVCLYDFEEEDEIRSLANCRHVFHKECLDRWMGYERRTCPMC	180	scaffold1253	-1	318254	318796
236	Lus10017722.g	Lus10017722	HH	HH	44	CVICLEEMEESGGERVMIRMECGHMFHESCSVSWLRVSDFCPLC	199	scaffold765	-1	656309	656908
237	Lus10017750.g	Lus10017750	HH	HH	41	CCICLATYGDDDELKELPCSHLFHASCVDIWLKLKAFCPLC	319	scaffold212	-1	262335	263604
238	Lus10017764.g	Lus10017764	CH	CH	51	CRICLESDCEPGDELISPCMCKGTQQFVHRVCLDHWRAVREGFAFSHCTTC	190	scaffold212	1	529227	531189
239	Lus10017788.g	Lus10017788	HH	HH	41	CPICLEEYDRENPKLNTKCEHHFHLPCLLEWMERSDTCPMC	191	scaffold14	1	256325	257731
240	Lus10017865.g	Lus10017865	HH	HH	41	CAICKENLVVDDKMQELPCKHTFHPPCLKPWLDEHNSCPIC	311	scaffold35	1	416773	418245
241	Lus10017969.g	Lus10017969	HC	HC	35	CKVCFESATAAILLPCRHFCLCKSCSLACSECPIC	1091	scaffold687	1	128952	141216
242	Lus10017978.g	Lus10017978	HH	HH	59	CGICLKLLTDRSLWSAQKLVANNELPVVAILTCGHVYHAECLETLTHEIAKYDPSCPIC	438	scaffold687	-1	173729	175893
243	Lus10018110.g	Lus10018110	HC	HC	36	CPVCTNSMYPPIHQCSNGHTLCSTCKVKVHNRCPTC	338	scaffold112	-1	135763	137679
244	Lus10018125.g	Lus10018125	CC	CC	48	CPLCAEEMDLTDQQLKPCKCGYEICVWCWHHIMDMAEKDASEGRCPAC	967	scaffold112	-1	291444	296110
245	Lus10018126.g	Lus10018126	CC	CC	48	CPLCAEEMDLTDQQLKPCKCGYEICVWCWHHILDMAEKDASEGRCPAC	1012	scaffold112	-1	306965	311675
246	Lus10018140.g	Lus10018140	HH	HH	44	CVICQAEYEEKEAEEVVQIVGCGHAYHKECVTNWLLIRKSCPVC	228	scaffold112	1	406118	406804
247	Lus10018167.g	Lus10018167	HH	HH	41	CTVCLDEMLIGVQVACLPCEHLFHGSCIVQWLETSHLCPLC	229	scaffold112	-1	529443	530132
248	Lus10018271.g	Lus10018271	HC	HC	39	CAICRGDRLRDPMATMCGHVFCRICILNALTWNRICPTC	139	scaffold163	-1	295516	295935
249	Lus10018292.g	Lus10018292	HH	HH	45	CCICLMQMEIGGGSDLKMLPCQHKFHKVCIERWHMRKRRRTCPLC	147	scaffold163	-1	398059	398502
250	Lus10018293.g	Lus10018293	HC	HC	49	CSICCEDKISAMMITMNCSHKFCSHCMRTYVEEKMQSCQVPIRCPQPGC	434	scaffold163	-1	399322	401108
251	Lus10018294.g	Lus10018294	HC	HC	36	CRKCGEKESSVLVLPCRHLCLCTVCGSTLVGTCPVC	341	scaffold163	-1	414588	416034
252	Lus10018409.g	Lus10018409	HC	HC	42	CPSCKVTLTNTVTLVALSSCGHVFCKKCGDKFVAVDKVCLVC	304	scaffold251	1	283289	285091
253	Lus10018465.g	Lus10018465	HC	HC	41	CGLCNDPPEDAVVSVCGHVFCNQCILEHLNGDDSQCPTPHC	1146	scaffold251	1	575024	580922
254	Lus10018489.g	Lus10018489	HC	HC	41	CNICFDFAREPVVTLCGHLYCWPCIYKWLHVQTEHPQCPVC	244	scaffold251	-1	687008	687742
255	Lus10018589.g	Lus10018589	HC	HC	59	CNICLDSVMNPVVTLCGHLYCWPCIYKWLNSAAVSGGGDDVDDDEDYYELQSHGRCPVC	214	scaffold1308	-1	463561	464205
256	Lus10018609.g	Lus10018609	HC	HC	40	CPICLGIIKKTRTVMECLHRFCRECIDKSMRLGNNECPAC	561	scaffold1308	-1	533055	536872
257	Lus10018613.g	Lus10018613	HH	HH	44	CVICMTSIDMMQRPSDCMVTPCDHFFHSGCLQRWMDIKMECPTC	525	scaffold1308	-1	544578	548177
258	Lus10018817.g	Lus10018817	HH	HH	48	CSICYEDLKPIVEDLQVISICGHVLHELCLQQWFEYCPGKKKYSCPVC	573	scaffold103	1	13915	16849
259	Lus10019018.g	Lus10019018	HH	HH	42	CSICLSEYNPKETVKTIPDCHHCFHAECIDEWLRLNGTCPIC	384	scaffold257	-1	80870	83237
260	Lus10019075.g	Lus10019075	HC	HC	38	CTLCLKLLFEPVTTPCGHSFCRSCLFQSMDRGNKCPLC	576	scaffold30	1	2724	8053
261	Lus10019102.g	Lus10019102	CH	CH	46	CRICQEEDSLVNLEVPCACSGSLKYAHRKCVQRWCNEKGDINCEIC	292	scaffold30	1	144807	147455
262	Lus10019150.g	Lus10019150	HH	HH	42	CSICLAKIQQREQVTKLRCTHLFHRACLDRWFGSSGLTCPLC	140	scaffold30	-1	389241	389663
263	Lus10019507.g	Lus10019507	HH	HH	54	CAVCLNQMKKDDEVRELRNCCHVFHKDCIDRWIDHELDDQEEDDESNRRTCPLC	191	scaffold906	-1	560653	561228
264	Lus10019685.g	Lus10019685	HH	HH	48	CAVCLSEFVAGEDVRELGCRHSFHKDCVDKWLFRADDRKLVAVTCPLC	162	scaffold420	1	310881	311369
265	Lus10019686.g	Lus10019686	HH	HH	54	CSVCLREFSKGDAVRKLGCDHTFHVDCLDRWFDQEVANKWRKGGSNFVVTCPLC	181	scaffold420	1	317239	317784
266	Lus10019687.g	Lus10019687	CH	CH	48	CRICLETDGRDFIAPCKCKGTSKYVHRECLDHWRAVREGFAFAHCTTC	323	scaffold420	-1	321247	324051
267	Lus10019703.g	Lus10019703	HH	HH	41	CVICQMRYKRGEKQTKLPCKHTYHSECITKWLVINKVCPVC	246	scaffold420	1	394888	396376
268	Lus10019790.g	Lus10019790	HC	HC	35	CKGCNSRGACVLFLPCRHLCSCNVCEGFLDSCPVC	198	scaffold1491	1	56668	57366
269	Lus10019837.g	Lus10019837	ST	ST	44	CPVSKEQSTDENPPMLMSCGHVLCKQSINKMSKNNTKTFKCPYC	339	scaffold1491	-1	256020	257039
270	Lus10019839.g	Lus10019839	CH	CH	47	CRICRNPGDAENPLRYPCACSGSIKFVHQDCLLQWLNHSNARQCEVC	1875	scaffold1491	1	267111	279633
271	Lus10019973.g	Lus10019973	HH	HH	42	CAVCLSEFEPEDKLRLLPNCSHAFHMDCIDTWLLSHSTCPLC	393	scaffold23	-1	185931	187112
272	Lus10019974.g	Lus10019974	HC	HC	50	CVVCLEATCRVAAAGCNHEFCTRCALYLCSTICSAKTSQGPPGSVPCPLC	513	scaffold23	1	194097	196754
273	Lus10019979.g	Lus10019979	HH	HH	42	CVVCLDGIKQGQWCRMLCGCGHVFHRRCVDTWLSKVPSCPIC	164	scaffold23	1	209982	210476
274	Lus10020007.g	Lus10020007	HC	HC	38	CTLCLSDRQHPTATACGHVFCWNCIMEWCNEKPECPLC	353	scaffold23	-1	379878	382880
275	Lus10020033.g	Lus10020033	CC	CC	47	CHQCLKAERKLYVRCLNCRTNLYCLRCINQWYPEMTDQDIAQQCPFC	917	scaffold23	1	507809	513943
276	Lus10020084.g	Lus10020084	CC	CC	46	CHWCRKSGLSNLIRCSSCRKEFFCTDCIKDQYFDEQEEVETACPVC	1050	scaffold23	1	734566	738636
277	Lus10020145.g	Lus10020145	HH	HH	41	CSICQEEYADEEELGRLRCEHKYHLNCIQQWLRVKNWCPVC	499	scaffold454	1	266259	268477
278	Lus10020229.g	Lus10020229	HC	HC	46	CGICFETYPCDKLHAAACGHPFCSSCWAGYIGTSINDGPGCLMLRC	655	scaffold454	-1	726607	733930
279	Lus10020256.g	Lus10020256	HH	HH	61	CGVCSKLLWQKSPWSSNRIMRGGVGDMPTAGVLHCAHVFHAECLEQVTPKTQVHDPPCPLC	401	scaffold641	1	103834	105231
280	Lus10020258.g	Lus10020258	HH	HH	41	CAVCLEDFELGSEAKEMPCKHKFHEGCIHPWLELHSSCPVC	733	scaffold641	1	110273	113629
281	Lus10020349.g	Lus10020349	HC	HC	43	CSICHGHFKVPCQANCSHWFCGDCIMLVWQHGPPVQACKCPLC	186	scaffold641	1	507961	509227
282	Lus10020487.g	Lus10020487	ST	ST	44	CPVSREESNEENPPMMMPCLHVLCKKSIIKLSKNSSRSFKCPYC	384	scaffold44	1	607005	608159
283	Lus10020655.g	Lus10020655	HH	HH	45	CSICLEGVTDTGDRSWAKLQCGHQFHLDCIGSAFNIKGAMQCPNC	407	scaffold303	1	49708	52540
284	Lus10020859.g	Lus10020859	HH	HH	42	CVICLSDFAAGEKVKILPKCNHGFHVKCIDRWLRSHSSCPTC	255	scaffold711	1	278700	279467
285	Lus10020903.g	Lus10020903	HC	HC	45	CSICLSIWHDVVTVGPCLHNFCNGCFSEWLKRSQEKRSKVLCPQC	491	scaffold711	-1	513184	518876
286	Lus10021063.g	Lus10021063	HC	HC	41	CNICFDLASDPVVTCCGHLFCWACLYRWLHLHSDAKECPIC	418	scaffold155	1	346164	347420
287	Lus10021113.g	Lus10021113	CH	CH	52	CRICHLGLESNIHESGIPIELGCSCKNDLAASHKQCAETWFKIKGNKTCEIC	185	scaffold155	-1	579485	580961
288	Lus10021197.g	Lus10021197	HH	HH	42	CAVCLNEFVEDEKLRRIPNCCHVFHIDCIDAWLQNNSNCPLC	336	scaffold11	1	484830	485840
289	Lus10021245.g	Lus10021245	HH	HH	41	CSICLDDFTSTDPSTLTNCRHEYHLQCILEWCQRSSDCPMC	395	scaffold1123	1	96916	100257
290	Lus10021403.g	Lus10021403	HC	HC	39	CCICGESNIDSLLYRCGHMCTCTKCANELIRTGEKCPMC	758	scaffold612	-1	135231	138396
291	Lus10021458.g	Lus10021458	HH	HH1 HH2	44 44	CAICLTNMKAGHGHAIFTAECSHSLHFHCITSNVKHGNQICPVC CAICLTNMKAGHGHAIFTAECSHSFHFHCITSNVKHGNQICPVC	736	scaffold612	1	471090	474626
292	Lus10021482.g	Lus10021482	CH	CH	48	CRICLVELCEGGETLKMECSCKGELALAHQECAVKWFSIKGNKTCDVC	477	scaffold612	-1	660772	663167
293	Lus10021524.g	Lus10021524	HH	HH	42	CSICLQDFQGGELAREVPSCGHYFHADCLDNWLIRNASCPMC	243	scaffold362	-1	58736	59905
294	Lus10021628.g	Lus10021628	HH	HH	42	CTICLQDIGKGEVARSLPKCQHSFHMACVDKWLVRHGSCPVC	245	scaffold208	-1	63204	64267
295	Lus10021670.g	Lus10021670	CH	CH	46	CRICQEEDSLMNLETPCACSGSLKYAHRKCVQRWCNEKGDIICEIC	307	scaffold208	1	388774	391464
296	Lus10021683.g	Lus10021683	HH	HH	40	CPVCLERLDQDMGGILTTICNHSFHCSCISKWADSSCPVC	485	scaffold208	-1	478624	482145
297	Lus10021710.g	Lus10021710	HC	HC	35	CRICFEEQINVVILPCRHHALCGTCCEKCKKCPIC	515	scaffold208	-1	680814	686503
298	Lus10021722.g	Lus10021722	HH	HH	41	CTVCQEEFERDDELGKLECGHGFHLECIKQWLANKNTCPVC	322	scaffold208	1	826568	828795
299	Lus10021801.g	Lus10021801	HH	HH	41	CCICLTSYEDGAELNALPCNHHFHSSCIVRWLKMNATCPLC	395	scaffold108	1	365873	368716
300	Lus10021842.g	Lus10021842	HH	HH	42	CAVCLDEIEEKQTARRIPVCNHGFHVECADKWLSNNPFCPVC	121	scaffold108	-1	792179	792544
301	Lus10021953.g	Lus10021953	HC	HC	40	CVMCLSEAMSVVFLPCAHQVVCISCNELHEKKGMKDCPSC	531	scaffold164	-1	730195	732913
302	Lus10021954.g	Lus10021954	HC	HC	40	CVMCLSEAMSVVFLPCAHQVVCTSCNELHEKKGMKDCPSC	892	scaffold164	1	734266	737581
303	Lus10021993.g	Lus10021993	HC	HC	41	CRLCNKLFRQPTTISLCLHTFCRKCIYNRLSDGGVGTCPVC	415	scaffold87	1	204007	206526
304	Lus10022223.g	Lus10022223	HH	HH	42	CAVCLESFKTGEKCRVLPACKHSFHAECVDGWLLKIPVCPIC	239	scaffold225	-1	205291	206010
305	Lus10022294.g	Lus10022294	HC	HC	33	CPICLSNEKDMAFGCGHQTCCECGQNLQSCPIC	441	scaffold225	1	584576	586834
306	Lus10022324.g	Lus10022324	HC	HC	39	CAICLEICYEPSTTSCGHSFCKKCLRSAADKCGKKCPKC	416	scaffold225	1	698115	699887
307	Lus10022405.g	Lus10022405	HC	HC	36	CPVCTNSMYPPIHQCSNGHTLCSTCKVKVHNRCPTC	337	scaffold38	1	344415	346455
308	Lus10022449.g	Lus10022449	CC	CC	46	CRICGDEIGVNGDGEVFLGCNECAFPICRACYDYERREGGQVCPRC	1035	scaffold38	-1	587187	591802
309	Lus10022492.g	Lus10022492	HC	HC	41	CNICLELAQDPIVTLCGHLFCWPCLYRWLHHHSNSHECPVC	229	scaffold38	-1	811862	812551
310	Lus10022567.g	Lus10022567	HH	HH	41	CCICLSKYKEKEEVRELPCLHTFHLKCVDQWLRIISCCPLC	364	scaffold465	1	791737	793510
311	Lus10022569.g	Lus10022569	HC	HC	39	CPVCISDLVEPTSTKCGHIFCKECLRKSLASSNNKCPTC	200	scaffold465	-1	805412	806786
312	Lus10022585.g	Lus10022585	CH	CH	48	CRICLVELCEGGETLKMECSCKGELALAHQDCAVKWFSIKGNKTCDVC	482	scaffold59	-1	41148	43689
313	Lus10022743.g	Lus10022743	HH	HH	42	CSICLGEFTDGEKVRVLPKCNHGFHVECVDKWLQSRSSCPNC	186	scaffold59	-1	743663	744223
314	Lus10022774.g	Lus10022774	HC	HC	38	CPICMAPFVEETSTKCGHIFCKKCIKDALAFRAKCPTC	212	scaffold8	-1	46473	47430
315	Lus10022895.g	Lus10022895	HC	HC CH	38 44	CPLCLDLLKEPHLLSCDHIFCRSCLPGSTQLALQCPFC CSRCRKKGAALGCYVESCRKSYHVLCAMEISNCRWDLKNFLVLC	701	scaffold8	-1	650816	654388
316	Lus10022967.g	Lus10022967	HH	HH	41	CPVCKEEFKMGEEAREMPCHHLYHSDCIVPWLTMHNTCPVC	293	scaffold355	1	434556	435753
317	Lus10023055.g	Lus10023055	HH	HH	42	CCVCLGEFEMKEELLQISLCRHVFHMDCIHHWLHTNSTCPLC	222	scaffold325	1	164408	165704
318	Lus10023068.g	Lus10023068	HC	HC	39	CGICMDFIIDRGVLDCCQHWFCFGCIDNWASITNLCPLC	1215	scaffold325	-1	250712	256867
319	Lus10023112.g	Lus10023112	HH	HH	41	CCICLNEYEDDEELRELPCAHVFHVECVDKWLKINASCPLC	448	scaffold325	-1	472426	474905
320	Lus10023162.g	Lus10023162	HC	HC	47	CPICLCEVEKGYRLESCSHLFCQPCLMEQFESAMKNLDSFPVCCAQC	1763	scaffold325	1	742760	748930
321	Lus10023182.g	Lus10023182	HC	HC	39	CVICLSEPRDTTVLPCRHMCMCSGCAKVLRFQTNRCPIC	286	scaffold325	-1	833301	834577
322	Lus10023235.g	Lus10023235	HH	HH	41	CAVCKDDMNVGEKAKLLPCTHRYHEDCIVPWLKIRNTCPVC	437	scaffold98	-1	148259	149661
323	Lus10023477.g	Lus10023477	HH	HH	38	CIICREEMTTAKKLVCGHLFHVHCLRSWLERQHTCPTC	552	scaffold1216	-1	374024	376579
324	Lus10023507.g	Lus10023507	HH	HH	42	CAICLEEYKKGSRIGKLRKCGHEYHIGCIKKWLTVKNSCPIC	525	scaffold1216	-1	543160	545832
325	Lus10023527.g	Lus10023527	HH	HH	44	CSICLTKMKEGGGQALFTAECSHSFHFHCIASNVKHGNQICPVC	708	scaffold1216	-1	664498	667812
326	Lus10023617.g	Lus10023617	HH	HH	42	CAVCLNRFENPEVLRLLPKCRHAFHVDCVDTWLDAHSTCPLC	351	scaffold505	-1	187003	188126
327	Lus10023671.g	Lus10023671	HH	HH	41	CAICLETPSIGETIRHLPCFHKFHKDCIDPWLGRQKSCPVC	719	scaffold505	1	461949	466042
328	Lus10023914.g	Lus10023914	HH	HH	43	CPVCFEFLFETMKDITVLPCGHTIHLECVKQMERHCQYSCPVC	341	scaffold177	1	492866	494903
329	Lus10024057.g	Lus10024057	HC	HC	39	CSVCSDRPKEVVIVKCYHLFCNPCIQRNLELRHRKCPGC	845	scaffold353	-1	267182	275071
330	Lus10024116.g	Lus10024116	HC	HC	35	CMICQALLFDCAKCIPCSHVFCKVCVSRFKDCPLC	358	scaffold353	1	582526	585042
331	Lus10024124.g	Lus10024124	HH	HH	42	CSICLADYRANDTLRCIPDCNHCFHADCVDEWLRVTATCPLC	185	scaffold353	-1	643331	643888
332	Lus10024135.g	Lus10024135	HC	HC	46	CSVCQNRYNDEERVPLLLQCGHGFCKECLSKMFSASQDTTLVCPRC	252	scaffold353	1	702514	703272
333	Lus10024372.g	Lus10024372	HH	HH	41	CAVCKEAFQLDSEAREMPCKHIYHSDCILPWLSLRNSCPVC	337	scaffold16	1	569090	570231
334	Lus10024405.g	Lus10024405	HH	HH	42	CPVCLSDFNEGEPVRSLPACSHVFHVACIDRWLICHSNCPVC	177	scaffold16	-1	753623	754156
335	Lus10024629.g	Lus10024629	HH	HH	51	CSVCLDSIHYHNVDDDYPVGSTSVKRLACCHVFHEDCIRRWLAVKASCPLC	147	scaffold349	-1	431013	431456
336	Lus10024635.g	Lus10024635	HH	HH	41	CPTCLEEYDDENPRIITKCEHHFHLACILEWMERSDTCPVC	187	scaffold349	1	456250	456887
337	Lus10024657.g	Lus10024657	HH	HH	43	CAVCLYDFEEEDEIRNLANCRHVFHRSCLDRWMGYDRRTCPLC	179	scaffold349	-1	585595	586134
338	Lus10024759.g	Lus10024759	HH	HH	72	CPLCLYPLVQEKEEREILPFMKLMSCFHCYHSECIIRWWTWLQKQQENTSGSSIRVENKIAPENSMGQCPVC	379	scaffold320	-1	496874	499646
339	Lus10024810.g	Lus10024810	HH	HH	41	CCVCQEEYSDGERIGTLDCGHDFHMDCIKQWLMLKNWCPIC	666	scaffold473	1	138045	140684
340	Lus10024881.g	Lus10024881	HH	HH	42	CVVCLNDFHEHDILRVLPNCAHSFHLDCIDVWLHSNSNCPIC	325	scaffold473	-1	541744	543175
341	Lus10025031.g	Lus10025031	CH	CH	48	CRICHEAEFESFKSLEAPCSCSGTVKYAHRDCIQRWCDEKGNTICEIC	233	scaffold294	-1	878807	880737
342	Lus10025071.g	Lus10025071	CH	CH	56	CMICYDMVRRSAPIWSCSSCYSIFHLHCIKKWVRAPTSIDMSADKHQGFNWRCPGC	1099	scaffold305	-1	114724	118023
343	Lus10025145.g	Lus10025145	HH	HH	42	CSICLGEFLDGERVRVLPNCNHEFHVLCIDKWLALHSSCPNC	150	scaffold305	-1	522352	522804
344	Lus10025146.g	Lus10025146	HH	HH	42	CSICLGEFLDGERVRVLPKCSHGFHVWCIDKWLTLHSSCPNC	172	scaffold305	-1	524409	524927
345	Lus10025162.g	Lus10025162	HH	HH	42	CAICLAEFAVGDEIRLLPQCGHGFHVKCIDTWLESHSSCPSC	179	scaffold305	1	591956	592495
346	Lus10025228.g	Lus10025228	HH	HH	42	CSICLGEFLDGERVRVLPKCNHEFHVLCIDKWLASHSSCPNC	149	scaffold339	-1	73517	73966
347	Lus10025338.g	Lus10025338	HH	HH	42	CPVCLSDFNEGEPVRSLPACSHLFHVACIDRWLQCHSNCPVC	172	scaffold339	1	800654	801172
348	Lus10025394.g	Lus10025394	CH	CH	62	CRICHLSSEGSMEVVAAAPGVVVTSMELIQLGCGCKDELGVAHSHCGEAWFKLKGNRVCEIC	273	scaffold46	-1	436282	437688
349	Lus10025563.g	Lus10025563	HH	HH	46	CAICLAEFEEGEEVEVLGNCGHGFHNHCIQRWFFISSSTNCSCPTC	183	scaffold145	-1	411450	412001
350	Lus10025566.g	Lus10025566	HC	HC	51	CGICFDVFTSNKIRSAACGHPYCTLCWSGYINASVNDGPGCLTLRCPDPSC	574	scaffold145	1	426880	432506
351	Lus10025612.g	Lus10025612	HH	HH	41	CPVCKEEFKVGGEARELPCKHIYHDECIVPWLRLHNSCPVC	351	scaffold145	1	650343	651398
352	Lus10025671.g	Lus10025671	HH	HH	41	CTVCLDEMLIGDQVACLPCEHLFHGSCIVQWLETSHLCPLC	264	scaffold145	1	922824	923677
353	Lus10025691.g	Lus10025691	HH	HH	42	CVICQAEYEEKEEVVELVGCGHAYHKECVTNWLLIRKNCPVC	228	scaffold145	-1	1016694	1017380
354	Lus10025921.g	Lus10025921	HC	HC	38	CCICMVRHKGAASSSCGHTYCRLCSRELMVQRGNCPLC	300	scaffold605	-1	943465	944508
355	Lus10025930.g	Lus10025930	HC	HC1 HC2	38 40	CVACKELLFLPVVLNCGHAFCECCIVRPVNGAIKCHVC CCICLDLLYKPVVLACGHMACFWCVHHSMSFRDQSHCPIC	412	scaffold605	-1	983010	985188
356	Lus10026104.g	Lus10026104	HC	HC	52	CEICADRKEPEHMLKIGGGCSHASYCSDCIARHVTTKVSESVVTVTCPAAGC	348	scaffold319	1	699248	700673
357	Lus10026226.g	Lus10026226	HH	HH	41	CSICQEEYEEGDELGGLKCEHKYHMKCIHQWLRLKNWCPVC	496	scaffold898	-1	233566	235644
358	Lus10026380.g	Lus10026380	HH	HH	42	CVICLSGFGDGEVGRCLSGCGHGFHVECIDMWLLSHSSCPIC	915	scaffold898	1	856601	866009
359	Lus10026420.g	Lus10026420	CH	CH	47	CPICYSVIHTDNRSLPRLACRTCKYKFHSACLYKWFSTSHKSSCPLC	1880	scaffold898	-1	1019877	1030162
360	Lus10026501.g	Lus10026501	CH	CH	48	CRICMVELGEGAESLKMECSCKGELALAHQECAVKWFSIKGNKMCDVC	545	scaffold617	-1	110371	113055
361	Lus10026648.g	Lus10026648	HC	HC	55	CPICWESFNIVENVPYVLWCGHSLCQNCVLALQCTVWQFHAQHFKVPFLISCPWC	513	scaffold617	1	816677	820656
362	Lus10026856.g	Lus10026856	HC	HC	46	CGICFETYPCDKLHAAACGHPFCSSCWAGYTGTAINDGPGCLMLRC	589	scaffold651	-1	179985	190377
363	Lus10026941.g	Lus10026941	HH	HH	41	CSICQEEYANEEELGGLRCEHKYHLNCIQQWLRVKNWCPVC	513	scaffold651	1	690464	692676
364	Lus10027023.g	Lus10027023	HH	HH	46	CAICLAEFEEGEEVELLGNCGHGFHNQCIQRWFFISSSTNCSCPTC	174	scaffold297	-1	126253	126777
365	Lus10027027.g	Lus10027027	HC	HC	51	CGICFDVFPSNKIRSAACGHPYCTLCWSGYINASVNDGPGCLTLRCPDPSC	560	scaffold297	1	145836	151453
366	Lus10027441.g	Lus10027441	HC	HC	50	CAVCLERQCNVAAEGCGHELCVRCALYLCSTSNMPTEMSGQPGSIPCPLC	504	scaffold96	1	362587	365274
367	Lus10027736.g	Lus10027736	HH	HH	42	CVICIGELEEGETVRFMPRCRHVFHAACVDHWLLAHSSCPMC	160	scaffold1143	-1	154671	155153
368	Lus10027744.g	Lus10027744	CH	CH	49	CRICQLGNLESDGIMMELGCSCKDDLAAAHKLCAETWFKIKGNRTCEIC	241	scaffold1143	-1	190882	192556
369	Lus10027890.g	Lus10027890	CC	CC	47	CHQCQRNDKGSVVRCTKCKTKRYCFPCIERWYPKMTHDEVAAACPFC	1071	scaffold1143	-1	800547	805055
370	Lus10027921.g	Lus10027921	HC	HC	43	CPICFGEFAVACKANCGHWYCGGCILQFWNYSAASRPCKCPMC	246	scaffold1143	1	967447	969188
371	Lus10027994.g	Lus10027994	HC	HC	35	CVICLENEYNAVFLPCGHMCCCTTCCSHLSSCPLC	345	scaffold132	-1	237717	239945
372	Lus10028009.g	Lus10028009	HD	HD	40	CTICFEEMGGGRVIRLECEHVFDESCLVSWLQNSNACPLC	153	scaffold132	1	313261	313722
373	Lus10028063.g	Lus10028063	HH	HH	41	CPVCKEEFKVGGEARELPCKHIYHDECIVPWLRLHNSCPVC	357	scaffold132	1	595314	596387
374	Lus10028249.g	Lus10028249	CH	CH	51	CRICHMSLDEESGGGLPIDLGCSCKDDLAASHRHCAEAWFKIKGNKTCEIC	218	scaffold327	-1	855418	856692
375	Lus10028406.g	Lus10028406	HH	HH	42	CSVCLQDFQLGETVRSLPQCHHMFHLPCIDKWLIQHASCPLC	235	scaffold413	1	513810	515194
376	Lus10028443.g	Lus10028443	HH	HH	42	CVICLEDYKDGEVLKVLPCKHEFHSSCVGSWLTKWGTFCPVC	322	scaffold413	-1	660333	661686
377	Lus10028454.g	Lus10028454	HH	HH	43	CSICLGEYQKGECLRLLPKCGHVFHKGCIDLWLSTRSSNCPIC	204	scaffold413	-1	712861	713475
378	Lus10028560.g	Lus10028560	HC	HC	45	CPVCLQSYDGDETLPRVLPCGHTACESCLKSLPERYHLTVRCPAC	783	scaffold346	1	109932	112706
379	Lus10028597.g	Lus10028597	CC	CC	46	CQICGDSVGLTANGDVFVACNECAFPVCHPCYEYERKDGTQACPQC	1079	scaffold346	1	314099	319251
380	Lus10028773.g	Lus10028773	HH	HH	43	CAVCLYEFEDEDEIRILANCKHVFHKECLDRWVGYERRTCPMC	167	scaffold540	1	185670	186173
381	Lus10028790.g	Lus10028790	HC	HC	35	CKVCFESATAAILLPCRHFCLCKSCSLACTECPIC	1119	scaffold540	1	285969	293752
382	Lus10028827.g	Lus10028827	HC	HC	39	CCVCCDSHIDSLLYRCGHMCTCTKCANELVRSDGKCPLC	795	scaffold540	1	444688	448501
383	Lus10029037.g	Lus10029037	HH	HH	42	CAICLGEFVDGEKVRVLPKCNHGFHVRCVDAWLVSHSSCPTC	172	scaffold376	-1	205042	205560
384	Lus10029136.g	Lus10029136	HC	HC	35	CRACKAREVSVLLMPCRHLCLCIDCDMFVNVCPVC	292	scaffold376	1	716896	717862
385	Lus10029178.g	Lus10029178	HH	HH	42	CAVCLCEFSDKDKLRLLPICSHAFHIDCIDAWLLSNSTCPIC	360	scaffold376	-1	916843	917925
386	Lus10029242.g	Lus10029242	CH	CH	66	CRICHLGSEGSIEGVSSADHPSGGVSGSSMELIQLGCGCKDELGVAHPHCAEAWFKLKGNRVCEIC	247	scaffold360	1	159965	161367
387	Lus10029245.g	Lus10029245	CC	CC	46	CNTCGEAIGVNPNGELFVACHECNFPMCKSCVEYETKEGRKACLRC	988	scaffold360	-1	168904	172770
388	Lus10029292.g	Lus10029292	HC	HC	41	CNICFDLASDPVVTCCGHLFCWACLYRWLHIHSDAKECPVC	433	scaffold360	1	491093	492394
389	Lus10029351.g	Lus10029351	HH	HH	41	CSICLEEFSSNDPSTLTKCRHEYHLQCILEWCQRSSDCPMC	314	scaffold360	1	786767	788594
390	Lus10029456.g	Lus10029456	HH	HH	42	CAICLCEFEEGEELKTLPECMHSFHVGCIDMWLYSHSNCPMC	108	scaffold55	1	63868	64194
391	Lus10029582.g	Lus10029582	HH	HH	41	CCICLSAYDDGVEIRELPCGHHFHCICVDKWLHLNATCPLC	320	scaffold418	-1	89710	92096
392	Lus10029693.g	Lus10029693	HH	HH	45	CVICQVEYEQDDHQDAVWEIVGCGHPYHKDCITDWLMVKKSCPIC	252	scaffold418	-1	725332	726090
393	Lus10029794.g	Lus10029794	HH	HH	42	CAVCLCEFEDHETLRLIPKCSHVFHSDCIDAWLVSHVTCPVC	447	scaffold416	-1	33077	34420
394	Lus10029886.g	Lus10029886	HH	HH	45	CSICLEGVTDTGDRSWAKLQCGHQFHLDCIGSAFNIKGAMQCPNC	407	scaffold416	-1	509293	512050
395	Lus10029940.g	Lus10029940	HC	HC	49	CPICLGLFIQESYLVTCFHKFCFKCILQWSKVVAGKHSGAQSSVKCPLC	246	scaffold416	1	745754	746978
396	Lus10029990.g	Lus10029990	HC	HC	38	CPICMQIIKDAFLTACGHSFCHTCIITHLRNKSDCPCC	677	scaffold416	1	961137	966243
397	Lus10029993.g	Lus10029993	HC	HC	38	CCVCMERDKGAAFIPCGHTFCRVCSKDLWARRGCCPIC	113	scaffold416	-1	996291	996632
398	Lus10030044.g	Lus10030044	HC	HC	40	CGVCHDPADDPVVSSCEHVFCKACLLDYSASLGQALCPTC	1025	scaffold416	-1	1215341	1220917
399	Lus10030117.g	Lus10030117	HH	HH	42	CYICLSEYEEGDKIRVLPCHHEYHMSCVDKWLKEIHGVCPLC	546	scaffold19	1	945759	948739
400	Lus10030120.g	Lus10030120	HH	HH	41	CPICIDGFKVEEQVVHLPCVHKFHTKCLLPWLLTNAHCPCC	202	scaffold19	-1	977137	978023
401	Lus10030199.g	Lus10030199	HH	HH	49	CCICSCALSKNTSSFLVRVFNCGHATHLECEFLDTESSSKGSPSGCPVC	1675	scaffold217	-1	182769	190781
402	Lus10030248.g	Lus10030248	HC	HC	36	CPVCTNSMYPPIHQCQNGHTLCSTCKTMVHNRCPTC	333	scaffold217	1	424892	426574
403	Lus10030375.g	Lus10030375	HC	HC	49	CFICLETVFDPVSLRCGHIFCYICACSAASVTIVDGLQSADPQRKCPLC	341	scaffold217	1	1109800	1111306
404	Lus10030464.g	Lus10030464	HH	HH	42	CVICLDEWKKEGEVVKEMPCKHRFHGGCVETWLRVHGSCPVC	242	scaffold917	-1	244175	244903
405	Lus10030472.g	Lus10030472	CH	CH	46	CRICQEEDSVENLESPCGCSGSLKYAHRKCVQHWCNEKGDTICEIC	314	scaffold917	1	275128	276816
406	Lus10030512.g	Lus10030512	HC	HC	51	CPICHEKLSDEKMVFQCGHFICCKCLLAMTEPKEPQDRKFQLLKWVMCPTC	641	scaffold917	1	505411	508197
407	Lus10030597.g	Lus10030597	HC	HC	35	CRSCKTREVSVLLMPCRHLCLCMDCDVFINVCPVC	330	scaffold917	1	927605	929036
408	Lus10030599.g	Lus10030599	HC	HC	35	CRSCKTREVSVLLMPCRHLCLCMDCDVFINVCPVC	330	scaffold917	1	937687	939118
409	Lus10030699.g	Lus10030699	HC	HC	55	CPICWESFNIVENVPYVLWCGHTLCKNCIFGLQWAVVKFPTLPVQLPLFISCPWC	269	scaffold373	1	178057	178866
410	Lus10030728.g	Lus10030728	HH	HH	42	CAICLSEFAAGDELRVLPQCGHGFHVSCIDTWLGSHSSCPSC	206	scaffold373	-1	296300	296920
411	Lus10030755.g	Lus10030755	HH	HH	41	CPVCKDQFEAGSEARQMPCNHMYHSDCIVPWLEQHNSCPVC	307	scaffold373	1	400074	400997
412	Lus10030891.g	Lus10030891	HC	HC	35	CRSCKAKEVSVLLMPCRHLCLCMDCDVFINVCPVC	272	scaffold373	-1	1067548	1068842
413	Lus10030972.g	Lus10030972	HH	HH	42	CAICLAEFEDVDLIRLLTVCYHVFHLPCIDLWLQSNKSCPVC	324	scaffold261	1	315660	316634
414	Lus10031152.g	Lus10031152	HH	HH	42	CAICREPMAKAKRLHCSHLFHLPCLRSWLDQGLNDMYSCPTC	611	scaffold977	-1	278776	282577
415	Lus10031202.g	Lus10031202	HC	HC	35	CRKCGKEESCVLLLPCRHLCLCTGCESAIHSCPIC	331	scaffold977	-1	577669	578852
416	Lus10031275.g	Lus10031275	HH	HH	41	CVICQMEYKRGEKRITLPCKHIYHASCGSKWLSINKACPIC	222	scaffold977	-1	917028	918387
417	Lus10031422.g	Lus10031422	HH	HH	41	CAVCKDMIDVGEMETKLPCGHGYHGECIVPWLGSRNSCPVC	306	scaffold863	-1	267017	267937
418	Lus10031468.g	Lus10031468	HC	HC	42	CGICFTEEDKRRLRGTLDCCNHYFCFKCIMEWSKVESRCPLC	584	scaffold863	-1	435475	437649
419	Lus10031491.g	Lus10031491	HH	HH	45	CSVCLEAVTDAGERSWAKLQCGHQFHLDCIGSAFNTKGAMQCPNC	398	scaffold863	-1	536507	538665
420	Lus10031515.g	Lus10031515	HH	HH	42	CAVCLNEFDDDETLRLIPNCDHVFHPECIDAWLESHTTCPVC	328	scaffold863	-1	649869	650944
421	Lus10031549.g	Lus10031549	HH	HH	43	CNHCKLPGDDCPLIWGQCNHAFHLHCILKWVNSQTSQAHCPMC	239	scaffold863	-1	823203	825286
422	Lus10031618.g	Lus10031618	HH	HH	111	CGVCKRKILNMGMDYRLSRGYTSVGPIAPFYVFPCGHAFHSECLIAHVTRCTTESHAERILDLQKQLTLLGDGARKDQNGSMFDDPVSSTTNADKLRSQLDDAVAGECPFC	950	scaffold863	-1	1111853	1119459
423	Lus10031728.g	Lus10031728	HH	HH	42	CAICREPMAKAKRLHCSHLFHLPCLRSWLDQGLNDMYSCPTC	587	scaffold783	-1	427161	430976
424	Lus10031780.g	Lus10031780	HC	HC	35	CRKCGEEESCVLLLPCRHLCLCSGCESTIHSCPIC	329	scaffold783	-1	676130	677309
425	Lus10031993.g	Lus10031993	HC	HC	47	CPICLEQPLCPQITSCGHIFCFPCIVRYLLMGQEDFKGDCYKRCPLC	714	scaffold42	-1	435024	438655
426	Lus10032119.g	Lus10032119	HC	HC	39	CAICLEICFEPSTTSCGHSFCKKCLRSAADKCGKKCPKC	379	scaffold42	1	976271	977858
427	Lus10032161.g	Lus10032161	HH	HH	42	CAVCLCEFSEKDKLRLLPICSHAFHISCIDTWLLSNSTCPLC	377	scaffold42	-1	1178214	1179347
428	Lus10032265.g	Lus10032265	HH	HH	49	CSVCLDSIQYSNDDYPVGSTSVKKLACCHVFHEDCIRRWLAVKASCPLC	150	scaffold291	-1	387228	387680
429	Lus10032270.g	Lus10032270	HH	HH	41	CPTCLEEYDDENPRIITKCEHHFHLACILEWMERSDTCPVC	233	scaffold291	1	411038	412228
430	Lus10032290.g	Lus10032290	HH	HH	43	CAVCLYDFEEEDEIRNLANCRHVFHRSCLDRWMGYDRKTCPLC	179	scaffold291	-1	536616	537155
431	Lus10032382.g	Lus10032382	HH	HH	42	CPICLSEYEPKETLRTIPECNHYFHAECIDEWLKMNATCPLC	402	scaffold291	-1	1042401	1045751
432	Lus10032402.g	Lus10032402	HC	HC	39	CGICMDFIIDRGVLDCCQHWFCFGCIDSWASITNLCPLC	1204	scaffold291	1	1134319	1140829
433	Lus10032418.g	Lus10032418	HH	HH	42	CCVCLGEFEMKEELLQISSCRHVFHMDCIHHWLHTNSTCPLC	213	scaffold291	-1	1208095	1209382
434	Lus10032471.g	Lus10032471	HC	HC	35	CRVCFEGEINIVLLPCRHRILCSTCCEKCKKCPIC	450	scaffold140	-1	293170	298016
435	Lus10033053.g	Lus10033053	CH	CH	51	CRICLESDCEPGDELISPCMCKGTQQFVHRVCLDHWRAVKEGFAFSHCTTC	309	scaffold306	-1	422865	425675
436	Lus10033075.g	Lus10033075	HH	HH	41	CCICLATYGDDDELKELPCSHLFHASCVDIWLKLKAFCPLC	319	scaffold306	1	804770	806035
437	Lus10033252.g	Lus10033252	CH	CH	46	CRVCQQDKEEVLIDLGCKCKGGLAKSHRSCIDAWFLTRGSNKCEIC	258	scaffold488	-1	236292	237746
438	Lus10033425.g	Lus10033425	HH	HH	42	CAICLEDYNVGELCRIMPECSHMFHVDCIDNWLNLKISCPMC	183	scaffold488	-1	1292708	1293259
439	Lus10033472.g	Lus10033472	HC	HC	45	CCICLSIWHDVVTVGPCLHNFCNGCFSEWLKRSQEKRSKVLCPQC	333	scaffold701	1	135871	138798
440	Lus10033515.g	Lus10033515	HH	HH	42	CVICLSDFAAGEKVKILPKCNHGFHVKCIDKWLRSHSSCPTC	246	scaffold701	-1	345525	346265
441	Lus10033682.g	Lus10033682	HH	HH	44	CAICLEEMEESGGERVIIRMGCGHMFHESCSVSWLRVSNFCPLC	199	scaffold701	-1	1088624	1089223
442	Lus10033697.g	Lus10033697	HC	HC	54	CNICLDPVQDPVVTLCGHLYCWPCIYRWLHSWTIGSSSVAADEKAVLHRQCPVC	211	scaffold701	1	1162508	1163143
443	Lus10033725.g	Lus10033725	HH	HH	111	CGVCKRKILNMGVDYRLSRGYTSVGPIAPFYVFPCGHAFHSECLIAHVTRCTTESQAERILDLQKQLTLLGDGARKDQNGSMFDEPVSSTTNADKLRSQLDDAVAGECPFC	958	scaffold701	1	1298714	1306491
444	Lus10033860.g	Lus10033860	HC	HC	41	CTICNRLFRDATTISECLHTFCRKCIYRRISNDGLESCPIC	437	scaffold222	-1	666557	669335
445	Lus10033969.g	Lus10033969	HH	HH	43	CPICYEYLFDSMKDTIVMKCGHTMHCECHYEMIKRDRFCCPIC	270	scaffold292	1	256916	258875
446	Lus10033985.g	Lus10033985	CH	CH1 CH2	47 47	CRICLDTIREGEKMKLECGCKGDLRLVHEECAVSWFSTKGNKVCEIC CRICLDACEEGNTLKMECSCKGDLRLVHEECAIKWFSTKGNKNCEVC	818	scaffold292	-1	361700	366745
447	Lus10034030.g	Lus10034030	HC	HC	39	CVICMTEPKDTAVLPCRHMCMCSECAKELRIQSNKCPIC	397	scaffold292	1	628184	630639
448	Lus10034049.g	Lus10034049	HH	HH	41	CSICLDPFTVQDPATVTNCKHEYHLQCILDWCQRSKECPIC	410	scaffold292	-1	806486	808483
449	Lus10034088.g	Lus10034088	HC	HC	45	CVICLIEFSATRGVLQCGHRFCYSCILDWARYLDSIRKPSTCPLC	593	scaffold292	-1	1050027	1053436
450	Lus10034153.g	Lus10034153	HH	HH	44	CAICLADYSDGDVLRLLPGCGHSFHVACVDPWLVKRKSITCPIC	172	scaffold292	1	1372219	1372737
451	Lus10034157.g	Lus10034157	HH	HH	42	CTVCLAEYHQGDMLRILPYCGHSFHVTCIDLWLQQHSTCPIC	226	scaffold292	-1	1385804	1387722
452	Lus10034165.g	Lus10034165	HC	HC	42	CSICLTALHDHRRTAVISACLHAYCLPCIRRWSEVKQRCPLC	330	scaffold292	-1	1420874	1422806
453	Lus10034346.g	Lus10034346	HH	HH	42	CPICCDDLFTSSATVRGLPCGHFMHSSCFQAYTNSHYVCPIC	1252	scaffold310	-1	781629	789366
454	Lus10034367.g	Lus10034367	HH	HH	60	CPTCLEGVNLTFPSRCLFDALLCFVEYSPENPKIMTKCSHHFHLGCIYEWMERSDSCPVC	229	scaffold310	1	920017	922003
455	Lus10034407.g	Lus10034407	HH	HH	42	CSICQARIQQSEQVTELRCNHLFHRACLDRWFRSSDLTCPLC	137	scaffold310	1	1153684	1154097
456	Lus10034454.g	Lus10034454	CH	CH	46	CRICQEEDSLVNLEVPCACSGSLKYAHRKCVQRWCNEKGDINCEIC	291	scaffold310	-1	1390088	1392671
457	Lus10034470.g	Lus10034470	CH	CH	56	CMICYDMVRRSAPIWSCSSCYSIFHLHCIKKWVRAPTSIDMSADKNQGFNWRCPGC	1100	scaffold310	1	1481502	1484804
458	Lus10034551.g	Lus10034551	HH	HH	42	CAVCLDEIEEEQTARRIPVCNHGFHVECADKWLSNNPFCPVC	121	scaffold9	1	525563	525928
459	Lus10034587.g	Lus10034587	HH	HH	41	CCICLTSYEDGAELNALPCNHHFHSSCIVRWLKMNATCPLC	550	scaffold9	-1	748471	758578
460	Lus10034640.g	Lus10034640	CH	CH	46	CRICQDDDVDSNMETPCSCCGSLKYAHRRCIQKWCNEKGNTICEIC	294	scaffold9	-1	1161961	1164126
461	Lus10034644.g	Lus10034644	HH	HH	41	CTVCQEEFEGGNELGKLECGHGFHLECIKQWLANKNTCPVC	255	scaffold9	-1	1182486	1184653
462	Lus10034667.g	Lus10034667	HH	HH	41	CAICKENLVVDDKMQELPCKHTFHPPCLKPWLDEHNSCPIC	311	scaffold9	-1	1312630	1314076
463	Lus10034793.g	Lus10034793	HH	HH	39	CTIFLEEMGCREGKVIRLDCKHEFHESCLISWLRKSNCC	181	scaffold66	1	522159	522921
464	Lus10034832.g	Lus10034832	CH	CH	48	CRICLDYEGDDLIAPCHCKGTQKYVHRSCLDNWRSTKEGFAFAHCTEC	488	scaffold66	-1	823878	829493
465	Lus10034953.g	Lus10034953	HH	HH	42	CAVCISKFEDVEILRLLPKCKHAFHINCIDQWLERHSSCPIC	390	scaffold29	1	642509	643681
466	Lus10035010.g	Lus10035010	CH	CH	46	CRICQEEDSLMNLETPCACSGSLKYVHRKCVQRWCNEKGDVICEIC	293	scaffold43	1	11912	14127
467	Lus10035023.g	Lus10035023	HH	HH	40	CPVCLERLDQDMGGILTTICNHSFHCSCISKWADSSCPVC	501	scaffold43	-1	79548	83055
468	Lus10035057.g	Lus10035057	HC	HC	35	CRICFEEQINVVILPCRHHALCSTCCEKCKKCPIC	413	scaffold43	1	285360	289381
469	Lus10035163.g	Lus10035163	HC	HC	47	CPICLEQPLCPQITSCGHIFCFPCIVRYLLMGQEDFKGDCYKRCPLC	732	scaffold43	-1	884078	887752
470	Lus10035271.g	Lus10035271	CH	CH	46	CRICQDDDVDSNMETPCSCCGSLKYAHRRCIQKWCNEKGNTTCEIC	269	scaffold43	-1	1624119	1626003
471	Lus10035332.g	Lus10035332	HC	HC	38	CPICMQIIKDAFLTACGHSFCHMCIITHLRNKSDCPCC	677	scaffold151	1	283741	288836
472	Lus10035335.g	Lus10035335	HC	HC	38	CCVCMERDKGAAFIPCGHTFCRVCSKDLWARRGCCPIC	111	scaffold151	-1	318037	318372
473	Lus10035368.g	Lus10035368	HH	HH	42	CAICLAEFEDVDLIRLLTVCYHVFHLPCIDLWLQSNKTCPVC	324	scaffold151	1	460493	461467
474	Lus10035549.g	Lus10035549	CH	CH	49	CRICQLGNLESDGIMIELGCSCKDDLAAAHKLCAETWFKIKGNKTCEIC	240	scaffold464	1	227986	229022
475	Lus10035553.g	Lus10035553	HH	HH CH	41 40	CVICIGELEEGETKRFMPRCGHVFHASCVDHWLLAQSSCLC CIVCADGGNLVLCDGCPRAFHKGCASLPSIPRGDWYCNYC	1218	scaffold464	1	249096	258482
476	Lus10035677.g	Lus10035677	HH	HH	42	CSVCLFEFHEGDTLRLLPKCDHAFHLDCIDTWLATHSTCPLC	369	scaffold464	-1	873562	874671
477	Lus10035820.g	Lus10035820	HH	HH	57	CLICERDLSFAPVPPETEMGTCNFPEVAVLPCGHVFHMICLDTVSANQPFEPTCFMC	348	scaffold464	-1	1471962	1473096
478	Lus10035857.g	Lus10035857	HC	HC	38	CCICYTSEADAQFGPCLHRSCYGCITRHLLNSHRCFFC	1252	scaffold464	1	1656264	1663107
479	Lus10035931.g	Lus10035931	HH	HH	44	CAICLSDYIQGERLLLRLLPKCDHVFHLKCIDRWLTFHLTCPVC	182	scaffold76	1	314659	315207
480	Lus10036034.g	Lus10036034	HC	HC	43	CAICLDKIVLEETALIKGCEHAYCVTCILRWAMYSKNQNCPQC	259	scaffold76	1	822376	824409
481	Lus10036127.g	Lus10036127	HC	HC	49	CVICYEDTDTAQMFPIDNCLHRYCFSCMKQHVEVALLNGKDAKCPHVGC	600	scaffold76	-1	1357671	1360198
482	Lus10036128.g	Lus10036128	HC	HC	49	CVICLEDTDVERMFAVDRCSHWFCFTCMKQHVEVKLLHGIVPKCPSDGC	541	scaffold76	-1	1363312	1365996
483	Lus10036138.g	Lus10036138	CC	CC	48	CPLCAEEMDLTDQQLKPCKCGYEICVWCWHHIMDMAEKDASEGRCPAC	1039	scaffold76	1	1432719	1437651
484	Lus10036140.g	Lus10036140	CC	CC	48	CPLCAEEMDLTDQQLKPCKCGYEICVWCWHHIMDMAEKDASEGRCPAC	973	scaffold76	1	1441043	1445681
485	Lus10036151.g	Lus10036151	HC	HC	38	CPICLSLLSFAVSLSCNHVFCNSCISQAMKSHSDCPIC	883	scaffold76	-1	1509834	1513933
486	Lus10036202.g	Lus10036202	HC	HC1 HC2	49 42	CSICCEDKMLSMMITMKCSHKFCSHCMRTYVEGKVESSQVPVRCPQLGC CQLCRSMIELSQGCYHMTCWCGHEFCYSCGAEYRDDQQTCQC	535	scaffold27	-1	136639	139221
487	Lus10036378.g	Lus10036378	HH	HH	43	CAVCLYDFEGEDEIRWLKSCRHVFHRACLDRWMDHDRSTCPLC	200	scaffold57	-1	359120	359722
488	Lus10036380.g	Lus10036380	HH	HH	42	CSICLGEFSDGEKVRVLPECNHGFHVVCIDGWLALHSSCPNC	158	scaffold57	-1	373244	373720
489	Lus10036404.g	Lus10036404	HH	HH	42	CSICLCEYKDLEMMRMMPECRHYFHLWCLDAWLKLNGSCPVC	122	scaffold57	1	502623	502991
490	Lus10036466.g	Lus10036466	HH	HH	42	CAICISEFEDAETLRLIPKCSHVFHVDCIDAWLVSNTTCPVC	390	scaffold57	-1	748866	750038
491	Lus10036569.g	Lus10036569	HH	HH	41	CCICLSSYDDETEVRELPCRHHFHCTCIDKWLYINATCPLC	380	scaffold57	1	1268313	1269888
492	Lus10036754.g	Lus10036754	CH	CH	46	CRICQEEDSIHNLESPCVCSGSLKYAHRKCVQHWCNEKGDITCEIC	272	scaffold31	-1	460875	462214
493	Lus10036757.g	Lus10036757	HH	HH	41	CVICLVEWSQGEVVKEMPCKHRFHGGCVEKWLGVHGSCPVC	207	scaffold31	1	474622	475245
494	Lus10036764.g	Lus10036764	HH	HH	59	CGLCERFLSHRSPYSSRRITITGTMPPSAVLSCRHVFHSECLDQITPVSHSSDPPCPIC	290	scaffold31	-1	518901	520281
495	Lus10036934.g	Lus10036934	HC	HC	38	CGICMETGSKMVLPGCGHSLCMSCFHDWNNRSQSCPFC	255	scaffold31	-1	1284465	1285940
496	Lus10036937.g	Lus10036937	HC	HC	38	CGICLEPCTKMVLPNCCHAMCIKCYRNWNTRSESCPFC	259	scaffold31	1	1302491	1304219
497	Lus10037053.g	Lus10037053	HC	HC	38	CGICMETGSKMVLPDCGHSLCMNCFHDWNNRSKSCPFC	256	scaffold462	1	16512	17961
498	Lus10037162.g	Lus10037162	HH	HH	59	CGLCERFLSHRSPYSSRGITITRTMPPSAVLSCRHVFHSECLDQITPVSHLSDPPCAIC	708	scaffold462	1	463005	477123
499	Lus10037170.g	Lus10037170	HH	HH	41	CVICLVQWSQGEVVKEMPCKHRFHGGCVEKWLGVHGSCPVC	208	scaffold462	-1	528218	528844
500	Lus10037172.g	Lus10037172	CH	CH	46	CRICQEEDSIHNLESPCGCSGSLKYAHRKCVQHWYNEKGDITCEIC	274	scaffold462	1	540652	542010
501	Lus10037264.g	Lus10037264	HH	HH	42	CSVCLSEFHEGDTLRLLPKCDHAFHLDCIDTWLTTHSTCPLC	353	scaffold462	-1	1043560	1044621
502	Lus10037391.g	Lus10037391	HH	HH	44	CPICLTTVKAGRGDAIFTTECSHSFHFHCIASNIKHGKEICPVC	299	scaffold462	1	1634389	1636221
503	Lus10037410.g	Lus10037410	CH	CH	48	CRICLVELCEGGETLKMECSCKGELALAHQECAVKWFSIKGNKTCDVC	531	scaffold462	-1	1710059	1712657
504	Lus10037412.g	Lus10037412	HC	HC	39	CVICLSEPRDTTVLPCRHMCLCSGCAKVLQFQTNRCPIC	342	scaffold462	-1	1721949	1723737
505	Lus10037490.g	Lus10037490	HH	HH	42	CAVCLSEFEDKEKGRTLPHCKHSFHTECIDMWFHSHSTCPLC	433	scaffold196	-1	235459	237564
506	Lus10037580.g	Lus10037580	HC	HC	41	CPICQATPSIPFLAHPCQHRYCYYCLRTRCAATPSFRCPRC	344	scaffold196	1	620909	623466
507	Lus10037812.g	Lus10037812	CC	CC	47	CHQCQRKDRSRVLWCLKCDKRGFCDNCIAAWYPDIPWEEIEKVCPAC	934	scaffold196	-1	1687959	1692235
508	Lus10037906.g	Lus10037906	CH	CH	47	CRICLDACEEENTLKMECGCRGDLRLVHESCAVKWFSTKGNRTCEVC	454	scaffold475	1	292729	295125
509	Lus10037928.g	Lus10037928	HC	HC	39	CCICCDSQIDSLLYRCGHMCTCSKCANELVRGGGKCPLC	861	scaffold475	-1	399497	403912
510	Lus10038048.g	Lus10038048	HC	HC	41	CAVCADNLEWVAYGPCGHRDVCSTCVVRLRFICQDQRCCIC	739	scaffold475	1	1016399	1019558
511	Lus10038095.g	Lus10038095	HC	HC	43	CPICLERLDPDTSGILSTLCDHSFQCSCTSKWTYLSCQVCRLC	481	scaffold475	-1	1507874	1510643
512	Lus10038169.g	Lus10038169	HC	HC1 HC2	40 38	CCICLDLLYKPVVLACGHMACFWCVHHSMSFRDQSHCPIC CVACKELLFLSVVLNCGHAFCECCIVRPVNGAIKCHVC	958	scaffold28	1	128293	136361
513	Lus10038180.g	Lus10038180	HC	HC	38	CCICMVRHKGAASSSCGHTYCRLCSRELMVQRGNCPLC	304	scaffold28	1	177412	178462
514	Lus10038341.g	Lus10038341	HC	HC1 HC2	49 42	CSICCEEKMLSMMITMKCSHKFCSHCMRTYVEGKVESSQVPVRCPQLGC CQQCRSMIELTQGCYHMTCWCGHEFCYSCGAEYRDDQQTCQC	536	scaffold28	-1	786726	789494
515	Lus10038632.g	Lus10038632	CH	CH	47	CRICLDACEEENTLKMECGCRGDLRLVHESCAVKWFSTKGNRICEVC	429	scaffold37	1	956718	959114
516	Lus10038656.g	Lus10038656	HC	HC	39	CCICCDSQIDSLLYRCGHMCTCSKCANELVRGGGKCPLC	858	scaffold37	-1	1249158	1255092
517	Lus10038731.g	Lus10038731	HC	HC1 HC2 CH	39 57 46	CAFCMQLPERPVTTPCGHNFCLKCFEKWTGQKKSTCAKC CHLCRQVMNVPVTTPCSHNFCKECLDKKFPDKKFVQERGRGGRTLRSKKIVLNCPCC CMVCKVKPPAEETLTCSTCAAPWHVPCLATPIESLASVLQWECPDC	603	scaffold34	-1	32280	35291
518	Lus10039001.g	Lus10039001	HC	HC	39	CPICITPPTDTIITCCAHIFCRLCIMKVMKQDKSRCPLC	853	scaffold34	-1	1217650	1220568
519	Lus10039127.g	Lus10039127	HC	HC1 HC2 CH	57 39 46	CHLCRQVMNVPVTTPCSHNFCKECLDKKFPDKKFVQERGRGGRTLRSKKIVLNCPCC CAFCMQLPERPVTTPCGHNFCLKCFEKWMGQKKSTCAKC CMVCKVKPPAEETLTCSTCAAPWHVPCLATPIESLASVLQWECPDC	630	scaffold34	1	1770602	1773685
520	Lus10039202.g	Lus10039202	HC	HC	36	CPVCMNLIYPPIYQCPNGHTLCSNCKSRVHNSCPTC	308	scaffold34	1	2081557	2082763
521	Lus10039607.g	Lus10039607	CC	CC	46	CQICGDSIGCTVKGDLFVACDVCPFPVCRPCYEYERKHGNQSCPQC	1069	scaffold15	1	730793	735736
522	Lus10039634.g	Lus10039634	HH	HH	45	CGICAHSVRTGQGTAIFTAECNHVFHFPCVTSHFTKHHLLLCPVC	424	scaffold15	1	897421	898782
523	Lus10039821.g	Lus10039821	HC	HC	55	CNICLDSVTEPVVTLCGHLYCWPCIYKWLNSAAGDNLDDDEDYYELQSHGRCPVC	229	scaffold15	-1	1779707	1780396
524	Lus10039845.g	Lus10039845	HC	HC	40	CPICLGIIKKTRTVMECLHRFCRECIDKSMRLGNNECPAC	563	scaffold15	-1	1884951	1888840
525	Lus10039848.g	Lus10039848	HH	HH	44	CVICMTSIDMMQRPSDCMVTPCDHFFHSGCLQRWMDIKMECPTC	537	scaffold15	-1	1897075	1900582
526	Lus10040151.g	Lus10040151	HH	HH	51	CCVCLDNMFPSAGACPPVKKTSCNHLFHADCILDWLLVSDQFGGGGYCPIC	170	scaffold86	-1	448581	449093
527	Lus10040240.g	Lus10040240	CH	CH	51	CRICHMSLDEESGGGLPIDLGCSCKDDLAASHRHCAEAWFKIKGNKTCEIC	213	scaffold86	1	914085	915291
528	Lus10040278.g	Lus10040278	HH	HH	41	CAVCKEPFESETEARQMPCKHLYHSDCILPWLSLRNSCPVC	248	scaffold86	1	1121291	1122037
529	Lus10040359.g	Lus10040359	HH	HH	38	CIICREEMTTAKKLVCGHLFHVHCLRSWLERQHTCPTC	516	scaffold86	-1	1506999	1509493
530	Lus10040389.g	Lus10040389	HH	HH	42	CAICLEEYKKGSRIGKLRKCGHEYHMGCIKKWLTVKNSCPIC	562	scaffold86	-1	1672077	1674755
531	Lus10040413.g	Lus10040413	HH	HH	44	CSICLTKMKEGGGQALFTAECSHSFHFHCIASNVKHGNQICPVC	679	scaffold86	-1	1795421	1798639
532	Lus10040508.g	Lus10040508	HC	HC	50	CEICMEDVPVNMSTSMDCRHCFCNDCWTEHFIVKINEGQSRRISCMAHKC	578	scaffold86	-1	2257110	2260209
533	Lus10040613.g	Lus10040613	HC	HC	36	CRKCGEKESSVLVLPCRHLCLCTVCGSTLVGTCPVC	343	scaffold156	1	692423	693631
534	Lus10040616.g	Lus10040616	HC	HC	49	CSICCEDKMSAMMITMKCSHKFCSHCMRTYVEDKMQSCQVPIRCPQPGC	443	scaffold156	1	713695	715474
535	Lus10040617.g	Lus10040617	HH	HH	45	CCICLMQMEIGGGSDLEMLPCQHKFHKVCIERWLMRKRRRTCPLC	148	scaffold156	1	716279	716725
536	Lus10040716.g	Lus10040716	CH	CH	52	CRICHLGLLSNEQESGVAIELGCSCKGDLAAAHKKCAETWFKIKGNMVCEIC	197	scaffold156	1	1145621	1147484
537	Lus10040783.g	Lus10040783	HH	HH	41	CAVCKEAFELGSEAREMPCKHIYHSDCILPWLAIRNSCPVC	267	scaffold156	1	1400527	1401330
538	Lus10040829.g	Lus10040829	HC	HC	49	CCICFEQVCTIEVQNCGHQMCANCTLALCCHNKPNPTTASLTPPVCPFC	379	scaffold156	-1	1678290	1680444
539	Lus10040914.g	Lus10040914	HC	HC	38	CFICREPFEDPVMTKCKHYFCEHCALKHHSKNKKCFVC	326	scaffold280	1	112043	113363
540	Lus10040942.g	Lus10040942	HH	HH	42	CCICLGTFEDGDKVKSLPRCHHCFHSECVDRWLLAHCDCPLC	186	scaffold280	-1	253229	253789
541	Lus10041008.g	Lus10041008	HC	HC	41	CRVCTDLPEDPVVTMCGHVFCYQCVSNYLAGDDNTCPGPDC	976	scaffold280	-1	531237	537735
542	Lus10041063.g	Lus10041063	CC	CC	46	CQICGDEIEITADGELFVACNECAFPVCRPCYEYERREGTQACPQC	1096	scaffold280	1	800678	806006
543	Lus10041079.g	Lus10041079	HH	HH	42	CSICLCEYKDLEMMRMMPECRHYFHLWCLDAWLKLNGSCPVC	214	scaffold280	1	872348	872992
544	Lus10041134.g	Lus10041134	HH	HH	42	CAICISEFEDAETLRLIPKCSHVFHVDCIDAWLISNTTCPVC	392	scaffold280	-1	1111234	1112412
545	Lus10041156.g	Lus10041156	HG	HG	40	CPICLESADDPVFTPCKHRMGRECLLASWRSETGGPCPLC	1101	scaffold280	1	1215362	1220407
546	Lus10041244.g	Lus10041244	HC	HC	40	CVMCLSEAMSVVFLPCAHQVVCTSCNELHEKKGMTDCPSC	901	scaffold280	-1	1580531	1583885
547	Lus10041245.g	Lus10041245	HC	HC	40	CVMCLSEAMAGVFLPCAHQVVCISCNELHEKKGMKDCPSC	890	scaffold280	-1	1585912	1588716
548	Lus10041246.g	Lus10041246	HC	HC	40	CVMCLSEAMSVVFLPCAHQVVCTSCNELHEKKGMKDCPSC	888	scaffold280	1	1589854	1593169
549	Lus10041300.g	Lus10041300	HC	HC	39	CVICLSEPRDTTVLPCRHMCLCSGCAKVLQFQTNRCPIC	342	scaffold280	1	1839889	1841924
550	Lus10041301.g	Lus10041301	CH	CH	48	CRICLVELCEGGETLKMECSCKGELALAHQECAVKWFSIKGNKTCDVC	1341	scaffold280	1	1843536	1852892
551	Lus10041321.g	Lus10041321	HH	HH	44	CPICLTTVKAGRGHAIFTAECSHSFHFHCIASNVKHGKEICPVC	734	scaffold280	-1	1923284	1926714
552	Lus10041359.g	Lus10041359	HH	HH	41	CCICLSAYDDGTEVRELPCRHHFHCTCIDKWLYINATCPLC	379	scaffold280	-1	2101379	2102950
553	Lus10041603.g	Lus10041603	HC	HC	35	CMICQALLFDCAKCIPCSHVFCKVCVSRFKDCPLC	1395	scaffold272	-1	877559	892662
554	Lus10041689.g	Lus10041689	HC	HC	39	CSVCSDRPKEVVIVKCYHLFCNPCIQRNLELRHRKCPGC	881	scaffold272	1	1290676	1297808
555	Lus10041859.g	Lus10041859	HH	HH	42	CSVCLQDFQLGETVRSLPQCHHMFHLPCIDKWLIQHASCPLC	235	scaffold272	1	2084361	2085726
556	Lus10041896.g	Lus10041896	HH	HH	42	CVICLEDYKDGEVLKVLPCKHEFHSSCVGSWLTKWGTFCPVC	333	scaffold272	-1	2237340	2238944
557	Lus10041907.g	Lus10041907	HH	HH	43	CSICLGEYQKGECLRLLPKCGHVFHKGCIDLWLSTRSSNCPIC	685	scaffold272	-1	2298818	2302219
558	Lus10041970.g	Lus10041970	HH	HH	59	CGICLKLLTDRSLWSAQKLIANNELPVVAILTCGHVYHAECLETLTHEIAKYDPSCPIC	438	scaffold123	-1	166013	168147
559	Lus10042126.g	Lus10042126	HH	HH	41	CPICLEEFHVGNEVRGLPCAHNFHVECIDEWLRLNVKCPRC	364	scaffold123	-1	814179	816108
560	Lus10042156.g	Lus10042156	CC	CC	42	CPICCEDLDPTDSSFSPCTCGFRLCLFCHKRILEEDGRCPSC	348	scaffold123	-1	938024	939394
561	Lus10042171.g	Lus10042171	HH	HH	41	CVICMEEFGIGSEAARMGCLHSYHVDCIRNWLCKSPTCPLC	199	scaffold123	-1	1023299	1023898
562	Lus10042188.g	Lus10042188	HH	HH	42	CPICRESIFTSSIPVKALPCGHLMHSPCFQEYTCNHYICPIC	176	scaffold123	-1	1117107	1118366
563	Lus10042190.g	Lus10042190	HH	HH	42	CPICYGSIFTSSITVKDTRCGHLMHAPCFQDYTSHHYTCPIC	615	scaffold123	-1	1130010	1133541
564	Lus10042277.g	Lus10042277	HH	HH	42	CVICLSGFGDGEVGRCLSGCGHGFHVECIDMWLLSHSSCPIC	248	scaffold123	-1	1498788	1499534
565	Lus10042348.g	Lus10042348	HC	HC	50	CEICMEEVRANMSTRIDCGHCFCNDCWTEHFIVKINEGQSRRIRCMAFKC	594	scaffold123	1	1776422	1780555
566	Lus10042443.g	Lus10042443	HH	HH	41	CSICQEEYEEGDELRGLKCEHKYHMKCIHQWLRLKNWCPVC	529	scaffold123	1	2163911	2165995
567	Lus10042532.g	Lus10042532	HC	HC	41	CRLCNNLFRQPTAISLCLHTFCRKCIYNRLSDGGVGTCPVC	399	scaffold67	1	184379	186806
568	Lus10042890.g	Lus10042890	HC	HC	39	CSVCHDRPKEVVITKCYHLFCNPCVQRITETRHRKCPVC	894	scaffold67	1	2621769	2630411
569	Lus10042969.g	Lus10042969	HC	HC	35	CRVCFEGEINIVLLPCRHRILCSTCCEKCKKCPIC	450	scaffold25	-1	354966	359830
570	Lus10043027.g	Lus10043027	HH	HH	49	CSVCLEGARVGTSSDAGGGAWKKVPCCGHVYHAECISSWLSHRDSCPLC	125	scaffold25	-1	783476	783853
571	Lus10043353.g	Lus10043353	HH	HH	54	CAVCLNQMKEEDEVRELRNCCHVFHKDCIDRWIDHELDDQEEDDESNRRTCPLC	196	scaffold25	-1	2488851	2489441
572	Lus10043365.g	Lus10043365	HC	HC	40	CPICLEAFEDAVLTPCAHRLCRECLLSSWRNASSGLCPVC	1072	scaffold25	1	2547952	2554864
573	Lus10043426.g	Lus10043426	HH	HH	42	CTVCLAEYHQGDMLRILPYCGHSFHVTCIDLWLQQHSTCPIC	226	scaffold25	1	2804730	2806734
574	Lus10043428.g	Lus10043428	HH	HH	44	CAICLADYSDGHLLRLLPGCGHSFHLACVDPWLMKRKSITCPIC	860	scaffold25	-1	2808707	2814164
