# Supplementary material for: Genome-wide identification of RING finger genes in flax (Linum usitatissimum) and analyses of their evolution
Source: PeerJ. 2021 Nov 15;9:e12491. doi: 10.7717/peerj.12491 (PMC8601054; doi:10.7717/peerj.12491)
Supplement: Supplemental Information 13 [file peerj-09-12491-s013.xls]

## Sheet: Table SX
Table S2. Flax RING domain containing protein groups based on the presence and organization of additional domain(s)
Group NO.	Number of proteins	Transcript Name	RING typea	Representative domain architectureb	Additional domainc
1	188	Lus10000845	C2		none
1		Lus10000885	HH		none
1		Lus10001209	HC		none
1		Lus10001530	HC		none
1		Lus10001535	HC		none
1		Lus10001582	HH		none
1		Lus10001611	HH		none
1		Lus10001654	HH		none
1		Lus10001683	HH		none
1		Lus10001685	HH		none
1		Lus10002113	HH		none
1		Lus10002369	HH		none
1		Lus10002491	HC		none
1		Lus10002554	HH		none
1		Lus10002584	HC		none
1		Lus10002761	HC		none
1		Lus10003261	HC		none
1		Lus10003551	HC		none
1		Lus10003617	HH		none
1		Lus10003992	HH		none
1		Lus10004001	HC		none
1		Lus10004162	HC		none
1		Lus10004246	C2		none
1		Lus10004419	HC		none
1		Lus10004467	HC		none
1		Lus10004636	HH		none
1		Lus10004821	HC		none
1		Lus10005084	HH		none
1		Lus10005237	HH		none
1		Lus10005389	HH		none
1		Lus10005818	HH		none
1		Lus10005859	HC		none
1		Lus10006253	HC		none
1		Lus10006279	HH		none
1		Lus10006447	HC		none
1		Lus10006448	HC		none
1		Lus10006449	HH		none
1		Lus10006558	HC		none
1		Lus10007106	ST		none
1		Lus10007628	HH		none
1		Lus10007703	HH		none
1		Lus10007867	HC		none
1		Lus10007936	HH		none
1		Lus10008046	HH		none
1		Lus10008283	HH		none
1		Lus10008447	HH		none
1		Lus10008874	HH		none
1		Lus10009695	HC		none
1		Lus10010179	HH		none
1		Lus10010182	HH		none
1		Lus10010372	HH		none
1		Lus10010513	HH		none
1		Lus10011380	HH		none
1		Lus10011390	HC		none
1		Lus10011391	HC		none
1		Lus10011392	HH		none
1		Lus10012290	HC		none
1		Lus10012376	HD		none
1		Lus10012819	HH		none
1		Lus10013374	HH		none
1		Lus10013475	HH		none
1		Lus10013497	HH		none
1		Lus10013606	HH		none
1		Lus10013739	HC		none
1		Lus10014749	HC		none
1		Lus10015046	HH		none
1		Lus10015080	HC		none
1		Lus10015126	HH		none
1		Lus10015152	HC		none
1		Lus10015167	HH		none
1		Lus10015986	HC		none
1		Lus10016195	HH		none
1		Lus10016255	HC		none
1		Lus10016348	HC		none
1		Lus10016416	HH		none
1		Lus10016427	HH		none
1		Lus10016924	HH		none
1		Lus10017383	HH		none
1		Lus10017385	HH		none
1		Lus10017455	HC		none
1		Lus10017722	HH		none
1		Lus10017788	HH		none
1		Lus10017978	HH		none
1		Lus10018110	HC		none
1		Lus10018125	C2		none
1		Lus10018140	HH		none
1		Lus10018167	HH		none
1		Lus10018271	HC		none
1		Lus10018292	HH		none
1		Lus10018294	HC		none
1		Lus10018409	HC		none
1		Lus10019150	HH		none
1		Lus10019507	HH		none
1		Lus10019686	HH		none
1		Lus10019703	HH		none
1		Lus10020145	HH		none
1		Lus10020256	HH		none
1		Lus10020655	HH		none
1		Lus10020903	HC		none
1		Lus10021063	HC		none
1		Lus10021245	HH		none
1		Lus10021722	HH		none
1		Lus10021993	HC		none
1		Lus10022324	HC		none
1		Lus10022405	HC		none
1		Lus10022569	HC		none
1		Lus10022774	HC		none
1		Lus10022967	HH		none
1		Lus10023182	HC		none
1		Lus10023235	HH		none
1		Lus10023507	HH		none
1		Lus10023617	HH		none
1		Lus10024116	HC		none
1		Lus10024135	HC		none
1		Lus10024629	HH		none
1		Lus10024635	HH		none
1		Lus10024657	HH		none
1		Lus10024810	HH		none
1		Lus10025671	HH		none
1		Lus10025691	HH		none
1		Lus10025921	HC		none
1		Lus10026226	HH		none
1		Lus10026420	v		none
1		Lus10026941	HH		none
1		Lus10028009	HD		none
1		Lus10028827	HC		none
1		Lus10029292	HC		none
1		Lus10029351	HH		none
1		Lus10029456	HH		none
1		Lus10029693	HH		none
1		Lus10029886	HH		none
1		Lus10029940	HC		none
1		Lus10029993	HC		none
1		Lus10030117	HH		none
1		Lus10030120	HH		none
1		Lus10030248	HC		none
1		Lus10030375	HC		none
1		Lus10030464	HH		none
1		Lus10030597	HC		none
1		Lus10030599	HC		none
1		Lus10031202	HC		none
1		Lus10031275	HH		none
1		Lus10031491	HH		none
1		Lus10031515	HH		none
1		Lus10031549	HH		none
1		Lus10031780	HC		none
1		Lus10031993	HC		none
1		Lus10032265	HH		none
1		Lus10032270	HH		none
1		Lus10032290	HH		none
1		Lus10033682	HH		none
1		Lus10033697	HC		none
1		Lus10033860	HC		none
1		Lus10034030	HC		none
1		Lus10034049	HH		none
1		Lus10034165	HC		none
1		Lus10034367	HH		none
1		Lus10034407	HH		none
1		Lus10034644	HH		none
1		Lus10034793	HH		none
1		Lus10035163	HC		none
1		Lus10035335	HC		none
1		Lus10035820	HH		none
1		Lus10036034	HC		none
1		Lus10036404	HH		none
1		Lus10036757	HH		none
1		Lus10036764	HH		none
1		Lus10036934	HC		none
1		Lus10036937	HC		none
1		Lus10037053	HC		none
1		Lus10037170	HH		none
1		Lus10037391	HH		none
1		Lus10037412	HC		none
1		Lus10038180	HC		none
1		Lus10039202	HC		none
1		Lus10039634	HH		none
1		Lus10040151	HH		none
1		Lus10040389	HH		none
1		Lus10040613	HC		none
1		Lus10040617	HH		none
1		Lus10041300	HC		none
1		Lus10041970	HH		none
1		Lus10042156	C2		none
1		Lus10042171	HH		none
1		Lus10042443	HH		none
1		Lus10042532	HC		none
1		Lus10043027	HH		none
1		Lus10043353	HH		none
2	157	Lus10000487	HH		Transmembrane
2		Lus10000513	HH		Transmembrane
2		Lus10000710	HH		Transmembrane
2		Lus10000996	HC		Transmembrane
2		Lus10001568	HH		Transmembrane
2		Lus10002131	HH		Transmembrane
2		Lus10002194	HH		Transmembrane
2		Lus10002706	HH		Transmembrane
2		Lus10003400	HH		Transmembrane
2		Lus10003473	HC		Transmembrane
2		Lus10004572	HH		Transmembrane
2		Lus10004666	HC		Transmembrane
2		Lus10004977	HH		Transmembrane
2		Lus10005220	HC		Transmembrane
2		Lus10005275	HH		Transmembrane
2		Lus10005814	HH		Transmembrane
2		Lus10005815	HH		Transmembrane
2		Lus10005816	HH		Transmembrane
2		Lus10005817	HH		Transmembrane
2		Lus10005954	HH		Transmembrane
2		Lus10006493	HH		Transmembrane
2		Lus10006785	HH		Transmembrane
2		Lus10006786	HH		Transmembrane
2		Lus10006787	HH		Transmembrane
2		Lus10006788	HH		Transmembrane
2		Lus10007293	v		Transmembrane
2		Lus10007937	HH		Transmembrane
2		Lus10007967	HH		Transmembrane
2		Lus10008106	HH		Transmembrane
2		Lus10008235	HH		Transmembrane
2		Lus10008286	v		Transmembrane
2		Lus10008458	HH		Transmembrane
2		Lus10008797	HH		Transmembrane
2		Lus10008972	HH		Transmembrane
2		Lus10009326	HH		Transmembrane
2		Lus10009832	HH		Transmembrane
2		Lus10010392	HC		Transmembrane
2		Lus10010791	HC		Transmembrane
2		Lus10011027	HC		Transmembrane
2		Lus10011184	HC		Transmembrane
2		Lus10011416	HH		Transmembrane
2		Lus10011475	HH		Transmembrane
2		Lus10012033	HH		Transmembrane
2		Lus10012365	HH		Transmembrane
2		Lus10012745	HH		Transmembrane
2		Lus10012791	v		Transmembrane
2		Lus10012793	v		Transmembrane
2		Lus10012975	HH		Transmembrane
2		Lus10012987	HH		Transmembrane
2		Lus10013144	HH		Transmembrane
2		Lus10013210	HH		Transmembrane
2		Lus10013618	HH		Transmembrane
2		Lus10014526	HH		Transmembrane
2		Lus10015273	v		Transmembrane
2		Lus10015502	HH		Transmembrane
2		Lus10015506	HH		Transmembrane
2		Lus10015732	HC		Transmembrane
2		Lus10015837	HH		Transmembrane
2		Lus10015901	HH		Transmembrane
2		Lus10016040	HH		Transmembrane
2		Lus10016163	HH		Transmembrane
2		Lus10016303	HC		Transmembrane
2		Lus10016426	v		Transmembrane
2		Lus10016428	HH		Transmembrane
2		Lus10016451	v		Transmembrane
2		Lus10016541	HH		Transmembrane
2		Lus10016796	HC		Transmembrane
2		Lus10017197	v		Transmembrane
2		Lus10017253	HH		Transmembrane
2		Lus10017510	HH		Transmembrane
2		Lus10017750	HH		Transmembrane
2		Lus10017764	v		Transmembrane
2		Lus10018489	HC		Transmembrane
2		Lus10018589	HC		Transmembrane
2		Lus10018613	HH		Transmembrane
2		Lus10019685	HH		Transmembrane
2		Lus10019687	v		Transmembrane
2		Lus10019973	HH		Transmembrane
2		Lus10019979	HH		Transmembrane
2		Lus10020859	HH		Transmembrane
2		Lus10021113	v		Transmembrane
2		Lus10021197	HH		Transmembrane
2		Lus10021482	v		Transmembrane
2		Lus10021524	HH		Transmembrane
2		Lus10021628	HH		Transmembrane
2		Lus10021801	HH		Transmembrane
2		Lus10022223	HH		Transmembrane
2		Lus10022492	HC		Transmembrane
2		Lus10022567	HH		Transmembrane
2		Lus10022585	v		Transmembrane
2		Lus10022743	HH		Transmembrane
2		Lus10023055	HH		Transmembrane
2		Lus10023112	HH		Transmembrane
2		Lus10023477	HH		Transmembrane
2		Lus10024124	HH		Transmembrane
2		Lus10024405	HH		Transmembrane
2		Lus10024881	HH		Transmembrane
2		Lus10025145	HH		Transmembrane
2		Lus10025146	HH		Transmembrane
2		Lus10025162	HH		Transmembrane
2		Lus10025228	HH		Transmembrane
2		Lus10025338	HH		Transmembrane
2		Lus10025394	v		Transmembrane
2		Lus10025563	HH		Transmembrane
2		Lus10026501	v		Transmembrane
2		Lus10026648	HC		Transmembrane
2		Lus10027023	HH		Transmembrane
2		Lus10027736	HH		Transmembrane
2		Lus10027744	v		Transmembrane
2		Lus10027921	HC		Transmembrane
2		Lus10028249	v		Transmembrane
2		Lus10028406	HH		Transmembrane
2		Lus10028454	HH		Transmembrane
2		Lus10028773	HH		Transmembrane
2		Lus10029037	HH		Transmembrane
2		Lus10029178	HH		Transmembrane
2		Lus10029242	v		Transmembrane
2		Lus10029582	HH		Transmembrane
2		Lus10029794	HH		Transmembrane
2		Lus10030699	HC		Transmembrane
2		Lus10030728	HH		Transmembrane
2		Lus10030972	HH		Transmembrane
2		Lus10032161	HH		Transmembrane
2		Lus10032418	HH		Transmembrane
2		Lus10033053	v		Transmembrane
2		Lus10033075	HH		Transmembrane
2		Lus10033252	v		Transmembrane
2		Lus10033425	HH		Transmembrane
2		Lus10033472	HC		Transmembrane
2		Lus10033515	HH		Transmembrane
2		Lus10033985	v1, v2		Transmembrane
2		Lus10034153	HH		Transmembrane
2		Lus10034157	HH		Transmembrane
2		Lus10034587	HH		Transmembrane
2		Lus10035368	HH		Transmembrane
2		Lus10035549	v		Transmembrane
2		Lus10035677	HH		Transmembrane
2		Lus10035931	HH		Transmembrane
2		Lus10036378	HH		Transmembrane
2		Lus10036380	HH		Transmembrane
2		Lus10036569	HH		Transmembrane
2		Lus10037264	HH		Transmembrane
2		Lus10037410	v		Transmembrane
2		Lus10037906	v		Transmembrane
2		Lus10038632	v		Transmembrane
2		Lus10039821	HC		Transmembrane
2		Lus10039848	HH		Transmembrane
2		Lus10040240	v		Transmembrane
2		Lus10040359	HH		Transmembrane
2		Lus10040716	v		Transmembrane
2		Lus10040942	HH		Transmembrane
2		Lus10041079	HH		Transmembrane
2		Lus10041359	HH		Transmembrane
2		Lus10041859	HH		Transmembrane
2		Lus10042126	HH		Transmembrane
2		Lus10042277	HH		Transmembrane
2		Lus10043426	HH		Transmembrane
3.1	29	Lus10000899	HC		Coiled coil region
3.1		Lus10001131	HC		Coiled coil region
3.1		Lus10004557	HC		Coiled coil region
3.1		Lus10005127	HH		Coiled coil region
3.1		Lus10013027	HC		Coiled coil region
3.1		Lus10013821	HG		Coiled coil region
3.1		Lus10014118	HC		Coiled coil region
3.1		Lus10017865	HH		Coiled coil region
3.1		Lus10018609	HC		Coiled coil region
3.1		Lus10018817	HH		Coiled coil region
3.1		Lus10019790	HC		Coiled coil region
3.1		Lus10021403	HC		Coiled coil region
3.1		Lus10021953	HC		Coiled coil region
3.1		Lus10021954	HC		Coiled coil region
3.1		Lus10023671	HH		Coiled coil region
3.1		Lus10024057	HC		Coiled coil region
3.1		Lus10029136	HC		Coiled coil region
3.1		Lus10030891	HC		Coiled coil region
3.1		Lus10031422	HH		Coiled coil region
3.1		Lus10032119	HC		Coiled coil region
3.1		Lus10034667	HH		Coiled coil region
3.1		Lus10037928	HC		Coiled coil region
3.1		Lus10038656	HC		Coiled coil region
3.1		Lus10039845	HC		Coiled coil region
3.1		Lus10041244	HC		Coiled coil region
3.1		Lus10041245	HC		Coiled coil region
3.1		Lus10041246	HC		Coiled coil region
3.1		Lus10041689	HC		Coiled coil region
3.1		Lus10042890	HC		Coiled coil region
3.2	1	Lus10012062	HC		Coiled coil region, Transmembrane
4.1	4	Lus10002316	HH		Signal peptide
4.1		Lus10005617	HH		Signal peptide
4.1		Lus10021842	HH		Signal peptide
4.1		Lus10034551	HH		Signal peptide
4.2	9	Lus10000333	HH		Signal peptide, Transmembrane
4.2		Lus10004460	HH		Signal peptide, Transmembrane
4.2		Lus10009438	HH		Signal peptide, Transmembrane
4.2		Lus10009511	HH		Signal peptide, Transmembrane
4.2		Lus10011702	HH		Signal peptide, Transmembrane
4.2		Lus10032382	HH		Signal peptide, Transmembrane
4.2		Lus10034953	HH		Signal peptide, Transmembrane
4.2		Lus10036466	HH		Signal peptide, Transmembrane
4.2		Lus10041134	HH		Signal peptide, Transmembrane
5	1	Lus10002639	HH		AAA
6.1	6	Lus10005754	HC		ANK
6.1		Lus10009035	HC		ANK
6.1		Lus10009674	HC		ANK
6.1		Lus10015503	HC		ANK
6.1		Lus10019974	HC		ANK
6.1		Lus10027441	HC		ANK
6.2	2	Lus10016561	HC		ANK, Coiled coil region
6.2		Lus10040829	HC		ANK, Coiled coil region
7	4	Lus10006651	HC		BRAP2, ZnF_UBP, Coiled coil region
7		Lus10021683	HH		BRAP2, ZnF_UBP, Coiled coil region
7		Lus10035023	HH		BRAP2, ZnF_UBP, Coiled coil region
7		Lus10038095	HC		BRAP2, ZnF_UBP, Coiled coil region
8.1	2	Lus10022895	HC, v		BRCT
8.1		Lus10034088	HC		BRCT
8.2	1	Lus10036151	HC		BRCT, PHD
9.1	2	Lus10031618	HH		Clathrin, Pep3_Vps18, Coiled coil region
9.1		Lus10033725	HH		Clathrin, Pep3_Vps18, Coiled coil region
9.2	1	Lus10012332	HH		Clathrin, VPS11_C
9.3	1	Lus10006378	HH		Clathrin, VPS11_C, Coiled coil region
9.4	1	Lus10030199	HH		Clathrin, Vps8, WD40
10	1	Lus10026380	HH		CBM_2, 6PF2K, PGAM
11.1	1	Lus10020487	ST		CTLH, CRA
11.2	1	Lus10019837	ST		CTLH, LisH
12	1	Lus10014366	HC		CTP_transf_like
13	2	Lus10031152	HH		CUE, Transmembrane
13		Lus10031728	HH		CUE, Transmembrane
14.1	1	Lus10008225	C2		Cellulose_synt
14.2	7	Lus10002939	C2		Cellulose_synt, Glyco_trans_2_3
14.2		Lus10003526	C2		Cellulose_synt, Glyco_trans_2_3
14.2		Lus10006161	C2		Cellulose_synt, Glyco_trans_2_3
14.2		Lus10022449	C2		Cellulose_synt, Glyco_trans_2_3
14.2		Lus10028597	C2		Cellulose_synt, Glyco_trans_2_3
14.2		Lus10039607	C2		Cellulose_synt, Glyco_trans_2_3
14.2		Lus10041063	C2		Cellulose_synt, Glyco_trans_2_3
14.3	1	Lus10002940	C2		Cellulose_synt, Glyco_trans_2_3, Glycos_transf_2
14.4	4	Lus10007296	C2		Cellulose_synt, Glyco_trans_2_3, Transmembrane
14.4		Lus10007538	C2		Cellulose_synt, Glyco_trans_2_3, Transmembrane
14.4		Lus10012198	C2		Cellulose_synt, Glyco_trans_2_3, Transmembrane
14.4		Lus10029245	C2		Cellulose_synt, Glyco_trans_2_3, Transmembrane
14.5	1	Lus10003525	C2		Cellulose_synt, H15
15.1	2	Lus10011211	HC		DEXDc, HELICc
15.1		Lus10041008	HC		DEXDc, HELICc
15.2	1	Lus10018465	HC		DEXDc, HELICc, Coiled coil region
15.3	1	Lus10023162	HC		DEXDc, HELICc, HA2, OB_NTP_bind, IBR, Coiled coil region
15.4	2	Lus10039001	HC		DEXDc, HELICc, HIRAN
15.4		Lus10043365	HC		DEXDc, HELICc, HIRAN
15.5	1	Lus10041156	HG		DEXDc, HELICc, HIRAN, Coiled coil region
15.6	1	Lus10012867	HC		DEXDc, HELICc, HMA, Coiled coil region, PHD
15.7	1	Lus10030044	HC		DEXDc, HELICc, SNF2_N
15.8	1	Lus10013452	HC		DEXDc, HELICc, WD40, Katanin_con80
15.9	1	Lus10030512	HC		HELICc
16.1	2	Lus10000023	HH		DUF1117
16.1		Lus10040783	HH		DUF1117
16.2	2	Lus10009529	HC		DUF1232
16.2		Lus10020349	HC		DUF1232
16.3	14	Lus10002282	v		DUF3675
16.3		Lus10004058	v		DUF3675
16.3		Lus10010011	v		DUF3675
16.3		Lus10012826	v		DUF3675
16.3		Lus10019102	v		DUF3675
16.3		Lus10021670	v		DUF3675
16.3		Lus10025031	v		DUF3675
16.3		Lus10030472	v		DUF3675
16.3		Lus10034454	v		DUF3675
16.3		Lus10034640	v		DUF3675
16.3		Lus10035010	v		DUF3675
16.3		Lus10035271	v		DUF3675
16.3		Lus10036754	v		DUF3675
16.3		Lus10037172	v		DUF3675
16.4	1	Lus10013491	v		DUF3675, Maf1
16.5	1	Lus10002487	HC		DUF4792, DUF4793, Transmembrane
16.6	1	Lus10004813	HC		DUF4793
17	1	Lus10043428	HH		EDR1, Pkinase_Tyr, Pkinase
18	1	Lus10037162	HH		Endosulfine, Methyltransf_11, DnaJ
19	1	Lus10041907	HH		Exo_endo_phos, Transmembrane
20	1	Lus10037490	HH		FAA_hydrolase, Transmembrane
21	1	Lus10034832	v		F-box-like, Transmembrane
22	1	Lus10019839	v		FPP, Transmembrane
23.1	1	Lus10000533	HC		GIDE, Transmembrane
23.2	1	Lus10008163	HC		GIDE, Signal peptide
23.2		Lus10027994	HC		GIDE, Signal peptide
24	1	Lus10041603	HC		IBN_N
25.1	2	Lus10000412	HC		IBR
25.1		Lus10026104	HC		IBR
25.2	6	Lus10011309	HC		IBR, Coiled coil region
25.2		Lus10025566	HC		IBR, Coiled coil region
25.2		Lus10027027	HC		IBR, Coiled coil region
25.2		Lus10036127	HC		IBR, Coiled coil region
25.2		Lus10040508	HC		IBR, Coiled coil region
25.2		Lus10042348	HC		IBR, Coiled coil region
25.3	3	Lus10036128	HC		IBR, RVT_3
25.3		Lus10036202	HC1, HC2		IBR, RVT_3
25.3		Lus10038341	HC1, HC2		IBR, RVT_3
25.4	2	Lus10018293	HC		RVT_3
25.4		Lus10040616	HC		RVT_3
25.5	2	Lus10004568	HC		IBR, RWD
25.5		Lus10004569	HC, C2		IBR, RWD
25.6	1	Lus10000908	HC		IBR, RWD, Coiled coil region
25.7	2	Lus10009773	HH		RWD
25.7		Lus10024759	HH		RWD
25.8	3	Lus10013371	HC		IBR, ZnF-C2H2
25.8		Lus10020229	HC		IBR, ZnF-C2H2, ZnF-RBZ
25.8		Lus10026856	HC		IBR, ZnF-RBZ, Coiled coild region
26.1	6	Lus10002051	C2		JmjC
26.1		Lus10002391	C2		JmjC
26.1		Lus10006741	C2		JmjC
26.1		Lus10015260	C2		JmjC
26.1		Lus10020033	C2		JmjC
26.1		Lus10027890	C2		JmjC
26.2	2	Lus10017092	C2		JmjC, WRC
26.2		Lus10037812	C2		JmjC, WRC
26.3	1	Lus10020084	C2		JmjC, WRC, Coiled coil region
27	2	Lus10017969	HC		KISc, Coiled coil region
27		Lus10028790	HC		KISc, Coiled coil region
28.1	1	Lus10015722	HC		LON_substr_bdg
28.2	1	Lus10019075	HC		LON_substr_bdg, Transmembrane
29	1	Lus10001421	HH		Mpv17_PMP22
30.1	3	Lus10014823	HH		PA, Transmembrane
30.1		Lus10028443	HH		PA, Transmembrane
30.1		Lus10041896	HH		PA, Transmembrane
30.2	2	Lus10006074	HH		PA, Transmembrane, Signal peptide
30.2		Lus10016936	HH		PA, Transmembrane, Signal peptide
31	3	Lus10006832	HC		Pex2_Pex12
31		Lus10020007	HC		Pex2_Pex12
31		Lus10037580	HC		Pex2_Pex12
32.1	2	Lus10015213	HC		PHD
32.1		Lus10031468	HC		PHD
32.2	1	Lus10032402	HC		PHD, Coiled coil region
32.3	1	Lus10023068	HC		PHD, EloA-BP1
32.4	1	Lus10035553	HH, v		PHD, Jas, Pectinesterase
33.1	2	Lus10018126	C2		RRM
33.1		Lus10036140	C2		RRM
33.2	1	Lus10036138	C2		RRM, Coiled coil region
33.3	1	Lus10041301	v		RRM,Methyltransf_31, tRNA_U5-meth_tr, ZnF_C3H1, Transmembrane
34.1	1	Lus10038731	HC1, HC2, v		SAD_SRA
34.2	1	Lus10039127	HC1, HC2, v		SRA
35	2	Lus10016817	HC		SPRY
35		Lus10035857	HC		SPRY
36.1	2	Lus10032471	HC		Tmemb_185A
36.1		Lus10042969	HC		Tmemb_185A
36.2	2	Lus10021710	HC		Tmemb_185A, Transmembrane
36.2		Lus10035057	HC		Tmemb_185A, Transmembrane
37.1	4	Lus10003485	HH		VWA
37.1		Lus10006463	HC		VWA
37.1		Lus10011405	HC		VWA
37.1		Lus10022294	HC		VWA
37.2	2	Lus10023527	HH		VWA, Vwaint
37.2		Lus10041321	HH		VWA, Vwaint
37.3	3	Lus10016102	HH		VWA, Vwaint, Coiled coil region
37.3		Lus10021458	HH1, HH2		VWA, Vwaint, Coiled coil region
37.3		Lus10040413	HH		VWA, Vwaint, Coiled coil region
38.1	1	Lus10019018	HH		WAK_assoc, Transmembrane
38.2	1	Lus10012628	HH		GUB_WAK_bind , WAK_assoc, Transmembrane, Signal peptide
39.1	1	Lus10028560	HC		WD40
39.2	2	Lus10029990	HC		WD40, Coiled coil region
39.2		Lus10035332	HC		WD40, Coiled coil region
39.3	1	Lus10002679	HH		WD40, Vps8
40.1	1	Lus10042190	HH		zf-CHY
40.2	1	Lus10042188	HH		zinc_ribbon_6
40.3	3	Lus10012811	HH		zinc_ribbon_6, zf-CHY
40.3		Lus10023914	HH		zinc_ribbon_6, zf-CHY
40.3		Lus10033969	HH		zinc_ribbon_6, zf-CHY
40.4	3	Lus10005111	HH		zinc_ribbon_6, zf-CHY, Hemerythrin
40.4		Lus10008628	HH		zinc_ribbon_6, zf-CHY, Hemerythrin
40.4		Lus10034346	HH		zinc_ribbon_6, zf-CHY, Hemerythrin
41.1	8	Lus10002637	HH		zinc_ribbon_9
41.1		Lus10003698	HH		zinc_ribbon_9
41.1		Lus10013235	HH		zinc_ribbon_9
41.1		Lus10013397	HH		zinc_ribbon_9
41.1		Lus10025612	HH		zinc_ribbon_9
41.1		Lus10028063	HH		zinc_ribbon_9
41.1		Lus10030755	HH		zinc_ribbon_9
41.1		Lus10040278	HH		zinc_ribbon_9
41.2	2	Lus10004712	HH		zinc_ribbon_9, DUF1117
41.2		Lus10024372	HH		zinc_ribbon_9, DUF1117
41.3	1	Lus10020258	HH		zinc_ribbon_9, MlaE
42	3	Lus10004521	HC		Znf_C2H2
42		Lus10010069	HC		ZnF_C2H2
42		Lus10038048	HC		Znf_C2H2
43	2	Lus10009810	HC		ZnF-C3H1
43		Lus10040914	HC		ZnF-C3H1
44	2	Lus10025071	v		ZnF_NFX
44		Lus10034470	v		ZnF_NFX
45.1	1	Lus10025930	HC1, HC2		ZnF_ZZ
45.2	1	Lus10038169	HC1, HC2		ZnF_ZZ, BTB, NPH3, Coiled coil region
a See Figure 1A for the definition of each RING type.
b The domain architecture of each RING finger protein was predicted by on-line SAMRT program (http://smart.embl-heidelberg.de/smart/batch.pl).
c The additional domains found in each RING finger protein was determined by on-line SAMRT program.
