# Supplementary material for: Genome-wide identification of RING finger genes in flax (Linum usitatissimum) and analyses of their evolution
Source: PeerJ. 2021 Nov 15;9:e12491. doi: 10.7717/peerj.12491 (PMC8601054; doi:10.7717/peerj.12491)
Supplement: Supplemental Information 14 [file peerj-09-12491-s014.xlsx]

## Sheet: Sheet1
Table S3. Duplication events in flax RING finger genes.
NO.	Duplication type	Seq_1	Seq_2	Ka	Ks	Ka/Ks	Selection pressure	MYA
1	Segmental duplication	Lus10000023	Lus10004712	0.423568	NaN	NaN	NaN	#VALUE!
2	Segmental duplication	Lus10000023	Lus10040278	0.227762	NaN	NaN	NaN	#VALUE!
3	Segmental duplication	Lus10000333	Lus10015167	0.217016	1.16912	0.185624	Negative selection	38.9706
4	Segmental duplication	Lus10000487	Lus10030972	0.36731	1.64433	0.22338	Negative selection	54.8109
5	Segmental duplication	Lus10000710	Lus10024881	0.0412259	0.121356	0.33971	Negative selection	4.04521
6	Segmental duplication	Lus10000885	Lus10008458	0.0650815	0.166066	0.391902	Negative selection	5.53552
7	Segmental duplication	Lus10001654	Lus10021628	0.0127488	0.123801	0.102979	Negative selection	4.12669
8	Segmental duplication	Lus10002369	Lus10042126	0.0106423	0.208484	0.0510459	Negative selection	6.94946
9	Segmental duplication	Lus10002584	Lus10018409	0.00570752	0.117364	0.0486309	Negative selection	3.91213
10	Segmental duplication	Lus10002761	Lus10016348	0.0190325	0.175183	0.108643	Negative selection	5.83945
11	Segmental duplication	Lus10002939	Lus10041063	0.0385105	0.656585	0.0586527	Negative selection	21.8862
12	Segmental duplication	Lus10003261	Lus10021993	0.47161	0.716154	0.658531	Negative selection	23.8718
13	Segmental duplication	Lus10003473	Lus10015732	0.040203	0.121775	0.330141	Negative selection	4.05917
14	Segmental duplication	Lus10003485	Lus10039634	0.0517684	0.182661	0.283413	Negative selection	6.08869
15	Segmental duplication	Lus10003525	Lus10002939	0.115368	0.248867	0.463574	Negative selection	8.29558
16	Segmental duplication	Lus10003617	Lus10008235	0.173423	0.204111	0.849651	Negative selection	6.80371
17	Segmental duplication	Lus10004001	Lus10030248	0.00812374	0.133742	0.0607421	Negative selection	4.45805
18	Segmental duplication	Lus10004058	Lus10002282	0.0722922	0.141853	0.509628	Negative selection	4.72843
19	Segmental duplication	Lus10004162	Lus10021063	0.0104395	0.122369	0.0853113	Negative selection	4.07898
20	Segmental duplication	Lus10004246	Lus10042156	0.0105899	0.189731	0.0558152	Negative selection	6.32436
21	Segmental duplication	Lus10004419	Lus10034030	0.0248026	0.071866	0.345124	Negative selection	2.39553
22	Segmental duplication	Lus10004557	Lus10000899	0.0136106	0.0787472	0.172839	Negative selection	2.62491
23	Segmental duplication	Lus10004568	Lus10000908	0.375536	0.864686	0.434303	Negative selection	28.8229
24	Segmental duplication	Lus10004572	Lus10030972	0.359172	1.6143	0.222494	Negative selection	53.8099
25	Segmental duplication	Lus10004977	Lus10001568	0.0208375	0.175195	0.118939	Negative selection	5.83982
26	Segmental duplication	Lus10005084	Lus10034367	0.00855472	0.0599945	0.142592	Negative selection	1.99982
27	Segmental duplication	Lus10005111	Lus10034346	0.00578229	0.0532057	0.108678	Negative selection	1.77352
28	Segmental duplication	Lus10005220	Lus10030699	0.0239327	0.158561	0.150937	Negative selection	5.28537
29	Segmental duplication	Lus10005389	Lus10024124	0.0208347	0.169029	0.123261	Negative selection	5.63429
30	Segmental duplication	Lus10005954	Lus10029456	0.00406781	0.350059	0.0116203	Negative selection	11.6686
31	Segmental duplication	Lus10006074	Lus10009438	0.196253	0.530223	0.370132	Negative selection	17.6741
32	Segmental duplication	Lus10006253	Lus10036937	0.0169021	0.118999	0.142036	Negative selection	3.96663
33	Segmental duplication	Lus10006378	Lus10012332	0.00637103	0.0817618	0.0779217	Negative selection	2.72539
34	Segmental duplication	Lus10006447	Lus10036934	0.0903603	0.926691	0.0975086	Negative selection	30.8897
35	Segmental duplication	Lus10006447	Lus10037053	0.0796183	0.897723	0.0886892	Negative selection	29.9241
36	Segmental duplication	Lus10006448	Lus10006253	0.137521	0.989975	0.138914	Negative selection	32.9992
37	Segmental duplication	Lus10006448	Lus10036937	0.140796	0.864679	0.162831	Negative selection	28.8226
38	Segmental duplication	Lus10006493	Lus10037490	0.0415811	0.139126	0.298874	Negative selection	4.63753
39	Segmental duplication	Lus10006558	Lus10003261	0.0218109	0.0656156	0.332404	Negative selection	2.18719
40	Segmental duplication	Lus10006558	Lus10021993	0.407898	0.65984	0.618177	Negative selection	21.9947
41	Segmental duplication	Lus10006651	Lus10038095	0.0136213	0.0947683	0.143732	Negative selection	3.15894
42	Segmental duplication	Lus10006741	Lus10020084	0.0278263	0.0903063	0.308132	Negative selection	3.01021
43	Segmental duplication	Lus10006785	Lus10005817	0.180775	0.353666	0.511145	Negative selection	11.7889
44	Segmental duplication	Lus10006787	Lus10005816	0.292946	0.751267	0.389935	Negative selection	25.0422
45	Segmental duplication	Lus10006788	Lus10033515	0.256013	1.19185	0.214803	Negative selection	39.7283
46	Segmental duplication	Lus10006832	Lus10037580	0.0165096	0.139565	0.118293	Negative selection	4.65216
47	Segmental duplication	Lus10007293	Lus10025394	0.47038	0.833441	0.564384	Negative selection	27.7814
48	Segmental duplication	Lus10007293	Lus10029242	0.0287245	0.0973813	0.29497	Negative selection	3.24604
49	Segmental duplication	Lus10007296	Lus10029245	0.00574377	0.1888	0.0304226	Negative selection	6.29332
50	Segmental duplication	Lus10008447	Lus10013374	0.0193863	0.111417	0.173998	Negative selection	3.71389
51	Segmental duplication	Lus10008628	Lus10042188	0.0811429	0.265499	0.305625	Negative selection	8.84996
52	Segmental duplication	Lus10008797	Lus10022223	0.0362412	0.100729	0.359788	Negative selection	3.35764
53	Segmental duplication	Lus10009438	Lus10014823	0.274647	1.19171	0.230464	Negative selection	39.7238
54	Segmental duplication	Lus10009511	Lus10011702	0.0334162	0.0657425	0.508289	Negative selection	2.19142
55	Segmental duplication	Lus10009674	Lus10009035	0.0332284	0.0739215	0.449509	Negative selection	2.46405
56	Segmental duplication	Lus10009773	Lus10024759	0.0657444	0.103229	0.636881	Negative selection	3.44096
57	Segmental duplication	Lus10010069	Lus10004521	0.0463388	0.164363	0.281929	Negative selection	5.47878
58	Segmental duplication	Lus10010069	Lus10038048	0.180586	0.833683	0.216613	Negative selection	27.7894
59	Segmental duplication	Lus10010791	Lus10016303	0.00584608	0.112421	0.0520016	Negative selection	3.74737
60	Segmental duplication	Lus10011184	Lus10018489	0.0165549	0.160181	0.103352	Negative selection	5.33935
61	Segmental duplication	Lus10011184	Lus10039821	0.570529	2.28679	0.24949	Negative selection	76.2262
62	Segmental duplication	Lus10011211	Lus10018465	0.0107811	0.0755884	0.142629	Negative selection	2.51961
63	Segmental duplication	Lus10011309	Lus10040508	0.039282	0.0541401	0.725562	Negative selection	1.80467
64	Segmental duplication	Lus10011390	Lus10006447	0.00906766	0.131991	0.0686992	Negative selection	4.39969
65	Segmental duplication	Lus10011390	Lus10036934	0.0913806	0.876473	0.104259	Negative selection	29.2158
66	Segmental duplication	Lus10011390	Lus10037053	0.111471	0.929295	0.119952	Negative selection	30.9765
67	Segmental duplication	Lus10011391	Lus10006253	0.151074	0.913522	0.165376	Negative selection	30.4507
68	Segmental duplication	Lus10011391	Lus10006448	0.0110026	0.108933	0.101004	Negative selection	3.6311
69	Segmental duplication	Lus10011391	Lus10036937	0.154774	0.852956	0.181457	Negative selection	28.4319
70	Segmental duplication	Lus10011392	Lus10006449	0.486758	0.831443	0.585437	Negative selection	27.7148
71	Segmental duplication	Lus10011405	Lus10006463	0.0457753	0.206801	0.22135	Negative selection	6.89336
72	Segmental duplication	Lus10011475	Lus10023112	0.0120558	0.131306	0.091815	Negative selection	4.37685
73	Segmental duplication	Lus10012062	Lus10014366	0.357221	1.1802	0.302679	Negative selection	39.3399
74	Segmental duplication	Lus10012062	Lus10027921	0.0110245	0.159703	0.0690314	Negative selection	5.32344
75	Segmental duplication	Lus10012198	Lus10007538	0.00805512	0.15831	0.0508819	Negative selection	5.277
76	Segmental duplication	Lus10012793	Lus10033985	0.0343149	0.113728	0.301727	Negative selection	3.79093
77	Segmental duplication	Lus10012811	Lus10033969	0.0195977	0.0869771	0.22532	Negative selection	2.89924
78	Segmental duplication	Lus10012819	Lus10036757	0.365055	1.03594	0.35239	Negative selection	34.5313
79	Segmental duplication	Lus10012819	Lus10037170	0.356505	1.2095	0.294753	Negative selection	40.3168
80	Segmental duplication	Lus10012826	Lus10036754	0.0947872	0.838729	0.113013	Negative selection	27.9576
81	Segmental duplication	Lus10012826	Lus10037172	0.113602	0.850954	0.133499	Negative selection	28.3651
82	Segmental duplication	Lus10012975	Lus10034953	0.0480164	0.230072	0.208702	Negative selection	7.66906
83	Segmental duplication	Lus10013144	Lus10008106	0.0216188	0.128052	0.168828	Negative selection	4.2684
84	Segmental duplication	Lus10013210	Lus10016040	0.19686	0.787014	0.250135	Negative selection	26.2338
85	Segmental duplication	Lus10013374	Lus10021245	0.354793	1.79244	0.197938	Negative selection	59.748
86	Segmental duplication	Lus10013475	Lus10007936	0.0157735	0.14802	0.106563	Negative selection	4.93399
87	Segmental duplication	Lus10013497	Lus10007967	0.0198281	0.234507	0.0845519	Negative selection	7.81692
88	Segmental duplication	Lus10013739	Lus10039202	0.00992453	0.241851	0.0410357	Negative selection	8.0617
89	Segmental duplication	Lus10014749	Lus10033860	0.0141204	0.121044	0.116656	Negative selection	4.03479
90	Segmental duplication	Lus10014823	Lus10016936	0.0440581	0.0870622	0.506053	Negative selection	2.90207
91	Segmental duplication	Lus10015046	Lus10003992	0.053363	0.172331	0.309654	Negative selection	5.74438
92	Segmental duplication	Lus10015080	Lus10023182	0.0139054	0.108052	0.128692	Negative selection	3.60172
93	Segmental duplication	Lus10015080	Lus10041300	0.299857	1.59324	0.188206	Negative selection	53.1079
94	Segmental duplication	Lus10015273	Lus10007293	0.307652	0.705532	0.436056	Negative selection	23.5177
95	Segmental duplication	Lus10015273	Lus10025394	0.183784	0.455217	0.403728	Negative selection	15.1739
96	Segmental duplication	Lus10015273	Lus10029242	0.330953	0.638525	0.518308	Negative selection	21.2842
97	Segmental duplication	Lus10015986	Lus10012290	0.0038635	0.130218	0.0296695	Negative selection	4.3406
98	Segmental duplication	Lus10016040	Lus10025162	0.0313498	0.115464	0.271511	Negative selection	3.84881
99	Segmental duplication	Lus10016102	Lus10021458	0.0306437	0.117679	0.260402	Negative selection	3.92262
100	Segmental duplication	Lus10016102	Lus10041321	0.231799	1.3102	0.176919	Negative selection	43.6733
101	Segmental duplication	Lus10016195	Lus10013606	0.197258	0.817084	0.241417	Negative selection	27.2361
102	Segmental duplication	Lus10016195	Lus10021245	0.189463	0.73266	0.258597	Negative selection	24.422
103	Segmental duplication	Lus10016195	Lus10029351	0.022105	0.0773821	0.28566	Negative selection	2.5794
104	Segmental duplication	Lus10016255	Lus10004162	0.159821	0.85174	0.18764	Negative selection	28.3913
105	Segmental duplication	Lus10016255	Lus10021063	0.148013	0.736868	0.200868	Negative selection	24.5623
106	Segmental duplication	Lus10016255	Lus10029292	0.00906736	0.160048	0.0566541	Negative selection	5.33493
107	Segmental duplication	Lus10016451	Lus10017197	0.453385	2.20186	0.20591	Negative selection	73.3955
108	Segmental duplication	Lus10016451	Lus10021113	0.462824	NaN	NaN	NaN	#VALUE!
109	Segmental duplication	Lus10016451	Lus10040240	0.536695	NaN	NaN	NaN	#VALUE!
110	Segmental duplication	Lus10016451	Lus10040716	0.00685327	0.0761754	0.0899671	Negative selection	2.53918
111	Segmental duplication	Lus10016561	Lus10040829	0.0243668	0.139908	0.174164	Negative selection	4.66359
112	Segmental duplication	Lus10016796	Lus10022492	0.0196218	0.0902375	0.217446	Negative selection	3.00792
113	Segmental duplication	Lus10016817	Lus10035857	0.00865977	0.0443717	0.195164	Negative selection	1.47906
114	Segmental duplication	Lus10017197	Lus10021113	0.0403658	0.151817	0.265886	Negative selection	5.06055
115	Segmental duplication	Lus10017253	Lus10005617	0.0262691	0.343476	0.0764802	Negative selection	11.4492
116	Segmental duplication	Lus10017383	Lus10010179	0	0.106779	0	Negative selection	3.5593
117	Segmental duplication	Lus10017385	Lus10010182	0.0251873	0.141819	0.177601	Negative selection	4.72731
118	Segmental duplication	Lus10017969	Lus10028790	0.0723078	0.563206	0.128386	Negative selection	18.7735
119	Segmental duplication	Lus10018110	Lus10022405	0	0.0928541	0	Negative selection	3.09514
120	Segmental duplication	Lus10018140	Lus10025691	0.0438226	0.194369	0.225461	Negative selection	6.47897
121	Segmental duplication	Lus10018167	Lus10025671	0.037907	0.13764	0.275407	Negative selection	4.588
122	Segmental duplication	Lus10018292	Lus10040617	0.0554144	0.128888	0.429943	Negative selection	4.29626
123	Segmental duplication	Lus10018293	Lus10038341	0.179911	0.699079	0.257355	Negative selection	23.3026
124	Segmental duplication	Lus10018293	Lus10040616	0.0408916	0.0694172	0.589071	Negative selection	2.31391
125	Segmental duplication	Lus10018294	Lus10040613	0.028673	0.140419	0.204196	Negative selection	4.68064
126	Segmental duplication	Lus10018589	Lus10018489	0.544657	1.83138	0.297402	Negative selection	61.0461
127	Segmental duplication	Lus10018589	Lus10033697	0.343082	1.29617	0.264688	Negative selection	43.2057
128	Segmental duplication	Lus10018817	Lus10005127	0.028296	0.06353	0.445395	Negative selection	2.11767
129	Segmental duplication	Lus10019018	Lus10003400	0.0430283	0.228464	0.188337	Negative selection	7.61546
130	Segmental duplication	Lus10019018	Lus10032382	0.615773	1.2909	0.477011	Negative selection	43.03
131	Segmental duplication	Lus10019075	Lus10015722	0.0717337	0.161878	0.443134	Negative selection	5.39594
132	Segmental duplication	Lus10019102	Lus10034454	0.0167647	0.0885677	0.189287	Negative selection	2.95226
133	Segmental duplication	Lus10019150	Lus10034407	0.0841217	0.119061	0.706541	Negative selection	3.96871
134	Segmental duplication	Lus10019686	Lus10016428	0.479746	1.11426	0.430553	Negative selection	37.1419
135	Segmental duplication	Lus10019687	Lus10016426	0.0040872	0.07402	0.0552176	Negative selection	2.46733
136	Segmental duplication	Lus10019703	Lus10016416	0.0321765	0.121477	0.264877	Negative selection	4.04923
137	Segmental duplication	Lus10019790	Lus10014118	0.0153739	0.0652585	0.235584	Negative selection	2.17528
138	Segmental duplication	Lus10019973	Lus10015502	0.0296368	0.151636	0.195447	Negative selection	5.05454
139	Segmental duplication	Lus10019974	Lus10015503	0.017035	0.131378	0.129664	Negative selection	4.37926
140	Segmental duplication	Lus10019979	Lus10015506	0.0201354	0.0811602	0.248095	Negative selection	2.70534
141	Segmental duplication	Lus10020256	Lus10002639	0.0154091	0.099477	0.154902	Negative selection	3.3159
142	Segmental duplication	Lus10020349	Lus10009529	0.00239808	0.138605	0.0173016	Negative selection	4.62015
143	Segmental duplication	Lus10020655	Lus10029886	0.0120518	0.094815	0.127108	Negative selection	3.1605
144	Segmental duplication	Lus10020859	Lus10033515	0.0395758	0.176659	0.224024	Negative selection	5.88862
145	Segmental duplication	Lus10020903	Lus10033472	0.0745427	0.161943	0.4603	Negative selection	5.39812
146	Segmental duplication	Lus10021197	Lus10024881	0.632904	1.41484	0.447332	Negative selection	47.1614
147	Segmental duplication	Lus10021245	Lus10013606	0.0244894	0.0742585	0.329786	Negative selection	2.47528
148	Segmental duplication	Lus10021458	Lus10041321	0.246091	1.19675	0.205634	Negative selection	39.8916
149	Segmental duplication	Lus10021482	Lus10026501	0.399524	2.66651	0.14983	Negative selection	88.8837
150	Segmental duplication	Lus10021482	Lus10037410	0.211285	0.697168	0.303062	Negative selection	23.2389
151	Segmental duplication	Lus10021482	Lus10041301	0.22142	0.741526	0.2986	Negative selection	24.7175
152	Segmental duplication	Lus10021670	Lus10019102	0.138379	0.594191	0.232886	Negative selection	19.8064
153	Segmental duplication	Lus10021670	Lus10034454	0.124485	0.59795	0.208186	Negative selection	19.9317
154	Segmental duplication	Lus10021722	Lus10007967	0.357996	1.24358	0.287875	Negative selection	41.4527
155	Segmental duplication	Lus10021722	Lus10013497	0.312888	0.907282	0.344863	Negative selection	30.2427
156	Segmental duplication	Lus10021842	Lus10017253	0.202766	1.46253	0.13864	Negative selection	48.7511
157	Segmental duplication	Lus10022585	Lus10021482	0.0168968	0.0474936	0.355771	Negative selection	1.58312
158	Segmental duplication	Lus10022585	Lus10037410	0.208437	0.683928	0.304765	Negative selection	22.7976
159	Segmental duplication	Lus10022585	Lus10041301	0.22341	0.699	0.319614	Negative selection	23.3
160	Segmental duplication	Lus10022743	Lus10025146	0.310482	1.09975	0.28232	Negative selection	36.6584
161	Segmental duplication	Lus10022967	Lus10001611	0.0717933	0.319597	0.224637	Negative selection	10.6532
162	Segmental duplication	Lus10023055	Lus10032418	0.0353864	0.106373	0.332664	Negative selection	3.54575
163	Segmental duplication	Lus10023068	Lus10032402	0.0369949	0.112589	0.328583	Negative selection	3.75298
164	Segmental duplication	Lus10023235	Lus10008874	0.0322008	0.123528	0.260677	Negative selection	4.11759
165	Segmental duplication	Lus10023477	Lus10040359	0.0309614	0.111503	0.277673	Negative selection	3.71678
166	Segmental duplication	Lus10023507	Lus10040389	0.0177937	0.0640314	0.27789	Negative selection	2.13438
167	Segmental duplication	Lus10023527	Lus10040413	0.0202044	0.205667	0.0982381	Negative selection	6.85557
168	Segmental duplication	Lus10024405	Lus10025338	0.0197293	0.116782	0.168941	Negative selection	3.89274
169	Segmental duplication	Lus10024657	Lus10017510	0.203641	0.681487	0.298818	Negative selection	22.7162
170	Segmental duplication	Lus10025031	Lus10010011	0.0384638	0.107627	0.357381	Negative selection	3.58757
171	Segmental duplication	Lus10025071	Lus10034470	0.0218036	0.0995706	0.218976	Negative selection	3.31902
172	Segmental duplication	Lus10025921	Lus10038180	0.025631	0.167517	0.153006	Negative selection	5.58389
173	Segmental duplication	Lus10026226	Lus10020145	0.250305	0.746195	0.335442	Negative selection	24.8732
174	Segmental duplication	Lus10026226	Lus10026941	0.252701	0.848645	0.29777	Negative selection	28.2882
175	Segmental duplication	Lus10026648	Lus10004666	0.0192627	0.142438	0.135235	Negative selection	4.74795
176	Segmental duplication	Lus10026856	Lus10020229	0.00585976	0.0896792	0.0653414	Negative selection	2.98931
177	Segmental duplication	Lus10026941	Lus10020145	0.0397142	0.0809328	0.490706	Negative selection	2.69776
178	Segmental duplication	Lus10027023	Lus10025563	0.0292461	0.182717	0.160062	Negative selection	6.09055
179	Segmental duplication	Lus10027027	Lus10025566	0.0100523	0.101383	0.0991519	Negative selection	3.37944
180	Segmental duplication	Lus10027441	Lus10005754	0.0320061	0.163987	0.195175	Negative selection	5.46623
181	Segmental duplication	Lus10027736	Lus10035553	0.32769	0.858877	0.381532	Negative selection	28.6292
182	Segmental duplication	Lus10027744	Lus10017197	0.325376	0.860908	0.377946	Negative selection	28.6969
183	Segmental duplication	Lus10027744	Lus10021113	0.269369	1.02932	0.261695	Negative selection	34.3108
184	Segmental duplication	Lus10027744	Lus10035549	0.0646994	0.129721	0.498758	Negative selection	4.32403
185	Segmental duplication	Lus10027921	Lus10014366	0.345025	1.35793	0.254082	Negative selection	45.2642
186	Segmental duplication	Lus10027994	Lus10008163	0.018234	0.209336	0.0871039	Negative selection	6.97788
187	Segmental duplication	Lus10028009	Lus10012376	0.0957713	0.1108	0.86436	Negative selection	3.69334
188	Segmental duplication	Lus10028063	Lus10025612	0.0319128	0.237474	0.134384	Negative selection	7.91581
189	Segmental duplication	Lus10028773	Lus10017510	0.0521233	0.109617	0.475503	Negative selection	3.65391
190	Segmental duplication	Lus10028773	Lus10024657	0.197572	0.667575	0.295955	Negative selection	22.2525
191	Segmental duplication	Lus10028827	Lus10017455	0.0220513	0.156435	0.140961	Negative selection	5.21452
192	Segmental duplication	Lus10029136	Lus10013027	0.0164452	0.0933134	0.176236	Negative selection	3.11045
193	Segmental duplication	Lus10029136	Lus10030599	0.0808319	1.05765	0.0764259	Negative selection	35.255
194	Segmental duplication	Lus10029136	Lus10030891	0.209686	1.52109	0.137853	Negative selection	50.7029
195	Segmental duplication	Lus10029178	Lus10012987	0.0104585	0.0869246	0.120317	Negative selection	2.89749
196	Segmental duplication	Lus10029178	Lus10014526	0.356676	1.55763	0.228986	Negative selection	51.921
197	Segmental duplication	Lus10029242	Lus10025394	0.464633	0.75671	0.614017	Negative selection	25.2237
198	Segmental duplication	Lus10029292	Lus10021063	0.147446	0.81021	0.181985	Negative selection	27.007
199	Segmental duplication	Lus10029351	Lus10013606	0.205711	0.852066	0.241427	Negative selection	28.4022
200	Segmental duplication	Lus10029351	Lus10021245	0.199	0.780058	0.255109	Negative selection	26.0019
201	Segmental duplication	Lus10029940	Lus10004467	0.0536291	0.0867015	0.618548	Negative selection	2.89005
202	Segmental duplication	Lus10029990	Lus10035332	0.00507938	0.103529	0.0490622	Negative selection	3.45098
203	Segmental duplication	Lus10029993	Lus10015152	0.201941	0.706286	0.285919	Negative selection	23.5429
204	Segmental duplication	Lus10029993	Lus10035335	0.00393702	0.0574443	0.0685362	Negative selection	1.91481
205	Segmental duplication	Lus10030117	Lus10001683	0.0270379	0.0990448	0.272987	Negative selection	3.30149
206	Segmental duplication	Lus10030120	Lus10001685	0.0373635	0.0639109	0.584619	Negative selection	2.13036
207	Segmental duplication	Lus10030464	Lus10012819	0.0464017	0.127748	0.363229	Negative selection	4.25826
208	Segmental duplication	Lus10030464	Lus10036757	0.397994	1.03055	0.386195	Negative selection	34.3517
209	Segmental duplication	Lus10030464	Lus10037170	0.376372	1.15012	0.327246	Negative selection	38.3373
210	Segmental duplication	Lus10030472	Lus10012826	0.178156	0.337431	0.527977	Negative selection	11.2477
211	Segmental duplication	Lus10030472	Lus10036754	0.259926	1.04102	0.249684	Negative selection	34.7007
212	Segmental duplication	Lus10030472	Lus10037172	0.272603	1.14363	0.238365	Negative selection	38.1211
213	Segmental duplication	Lus10030599	Lus10013027	0.0766777	0.964263	0.0795195	Negative selection	32.1421
214	Segmental duplication	Lus10030728	Lus10013210	0.0274526	0.210762	0.130254	Negative selection	7.02541
215	Segmental duplication	Lus10030728	Lus10016040	0.19412	0.678246	0.286209	Negative selection	22.6082
216	Segmental duplication	Lus10030755	Lus10013235	0.0165118	0.316955	0.052095	Negative selection	10.5652
217	Segmental duplication	Lus10030891	Lus10013027	0.105776	0.978075	0.108148	Negative selection	32.6025
218	Segmental duplication	Lus10030891	Lus10030599	0.0399823	0.177015	0.225869	Negative selection	5.9005
219	Segmental duplication	Lus10031491	Lus10020655	0.309354	1.05112	0.294308	Negative selection	35.0374
220	Segmental duplication	Lus10031491	Lus10029886	0.317896	1.11144	0.286022	Negative selection	37.0481
221	Segmental duplication	Lus10031515	Lus10000333	0.231603	1.17111	0.197763	Negative selection	39.037
222	Segmental duplication	Lus10031515	Lus10015167	0.0721605	0.320446	0.225188	Negative selection	10.6815
223	Segmental duplication	Lus10031549	Lus10015126	0.299668	0.55257	0.542316	Negative selection	18.419
224	Segmental duplication	Lus10031618	Lus10033725	0.0246159	0.135701	0.181398	Negative selection	4.52336
225	Segmental duplication	Lus10031728	Lus10031152	0.00909447	0.0893248	0.101813	Negative selection	2.97749
226	Segmental duplication	Lus10031780	Lus10031202	0.0482537	0.211455	0.228198	Negative selection	7.04851
227	Segmental duplication	Lus10031993	Lus10035163	0.00992511	0.0539425	0.183994	Negative selection	1.79808
228	Segmental duplication	Lus10032119	Lus10022324	0.227143	0.80187	0.283267	Negative selection	26.729
229	Segmental duplication	Lus10032161	Lus10014526	0.0095334	0.0943221	0.101073	Negative selection	3.14407
230	Segmental duplication	Lus10032265	Lus10024629	0.0677151	0.222549	0.304271	Negative selection	7.4183
231	Segmental duplication	Lus10032270	Lus10024635	0.0314309	0.0878663	0.357712	Negative selection	2.92888
232	Segmental duplication	Lus10032290	Lus10017510	0.212509	0.785016	0.270706	Negative selection	26.1672
233	Segmental duplication	Lus10032290	Lus10024657	0.0176776	0.124942	0.141486	Negative selection	4.16473
234	Segmental duplication	Lus10032290	Lus10028773	0.23346	0.784694	0.297518	Negative selection	26.1565
235	Segmental duplication	Lus10033053	Lus10017764	0.0204278	0.122162	0.167218	Negative selection	4.07208
236	Segmental duplication	Lus10033075	Lus10017750	0.0240105	0.0868881	0.276339	Negative selection	2.89627
237	Segmental duplication	Lus10033682	Lus10017722	0.0764403	0.280066	0.272936	Negative selection	9.33554
238	Segmental duplication	Lus10034157	Lus10008972	0.618484	NaN	NaN	Negative selection	#VALUE!
239	Segmental duplication	Lus10034157	Lus10043426	0.010788	0.0624676	0.172698	Negative selection	2.08225
240	Segmental duplication	Lus10034551	Lus10005617	0.207413	1.09281	0.189798	Negative selection	36.4271
241	Segmental duplication	Lus10034551	Lus10017253	0.201578	1.46354	0.137733	Negative selection	48.7847
242	Segmental duplication	Lus10034551	Lus10021842	0.0431099	0.232616	0.185326	Negative selection	7.75387
243	Segmental duplication	Lus10034640	Lus10035271	0.00905535	0.193059	0.0469046	Negative selection	6.4353
244	Segmental duplication	Lus10034644	Lus10007967	0.51498	1.2669	0.406489	Negative selection	42.2299
245	Segmental duplication	Lus10034644	Lus10013497	0.567641	1.64461	0.345152	Negative selection	54.8204
246	Segmental duplication	Lus10034644	Lus10021722	0.0545776	0.0751012	0.72672	Negative selection	2.50337
247	Segmental duplication	Lus10034667	Lus10017865	0.0185151	0.109375	0.169281	Negative selection	3.64582
248	Segmental duplication	Lus10035010	Lus10019102	0.145401	0.670088	0.216988	Negative selection	22.3363
249	Segmental duplication	Lus10035010	Lus10021670	0.0243028	0.145683	0.16682	Negative selection	4.85609
250	Segmental duplication	Lus10035010	Lus10034454	0.131042	0.701542	0.186791	Negative selection	23.3847
251	Segmental duplication	Lus10035010	Lus10037172	0.295736	NaN	NaN	NaN	#VALUE!
252	Segmental duplication	Lus10035023	Lus10021683	0.016286	0.088411	0.184208	Negative selection	2.94703
253	Segmental duplication	Lus10035057	Lus10021710	0.0184479	0.0998866	0.184688	Negative selection	3.32955
254	Segmental duplication	Lus10035271	Lus10013491	0.148712	1.02964	0.14443	Negative selection	34.3215
255	Segmental duplication	Lus10035335	Lus10015152	0.224158	0.780614	0.287156	Negative selection	26.0205
256	Segmental duplication	Lus10035368	Lus10000487	0.3497	1.51118	0.231409	Negative selection	50.3726
257	Segmental duplication	Lus10035368	Lus10004572	0.334081	1.50119	0.222544	Negative selection	50.0396
258	Segmental duplication	Lus10035368	Lus10030972	0.0486563	0.156014	0.311872	Negative selection	5.20045
259	Segmental duplication	Lus10035549	Lus10017197	0.393458	0.732213	0.537355	Negative selection	24.4071
260	Segmental duplication	Lus10035549	Lus10021113	0.312539	0.919735	0.339815	Negative selection	30.6578
261	Segmental duplication	Lus10035677	Lus10037264	0.0356831	0.123284	0.289439	Negative selection	4.10946
262	Segmental duplication	Lus10036034	Lus10009695	0.0240158	0.141232	0.170045	Negative selection	4.70774
263	Segmental duplication	Lus10036140	Lus10018125	0.0484927	0.108418	0.447276	Negative selection	3.61393
264	Segmental duplication	Lus10036202	Lus10018293	0.188285	0.624467	0.301514	Negative selection	20.8156
265	Segmental duplication	Lus10036202	Lus10038341	0.0295181	0.196897	0.149916	Negative selection	6.56325
266	Segmental duplication	Lus10036202	Lus10040616	0.176549	0.564853	0.312557	Negative selection	18.8284
267	Segmental duplication	Lus10036378	Lus10017510	0.387653	0.921731	0.420571	Negative selection	30.7244
268	Segmental duplication	Lus10036378	Lus10024657	0.387482	1.06743	0.363005	Negative selection	35.5809
269	Segmental duplication	Lus10036378	Lus10032290	0.386369	0.986462	0.391671	Negative selection	32.8821
270	Segmental duplication	Lus10036404	Lus10041079	0.120135	0.354129	0.33924	Negative selection	11.8043
271	Segmental duplication	Lus10036466	Lus10041134	0.0459491	0.182466	0.251823	Negative selection	6.08219
272	Segmental duplication	Lus10036569	Lus10041359	0.0408509	0.0722534	0.565384	Negative selection	2.40845
273	Segmental duplication	Lus10037053	Lus10036934	0.0181775	0.162711	0.111716	Negative selection	5.42372
274	Segmental duplication	Lus10037170	Lus10036757	0.0260189	0.231214	0.112531	Negative selection	7.70714
275	Segmental duplication	Lus10037172	Lus10036754	0.0323592	0.23526	0.137547	Negative selection	7.84199
276	Segmental duplication	Lus10037812	Lus10017092	0.0150555	0.067079	0.224444	Negative selection	2.23597
277	Segmental duplication	Lus10037906	Lus10038632	0.0977856	0.161717	0.604673	Negative selection	5.39055
278	Segmental duplication	Lus10037928	Lus10017455	0.110495	0.548292	0.201527	Negative selection	18.2764
279	Segmental duplication	Lus10037928	Lus10028827	0.106576	0.545603	0.195336	Negative selection	18.1868
280	Segmental duplication	Lus10037928	Lus10038656	0.0203601	0.116065	0.17542	Negative selection	3.86883
281	Segmental duplication	Lus10038048	Lus10004521	0.226552	0.875072	0.258896	Negative selection	29.1691
282	Segmental duplication	Lus10038656	Lus10017455	0.106591	0.50598	0.210663	Negative selection	16.866
283	Segmental duplication	Lus10038656	Lus10028827	0.103502	0.520603	0.198813	Negative selection	17.3534
284	Segmental duplication	Lus10038731	Lus10039127	0.0708826	0.192137	0.368917	Negative selection	6.40456
285	Segmental duplication	Lus10039821	Lus10018489	0.611062	2.09935	0.291072	Negative selection	69.9782
286	Segmental duplication	Lus10039821	Lus10018589	0.0585178	0.242404	0.241407	Negative selection	8.08012
287	Segmental duplication	Lus10039821	Lus10033697	0.344043	0.97504	0.35285	Negative selection	32.5013
288	Segmental duplication	Lus10039845	Lus10018609	0.0330437	0.148227	0.222926	Negative selection	4.94092
289	Segmental duplication	Lus10039848	Lus10018613	0.00665423	0.163176	0.0407795	Negative selection	5.43919
290	Segmental duplication	Lus10040240	Lus10028249	0.0327809	0.078503	0.417575	Negative selection	2.61677
291	Segmental duplication	Lus10040278	Lus10004712	0.0161659	0.22449	0.0720115	Negative selection	7.48301
292	Segmental duplication	Lus10040616	Lus10038341	0.177185	0.670372	0.264308	Negative selection	22.3457
293	Segmental duplication	Lus10040716	Lus10017197	0.430724	2.15779	0.199613	Negative selection	71.9264
294	Segmental duplication	Lus10040716	Lus10021113	0.424529	2.25654	0.188132	Negative selection	75.2181
295	Segmental duplication	Lus10040783	Lus10000023	0.424708	1.73094	0.245363	Negative selection	57.6979
296	Segmental duplication	Lus10040783	Lus10004712	0.306155	2.58862	0.11827	Negative selection	86.2873
297	Segmental duplication	Lus10040783	Lus10040278	0.23886	2.02787	0.117788	Negative selection	67.5958
298	Segmental duplication	Lus10040914	Lus10009810	0.00917443	0.0299541	0.306283	Negative selection	0.998469
299	Segmental duplication	Lus10040942	Lus10009832	0.0209027	0.262544	0.0796161	Negative selection	8.75147
300	Segmental duplication	Lus10041063	Lus10006161	0.0518841	0.162781	0.318735	Negative selection	5.42605
301	Segmental duplication	Lus10041244	Lus10021953	0.0764221	0.216903	0.352333	Negative selection	7.2301
302	Segmental duplication	Lus10041300	Lus10037412	0.0155564	0.131409	0.118382	Negative selection	4.38029
303	Segmental duplication	Lus10041689	Lus10024057	0.0209777	0.0648744	0.323359	Negative selection	2.16248
304	Segmental duplication	Lus10041859	Lus10028406	0	0.0768262	0	Negative selection	2.56087
305	Segmental duplication	Lus10041896	Lus10028443	0.129256	0.283889	0.455304	Negative selection	9.46295
306	Segmental duplication	Lus10041970	Lus10017978	0.0131305	0.126504	0.103795	Negative selection	4.21681
307	Segmental duplication	Lus10042443	Lus10020145	0.235049	0.693871	0.338751	Negative selection	23.129
308	Segmental duplication	Lus10042443	Lus10026226	0.0290483	0.110897	0.261939	Negative selection	3.69657
309	Segmental duplication	Lus10042443	Lus10026941	0.243784	0.724428	0.336519	Negative selection	24.1476
310	Segmental duplication	Lus10042969	Lus10032471	0.0103019	0.0640257	0.160902	Negative selection	2.13419
311	Segmental duplication	Lus10043353	Lus10019507	0.0318569	0.194775	0.163558	Negative selection	6.49249
312	Segmental duplication	Lus10043426	Lus10008972	0.619513	NaN	NaN	NaN	#VALUE!
1	Tandom duplication	Lus10000023	Lus10024372	0.0134961	0.21333	0.0632642	Negative selection	7.111
2	Tandom duplication	Lus10000333	Lus10004460	0.0267444	0.250444	0.106788	Negative selection	8.34812
3	Tandom duplication	Lus10000412	Lus10026104	0.0355211	0.206056	0.172385	Negative selection	6.86854
4	Tandom duplication	Lus10000513	Lus10002706	0.0161427	0.119711	0.134848	Negative selection	3.99035
5	Tandom duplication	Lus10001209	Lus10005859	0.0130865	0.130369	0.10038	Negative selection	4.34565
6	Tandom duplication	Lus10002051	Lus10002391	0.120413	0.213985	0.562719	Negative selection	7.13283
7	Tandom duplication	Lus10002487	Lus10004813	0.0425577	0.0819214	0.519494	Negative selection	2.73071
8	Tandom duplication	Lus10002939	Lus10002940	0.00935765	0.033038	0.283239	Negative selection	1.10127
9	Tandom duplication	Lus10003525	Lus10003526	0.108267	0.165279	0.655055	Negative selection	5.50929
10	Tandom duplication	Lus10004568	Lus10004569	0.329491	0.767007	0.42958	Negative selection	25.5669
11	Tandom duplication	Lus10004821	Lus10002491	0.00897677	0.124468	0.0721212	Negative selection	4.14893
12	Tandom duplication	Lus10005815	Lus10005814	0.196262	0.829865	0.236499	Negative selection	27.6622
13	Tandom duplication	Lus10005816	Lus10005815	0.213483	0.654817	0.326019	Negative selection	21.8272
14	Tandom duplication	Lus10006448	Lus10006447	0.465043	2.56696	0.181165	Negative selection	85.5654
15	Tandom duplication	Lus10006788	Lus10006787	0.313378	0.981468	0.319295	Negative selection	32.7156
16	Tandom duplication	Lus10007936	Lus10007937	0.197083	0.502808	0.391965	Negative selection	16.7603
17	Tandom duplication	Lus10010513	Lus10034049	0.0215679	0.131271	0.1643	Negative selection	4.37571
18	Tandom duplication	Lus10011391	Lus10011390	0.464106	2.74467	0.169094	Negative selection	91.4889
19	Tandom duplication	Lus10016428	Lus10016427	0.485738	1.1404	0.425936	Negative selection	38.0133
20	Tandom duplication	Lus10018125	Lus10018126	0.0671538	0.1932	0.347587	Negative selection	6.44001
21	Tandom duplication	Lus10019686	Lus10019685	0.52242	0.996387	0.524314	Negative selection	33.2129
22	Tandom duplication	Lus10021953	Lus10021954	0.0746708	0.216189	0.345395	Negative selection	7.20631
23	Tandom duplication	Lus10021993	Lus10042532	0.0689617	0.0915235	0.753487	Negative selection	3.05078
24	Tandom duplication	Lus10025145	Lus10025146	0.461441	0.952546	0.484429	Negative selection	31.7515
25	Tandom duplication	Lus10036128	Lus10036127	0.442963	1.66555	0.265956	Negative selection	55.5184
26	Tandom duplication	Lus10041244	Lus10041245	0.0581306	0.161223	0.360561	Negative selection	5.37409
27	Tandom duplication	Lus10041245	Lus10041246	0.0732541	0.163405	0.448297	Negative selection	5.44685
