# Supplementary material for: Genome-wide identification of RING finger genes in flax (Linum usitatissimum) and analyses of their evolution
Source: PeerJ. 2021 Nov 15;9:e12491. doi: 10.7717/peerj.12491 (PMC8601054; doi:10.7717/peerj.12491)
Supplement: Supplemental Information 15 [file peerj-09-12491-s015.xlsx]

## Sheet: Flax_Aspen
Table S4. Orthologous relationships of RING finger genes between flax and other four plant species.
NO.	Flax RING ID	Aspen RING ID	Ka	Ks	Ka/Ks	Selection pressure
1	Lus10036034	Potri.001G275900.10	0.183833	1.3889	0.132359	Negative selection
2	Lus10009695	Potri.001G275900.10	0.179149	1.35406	0.132305	Negative selection
3	Lus10008447	Potri.001G213800.7	0.225382	1.2223	0.184391	Negative selection
4	Lus10018140	Potri.002G080900.1	0.516662	NaN	NaN	NaN
5	Lus10014749	Potri.002G044100.9	0.275404	1.04883	0.262583	Negative selection
6	Lus10025921	Potri.002G243800.1	0.404371	2.50928	0.16115	Negative selection
7	Lus10025930	Potri.002G241900.8	0.514554	1.64233	0.313308	Negative selection
8	Lus10010069	Potri.002G189700.2	0.236336	1.50729	0.156796	Negative selection
9	Lus10018817	Potri.002G164000.2	0.439368	1.40254	0.313267	Negative selection
10	Lus10012062	Potri.004G143900.1	0.380709	1.82462	0.208651	Negative selection
11	Lus10005084	Potri.004G114800.1	0.11399	0.695191	0.16397	Negative selection
12	Lus10006558	Potri.005G054400.1	0.286981	1.03278	0.277872	Negative selection
13	Lus10018140	Potri.005G180300.1	0.503081	NaN	NaN	NaN
14	Lus10014749	Potri.005G219000.6	0.247415	1.02717	0.24087	Negative selection
15	Lus10027744	Potri.006G094000.1	0.359134	2.1973	0.163444	Negative selection
16	Lus10035549	Potri.006G094000.1	0.37284	2.75474	0.135345	Negative selection
17	Lus10035553	Potri.006G120200.4	0.268907	1.28705	0.208932	Negative selection
18	Lus10042443	Potri.006G274700.3	0.34587	1.34571	0.257016	Negative selection
19	Lus10027027	Potri.007G126900.1	0.116742	1.19098	0.0980222	Negative selection
20	Lus10005111	Potri.008G123300.1	0.133452	1.07625	0.123997	Negative selection
21	Lus10036034	Potri.009G070600.1	0.16732	1.55101	0.107878	Negative selection
22	Lus10009695	Potri.009G070600.1	0.165019	1.60645	0.102723	Negative selection
23	Lus10012033	Potri.009G110000.3	0.375509	NaN	NaN	NaN
24	Lus10042348	Potri.009G111200.3	0.161554	1.1929	0.13543	Negative selection
25	Lus10020487	Potri.009G080500.2	0.236534	1.32995	0.177852	Negative selection
26	Lus10042277	Potri.009G073900.2	0.551791	2.22738	0.247731	Negative selection
27	Lus10022585	Potri.009G013300.1	0.225138	1.10846	0.203108	Negative selection
28	Lus10022585	Potri.009G013300.1	0.225138	1.10846	0.203108	Negative selection
29	Lus10016102	Potri.009G010350.1	0.260142	2.18779	0.118906	Negative selection
30	Lus10005111	Potri.010G122200.1	0.131529	1.098	0.119789	Negative selection
31	Lus10029136	Potri.010G042200.1	0.146598	NaN	NaN	NaN
32	Lus10018110	Potri.012G015500.1	0.0646072	2.55993	0.0252378	Negative selection
33	Lus10029178	Potri.012G078200.1	0.34022	2.80992	0.121078	Negative selection
34	Lus10006558	Potri.013G042000.1	0.284429	1.06729	0.266498	Negative selection
35	Lus10006074	Potri.013G111500.2	0.179414	1.33673	0.134219	Negative selection
36	Lus10010069	Potri.014G114900.1	0.227094	1.41818	0.16013	Negative selection
37	Lus10018817	Potri.014G089800.4	0.386732	1.62513	0.237971	Negative selection
38	Lus10027994	Potri.014G138000.1	0.0735055	1.2352	0.0595091	Negative selection
39	Lus10018110	Potri.015G013000.1	0.0717924	1.76662	0.0406383	Negative selection
40	Lus10016195	Potri.016G066400.5	0.253191	1.16752	0.216861	Negative selection
41	Lus10035549	Potri.016G105900.2	0.362652	4.85194	0.0747438	Negative selection
42	Lus10022743	Potri.016G136200.1	0.400421	NaN	NaN	NaN
43	Lus10027744	Potri.016G105900.2	0.343904	1.83889	0.187017	Negative selection
44	Lus10016255	Potri.016G058300.1	0.21789	1.55929	0.139736	Negative selection
45	Lus10005084	Potri.017G100100.3	0.0968342	0.706532	0.137056	Negative selection
46	Lus10027027	Potri.017G032000.1	0.114703	1.2854	0.0892352	Negative selection
47	Lus10006074	Potri.019G082500.1	0.166769	1.61837	0.103047	Negative selection
48	Lus10016348	Potri.001G026200.1	0.116721	1.47409	0.0791817	Negative selection
49	Lus10016416	Potri.001G267700.4	0.189207	1.73781	0.108877	Negative selection
50	Lus10013210	Potri.002G006400.1	0.236693	2.27359	0.104106	Negative selection
51	Lus10016303	Potri.002G133000.1	0.0733803	0.851323	0.0861957	Negative selection
52	Lus10038048	Potri.002G189700.2	0.253641	1.31649	0.192665	Negative selection
53	Lus10016348	Potri.003G198600.1	0.0770002	1.51438	0.050846	Negative selection
54	Lus10030699	Potri.004G125400.5	0.201998	1.27987	0.157826	Negative selection
55	Lus10021842	Potri.005G244500.1	0.307925	NaN	NaN	NaN
56	Lus10016426	Potri.005G081500.3	0.0619643	1.19299	0.0519402	Negative selection
57	Lus10013210	Potri.005G255200.1	0.239545	1.87518	0.127745	Negative selection
58	Lus10020145	Potri.006G274700.3	0.316327	1.36644	0.231497	Negative selection
59	Lus10016426	Potri.007G085900.1	0.0658355	0.977055	0.0673815	Negative selection
60	Lus10012826	Potri.008G086300.2	0.121672	1.56095	0.0779474	Negative selection
61	Lus10012819	Potri.008G087200.1	0.305213	2.08093	0.146671	Negative selection
62	Lus10021710	Potri.008G116400.1	0.163765	1.05606	0.155072	Negative selection
63	Lus10035271	Potri.008G127400.8	0.240297	1.29118	0.186106	Negative selection
64	Lus10038656	Potri.008G030100.3	0.127747	1.00598	0.126988	Negative selection
65	Lus10006463	Potri.008G183600.3	0.16685	NaN	NaN	NaN
66	Lus10021801	Potri.008G134900.1	0.182475	1.79362	0.101735	Negative selection
67	Lus10016416	Potri.009G062100.2	0.194401	1.50679	0.129017	Negative selection
68	Lus10038656	Potri.010G231100.4	0.136243	0.908227	0.15001	Negative selection
69	Lus10006463	Potri.010G049600.3	0.203648	4.09129	0.0497761	Negative selection
70	Lus10006448	Potri.010G052700.1	0.16257	1.88535	0.0862278	Negative selection
71	Lus10006447	Potri.010G053000.6	0.151098	2.00082	0.075518	Negative selection
72	Lus10030599	Potri.010G042200.1	0.134293	1.63419	0.0821769	Negative selection
73	Lus10021801	Potri.010G106300.1	0.20463	1.30562	0.15673	Negative selection
74	Lus10012826	Potri.010G169200.1	0.13841	1.36189	0.101631	Negative selection
75	Lus10012819	Potri.010G168300.1	0.304542	2.2743	0.133906	Negative selection
76	Lus10004666	Potri.010G161100.3	0.31382	1.4646	0.21427	Negative selection
77	Lus10035271	Potri.010G115600.3	0.220265	1.29159	0.170537	Negative selection
78	Lus10016303	Potri.014G040400.1	0.0898308	0.933197	0.0962613	Negative selection
79	Lus10038048	Potri.014G114900.1	0.247453	1.18524	0.208779	Negative selection
80	Lus10030699	Potri.017G090000.1	0.175857	1.10461	0.159203	Negative selection
81	Lus10020145	Potri.018G005600.2	0.331715	1.25865	0.263548	Negative selection
82	Lus10038095	Potri.018G128100.1	0.159676	1.13035	0.141263	Negative selection
83	Lus10012867	Potri.019G060900.1	0.213263	1.03984	0.205093	Negative selection
84	Lus10037580	Potri.001G186000.1	0.138273	1.1368	0.121633	Negative selection
85	Lus10040716	Potri.001G246700.1	0.20006	1.31868	0.151713	Negative selection
86	Lus10040829	Potri.001G238800.1	0.11409	1.08736	0.104924	Negative selection
87	Lus10023068	Potri.001G089900.2	0.318601	1.10526	0.288259	Negative selection
88	Lus10023055	Potri.001G088400.2	0.312883	1.60917	0.194438	Negative selection
89	Lus10033860	Potri.002G044100.9	0.275518	0.993439	0.277338	Negative selection
90	Lus10004521	Potri.002G189700.2	0.248586	1.4345	0.173291	Negative selection
91	Lus10012628	Potri.002G170300.1	0.360752	5.53191	0.0652129	Negative selection
92	Lus10023055	Potri.003G142600.1	0.409694	2.1944	0.1867	Negative selection
93	Lus10013397	Potri.003G223200.5	0.256703	1.34357	0.191061	Negative selection
94	Lus10037580	Potri.003G051500.1	0.133265	1.1139	0.119638	Negative selection
95	Lus10029245	Potri.004G059600.2	0.0740881	1.44472	0.0512822	Negative selection
96	Lus10029242	Potri.004G059200.2	0.453926	1.35822	0.334208	Negative selection
97	Lus10033860	Potri.005G219000.6	0.24444	0.988163	0.247368	Negative selection
98	Lus10008106	Potri.006G247000.1	0.201987	1.24236	0.162584	Negative selection
99	Lus10040783	Potri.006G087800.1	0.321155	NaN	NaN	NaN
100	Lus10037172	Potri.008G086300.2	0.144559	2.7035	0.0534711	Negative selection
101	Lus10037170	Potri.008G087200.1	0.419723	1.43969	0.291536	Negative selection
102	Lus10037162	Potri.008G088500.1	0.357118	2.05622	0.173677	Negative selection
103	Lus10006253	Potri.008G181300.1	0.145886	1.7572	0.0830219	Negative selection
104	Lus10007936	Potri.008G125700.1	0.553575	NaN	NaN	NaN
105	Lus10037490	Potri.008G219200.1	0.335132	2.37508	0.141104	Negative selection
106	Lus10013475	Potri.008G125700.1	0.499777	2.17993	0.229262	Negative selection
107	Lus10007106	Potri.009G080500.2	0.231542	1.48324	0.156105	Negative selection
108	Lus10037410	Potri.009G013300.1	0.268336	1.03574	0.259076	Negative selection
109	Lus10040716	Potri.009G039700.1	0.209897	1.26798	0.165537	Negative selection
110	Lus10040829	Potri.009G030000.1	0.111083	1.28662	0.0863376	Negative selection
111	Lus10013491	Potri.010G115800.2	0.146322	1.47834	0.0989769	Negative selection
112	Lus10013475	Potri.010G118000.1	0.590369	2.23949	0.263618	Negative selection
113	Lus10040783	Potri.010G201300.1	0.313735	NaN	NaN	NaN
114	Lus10037172	Potri.010G169200.1	0.177669	4.62312	0.0384306	Negative selection
115	Lus10037170	Potri.010G168300.1	0.429212	1.65163	0.259871	Negative selection
116	Lus10037053	Potri.010G053000.6	0.180738	1.10682	0.163295	Negative selection
117	Lus10006253	Potri.010G052700.1	0.143651	1.94793	0.0737455	Negative selection
118	Lus10019150	Potri.010G133200.1	0.653803	NaN	NaN	NaN
119	Lus10007936	Potri.010G118000.1	0.536476	NaN	NaN	NaN
120	Lus10037490	Potri.010G010500.1	0.36444	1.98094	0.183973	Negative selection
121	Lus10021954	Potri.010G027900.8	0.216074	1.12748	0.191644	Negative selection
122	Lus10029245	Potri.011G069600.1	0.0780838	1.4244	0.0548186	Negative selection
123	Lus10029242	Potri.011G068800.1	0.39229	1.68555	0.232737	Negative selection
124	Lus10005275	Potri.011G063100.1	0.508948	2.15654	0.236001	Negative selection
125	Lus10003473	Potri.012G067200.3	0.274974	1.28168	0.214543	Negative selection
126	Lus10019075	Potri.012G068100.1	0.188438	1.09979	0.171339	Negative selection
127	Lus10040613	Potri.012G119200.1	0.296181	2.53768	0.116714	Negative selection
128	Lus10040616	Potri.012G119000.1	0.201244	1.36567	0.147359	Negative selection
129	Lus10004521	Potri.014G114900.1	0.247232	1.37917	0.179262	Negative selection
130	Lus10012628	Potri.014G098200.1	0.374706	2.77783	0.134892	Negative selection
131	Lus10040613	Potri.015G118000.1	0.295353	1.93545	0.152601	Negative selection
132	Lus10040616	Potri.015G117600.1	0.203055	1.60645	0.1264	Negative selection
133	Lus10008106	Potri.018G034400.2	0.207041	1.28784	0.160765	Negative selection
134	Lus10005389	Potri.001G032300.2	0.361513	NaN	NaN	NaN
135	Lus10041603	Potri.001G036100.3	0.110488	1.02984	0.107287	Negative selection
136	Lus10029993	Potri.002G224200.1	0.240567	NaN	NaN	NaN
137	Lus10030375	Potri.002G205400.1	0.19849	1.29901	0.152801	Negative selection
138	Lus10030248	Potri.002G171500.1	0.0991426	2.91467	0.034015	Negative selection
139	Lus10005389	Potri.003G192700.1	0.351707	1.98553	0.177135	Negative selection
140	Lus10041603	Potri.003G189400.2	0.115219	1.02462	0.11245	Negative selection
141	Lus10004058	Potri.004G093500.2	0.202782	1.65807	0.1223	Negative selection
142	Lus10029990	Potri.004G002700.1	0.178397	NaN	NaN	NaN
143	Lus10034367	Potri.004G114800.1	0.133914	0.687888	0.194675	Negative selection
144	Lus10020655	Potri.005G024700.1	0.179424	1.55485	0.115396	Negative selection
145	Lus10029940	Potri.005G035600.1	0.31682	1.46432	0.216359	Negative selection
146	Lus10041859	Potri.005G108200.1	0.0675162	2.0526	0.032893	Negative selection
147	Lus10041907	Potri.005G113200.1	0.632787	NaN	NaN	NaN
148	Lus10041896	Potri.005G111100.7	0.206184	1.49043	0.138338	Negative selection
149	Lus10010392	Potri.007G050500.1	0.417032	1.52399	0.273644	Negative selection
150	Lus10041907	Potri.007G057300.1	0.706793	NaN	NaN	NaN
151	Lus10036754	Potri.008G086300.2	0.105814	2.48039	0.0426603	Negative selection
152	Lus10036937	Potri.008G181300.1	0.148984	1.6907	0.0881199	Negative selection
153	Lus10034346	Potri.008G123300.1	0.133699	1.11192	0.120241	Negative selection
154	Lus10009832	Potri.008G071000.1	0.446216	2.47188	0.180517	Negative selection
155	Lus10034346	Potri.010G122200.1	0.133206	1.14433	0.116405	Negative selection
156	Lus10036754	Potri.010G169200.1	0.132325	1.81981	0.0727138	Negative selection
157	Lus10036757	Potri.010G168300.1	0.405623	1.35057	0.300334	Negative selection
158	Lus10013027	Potri.010G042200.1	0.144762	2.3889	0.060598	Negative selection
159	Lus10036934	Potri.010G053000.6	0.176535	1.2766	0.138285	Negative selection
160	Lus10036937	Potri.010G052700.1	0.147341	1.92867	0.0763949	Negative selection
161	Lus10034407	Potri.010G133200.1	0.646438	2.56825	0.251704	Negative selection
162	Lus10015732	Potri.012G067200.3	0.254936	1.47193	0.173198	Negative selection
163	Lus10015722	Potri.012G068100.1	0.151367	1.03129	0.146775	Negative selection
164	Lus10013027	Potri.012G082200.2	0.400887	NaN	NaN	NaN
165	Lus10012987	Potri.012G078200.1	0.355605	3.06694	0.115948	Negative selection
166	Lus10020655	Potri.013G015600.1	0.182758	1.92342	0.0950171	Negative selection
167	Lus10029037	Potri.013G091300.1	0.195269	NaN	NaN	NaN
168	Lus10039821	Potri.013G132300.2	0.483162	NaN	NaN	NaN
169	Lus10030375	Potri.014G130300.1	0.173169	1.92897	0.0897729	Negative selection
170	Lus10030248	Potri.014G099200.1	0.109244	2.54175	0.0429799	Negative selection
171	Lus10029990	Potri.014G159300.5	0.0922749	1.49186	0.0618522	Negative selection
172	Lus10029993	Potri.014G158900.2	0.263173	NaN	NaN	NaN
173	Lus10030044	Potri.014G154600.4	0.202125	1.33583	0.151311	Negative selection
174	Lus10034367	Potri.017G100100.3	0.105098	0.74485	0.1411	Negative selection
175	Lus10004058	Potri.017G122300.6	0.207768	1.44297	0.143987	Negative selection
176	Lus10039821	Potri.019G100800.8	0.520069	3.742	0.138982	Negative selection
177	Lus10029037	Potri.019G057700.2	0.248011	NaN	NaN	NaN
178	Lus10039607	Potri.001G266400.4	0.0842092	1.0179	0.0827284	Negative selection
179	Lus10008283	Potri.001G450700.1	0.66365	NaN	NaN	NaN
180	Lus10008286	Potri.001G452800.2	0.293129	1.43172	0.204739	Negative selection
181	Lus10024116	Potri.001G036400.1	0.11751	1.01116	0.116212	Negative selection
182	Lus10032270	Potri.001G101700.6	0.289564	1.05927	0.273362	Negative selection
183	Lus10032290	Potri.001G101000.2	0.183259	NaN	NaN	NaN
184	Lus10032382	Potri.001G091700.1	0.440422	2.57366	0.171127	Negative selection
185	Lus10032402	Potri.001G089900.2	0.322132	1.05145	0.306371	Negative selection
186	Lus10032418	Potri.001G088400.2	0.317125	1.35824	0.233481	Negative selection
187	Lus10024124	Potri.001G032300.2	0.31784	2.41353	0.131691	Negative selection
188	Lus10024135	Potri.001G029600.1	0.13466	2.31319	0.0582141	Negative selection
189	Lus10029693	Potri.002G080900.1	0.482164	NaN	NaN	NaN
190	Lus10035335	Potri.002G224200.1	0.266748	NaN	NaN	NaN
191	Lus10032290	Potri.003G130900.1	0.204459	NaN	NaN	NaN
192	Lus10032382	Potri.003G139900.1	0.452607	NaN	NaN	NaN
193	Lus10032418	Potri.003G142600.1	0.333243	1.6735	0.199129	Negative selection
194	Lus10024124	Potri.003G192700.1	0.304502	1.68506	0.180707	Negative selection
195	Lus10029582	Potri.003G123300.2	0.11772	1.50093	0.0784315	Negative selection
196	Lus10032270	Potri.003G129900.2	0.32727	1.12764	0.290227	Negative selection
197	Lus10028443	Potri.005G111100.7	0.214508	1.39278	0.154014	Negative selection
198	Lus10000333	Potri.005G036800.1	0.304858	1.96409	0.155216	Negative selection
199	Lus10029886	Potri.005G024700.1	0.196971	1.53049	0.128698	Negative selection
200	Lus10029693	Potri.005G180300.1	0.464082	1.7077	0.271758	Negative selection
201	Lus10028454	Potri.005G113200.1	0.709089	NaN	NaN	NaN
202	Lus10028406	Potri.005G108200.1	0.0675162	1.68847	0.0399867	Negative selection
203	Lus10028454	Potri.007G057300.1	0.646668	NaN	NaN	NaN
204	Lus10028406	Potri.007G061400.3	0.0737211	1.62405	0.0453934	Negative selection
205	Lus10021197	Potri.008G165900.1	0.285269	NaN	NaN	NaN
206	Lus10039607	Potri.009G060800.7	0.0827255	0.985011	0.0839844	Negative selection
207	Lus10021197	Potri.010G072700.1	0.253263	NaN	NaN	NaN
208	Lus10034832	Potri.010G252900.1	0.0999537	0.791994	0.126205	Negative selection
209	Lus10008283	Potri.011G150800.1	0.677809	NaN	NaN	NaN
210	Lus10008286	Potri.011G149200.3	0.288458	1.28008	0.225344	Negative selection
211	Lus10018589	Potri.013G132300.2	0.43467	NaN	NaN	NaN
212	Lus10000333	Potri.013G025800.1	0.325373	2.5392	0.12814	Negative selection
213	Lus10029886	Potri.013G015600.1	0.199696	1.82243	0.109576	Negative selection
214	Lus10035332	Potri.014G159300.5	0.0932305	1.36692	0.0682046	Negative selection
215	Lus10035335	Potri.014G158900.2	0.264137	NaN	NaN	NaN
216	Lus10002282	Potri.017G122300.6	0.281518	2.04774	0.137477	Negative selection
217	Lus10018589	Potri.019G100800.8	0.434127	NaN	NaN	NaN
218	Lus10019839	Potri.001G304100.1	0.133576	1.22675	0.108886	Negative selection
219	Lus10017253	Potri.002G017400.1	0.256575	NaN	NaN	NaN
220	Lus10015152	Potri.002G224200.1	0.302996	1.9584	0.154716	Negative selection
221	Lus10016040	Potri.002G006400.1	0.238986	1.51877	0.157355	Negative selection
222	Lus10034088	Potri.004G106000.1	0.456383	1.40085	0.325791	Negative selection
223	Lus10014366	Potri.004G143900.1	0.48271	2.10487	0.22933	Negative selection
224	Lus10019790	Potri.004G175500.1	0.280565	NaN	NaN	NaN
225	Lus10016040	Potri.005G255200.1	0.200698	1.91165	0.104987	Negative selection
226	Lus10017253	Potri.005G244500.1	0.249221	NaN	NaN	NaN
227	Lus10021245	Potri.006G200200.2	0.240055	1.38831	0.172912	Negative selection
228	Lus10000023	Potri.006G087800.1	0.256178	NaN	NaN	NaN
229	Lus10004162	Potri.006G193600.1	0.232228	1.72954	0.134272	Negative selection
230	Lus10015986	Potri.006G198600.2	0.192209	2.6669	0.0720719	Negative selection
231	Lus10001683	Potri.006G190500.6	0.311321	1.02273	0.304402	Negative selection
232	Lus10001685	Potri.006G190300.2	0.365663	1.60339	0.228056	Negative selection
233	Lus10007703	Potri.006G180600.2	0.670986	NaN	NaN	NaN
234	Lus10017197	Potri.006G094000.1	0.211725	2.10317	0.100669	Negative selection
235	Lus10017764	Potri.006G154800.1	0.151413	2.04237	0.0741359	Negative selection
236	Lus10013821	Potri.006G122800.4	0.304232	1.48558	0.204791	Negative selection
237	Lus10019839	Potri.009G099400.4	0.116776	1.14895	0.101637	Negative selection
238	Lus10019790	Potri.009G135400.2	0.280622	NaN	NaN	NaN
239	Lus10000023	Potri.010G201300.1	0.434391	NaN	NaN	NaN
240	Lus10032471	Potri.012G060100.1	0.102479	1.19296	0.0859034	Negative selection
241	Lus10033725	Potri.013G147600.2	0.0904994	1.32302	0.0684034	Negative selection
242	Lus10033697	Potri.013G132300.2	0.426469	NaN	NaN	NaN
243	Lus10006378	Potri.014G165400.1	0.0765869	1.02544	0.0746868	Negative selection
244	Lus10015152	Potri.014G158900.2	0.237832	3.25876	0.0729825	Negative selection
245	Lus10032471	Potri.015G050300.1	0.0980967	1.01781	0.09638	Negative selection
246	Lus10021245	Potri.016G066400.5	0.229255	1.08415	0.211461	Negative selection
247	Lus10015986	Potri.016G064600.1	0.184	2.44718	0.0751886	Negative selection
248	Lus10004162	Potri.016G058300.1	0.24257	1.6444	0.147512	Negative selection
249	Lus10025228	Potri.016G136200.1	0.605274	NaN	NaN	NaN
250	Lus10017197	Potri.016G105900.2	0.218348	1.42793	0.152912	Negative selection
251	Lus10001683	Potri.018G114700.8	0.31556	0.960258	0.32862	Negative selection
252	Lus10001685	Potri.018G114500.5	0.374201	1.6259	0.23015	Negative selection
253	Lus10017764	Potri.018G073400.2	0.151076	1.52191	0.0992672	Negative selection
254	Lus10017750	Potri.018G034400.2	0.548579	1.6933	0.32397	Negative selection
255	Lus10033697	Potri.019G100800.8	0.37801	NaN	NaN	NaN
256	Lus10035368	Potri.001G140900.1	0.519542	NaN	NaN	NaN
257	Lus10028773	Potri.001G101000.2	0.253061	3.21714	0.0786603	Negative selection
258	Lus10035368	Potri.003G093500.1	0.463816	NaN	NaN	NaN
259	Lus10028773	Potri.003G130900.1	0.288715	NaN	NaN	NaN
260	Lus10028790	Potri.004G161100.3	0.111999	1.1218	0.0998392	Negative selection
261	Lus10020084	Potri.004G032700.4	0.26948	1.26282	0.213396	Negative selection
262	Lus10017383	Potri.005G090500.9	0.263548	1.64792	0.159928	Negative selection
263	Lus10017385	Potri.005G090800.1	0.286276	1.0932	0.261869	Negative selection
264	Lus10009511	Potri.006G239500.1	0.451732	1.83326	0.246408	Negative selection
265	Lus10023182	Potri.006G128700.1	0.139986	1.38379	0.101162	Negative selection
266	Lus10015506	Potri.006G175700.2	0.32128	NaN	NaN	NaN
267	Lus10015503	Potri.006G176600.1	0.154404	1.38021	0.11187	Negative selection
268	Lus10015502	Potri.006G176700.1	0.316555	NaN	NaN	NaN
269	Lus10012198	Potri.006G052600.1	0.0733041	1.10606	0.0662752	Negative selection
270	Lus10003992	Potri.006G216200.1	0.336077	1.45473	0.231024	Negative selection
271	Lus10017385	Potri.007G073200.2	0.281878	1.06899	0.263686	Negative selection
272	Lus10023527	Potri.008G038450.1	0.113942	1.45633	0.0782395	Negative selection
273	Lus10023507	Potri.008G041201.1	0.415305	0.90597	0.458409	Negative selection
274	Lus10040278	Potri.008G058100.2	0.198496	NaN	NaN	NaN
275	Lus10040240	Potri.008G062600.1	0.427909	1.57849	0.271087	Negative selection
276	Lus10028827	Potri.008G030100.3	0.134001	1.16808	0.114719	Negative selection
277	Lus10001568	Potri.009G034700.7	0.0960564	0.973609	0.0986601	Negative selection
278	Lus10028790	Potri.009G122100.3	0.105458	1.13946	0.0925504	Negative selection
279	Lus10040278	Potri.010G201300.1	0.18875	NaN	NaN	NaN
280	Lus10040240	Potri.010G195100.1	0.409528	1.63813	0.249997	Negative selection
281	Lus10023527	Potri.010G223766.1	0.126599	1.4005	0.0903954	Negative selection
282	Lus10023507	Potri.010G220700.1	0.373651	0.847856	0.440701	Negative selection
283	Lus10028827	Potri.010G231100.4	0.137846	1.04439	0.131988	Negative selection
284	Lus10025394	Potri.011G068800.1	0.437792	NaN	NaN	NaN
285	Lus10020084	Potri.011G041400.1	0.283389	1.31913	0.21483	Negative selection
286	Lus10038341	Potri.012G119000.1	0.158046	1.53112	0.103223	Negative selection
287	Lus10023182	Potri.016G089000.2	0.255562	1.30496	0.195838	Negative selection
288	Lus10003992	Potri.016G082500.1	0.330875	1.4977	0.220922	Negative selection
289	Lus10012198	Potri.016G054900.4	0.0699963	1.23672	0.0565984	Negative selection
290	Lus10015506	Potri.018G098000.1	0.350345	1.61044	0.217546	Negative selection
291	Lus10015503	Potri.018G098400.4	0.151625	1.39571	0.108636	Negative selection
292	Lus10015502	Potri.018G098500.1	0.314828	NaN	NaN	NaN
293	Lus10009511	Potri.018G042501.1	0.453101	2.03104	0.223088	Negative selection
294	Lus10002131	Potri.001G294200.1	0.101691	0.774011	0.131381	Negative selection
295	Lus10002113	Potri.001G297000.1	0.261346	1.19397	0.218889	Negative selection
296	Lus10024635	Potri.001G101700.6	0.223878	1.04636	0.21396	Negative selection
297	Lus10004568	Potri.001G139400.2	0.423916	1.29521	0.327294	Negative selection
298	Lus10022294	Potri.001G342200.3	0.123805	1.01366	0.122138	Negative selection
299	Lus10024657	Potri.001G101000.2	0.186608	NaN	NaN	NaN
300	Lus10004557	Potri.001G144200.1	0.185591	1.17087	0.158507	Negative selection
301	Lus10000908	Potri.001G139400.2	0.301989	1.60438	0.188228	Negative selection
302	Lus10005617	Potri.002G017400.1	0.259839	NaN	NaN	NaN
303	Lus10024657	Potri.003G130900.1	0.202954	NaN	NaN	NaN
304	Lus10004557	Potri.003G090000.3	0.160088	1.26	0.127053	Negative selection
305	Lus10004572	Potri.003G093500.1	0.466639	NaN	NaN	NaN
306	Lus10000899	Potri.003G090000.3	0.159924	1.25263	0.127671	Negative selection
307	Lus10023671	Potri.003G176500.4	0.43672	0.950542	0.459443	Negative selection
308	Lus10024635	Potri.003G129900.2	0.265355	1.09773	0.24173	Negative selection
309	Lus10018409	Potri.004G026800.1	0.12543	NaN	NaN	NaN
310	Lus10018465	Potri.004G037700.4	0.397255	1.23012	0.32294	Negative selection
311	Lus10018489	Potri.004G042700.2	0.274249	2.04876	0.133861	Negative selection
312	Lus10014118	Potri.004G175500.1	0.296139	NaN	NaN	NaN
313	Lus10025162	Potri.005G255200.1	0.242175	1.51141	0.16023	Negative selection
314	Lus10005617	Potri.005G244500.1	0.277681	NaN	NaN	NaN
315	Lus10026501	Potri.006G129000.2	0.324284	1.43976	0.225235	Negative selection
316	Lus10021113	Potri.006G094000.1	0.288838	1.56728	0.184293	Negative selection
317	Lus10021063	Potri.006G193600.1	0.214472	1.64166	0.130643	Negative selection
318	Lus10004821	Potri.006G099600.1	0.109702	2.04115	0.0537451	Negative selection
319	Lus10002487	Potri.006G100400.1	0.327092	1.24136	0.263495	Negative selection
320	Lus10023914	Potri.006G121801.1	0.145408	1.57902	0.0920875	Negative selection
321	Lus10013606	Potri.006G200200.2	0.233241	1.33888	0.174206	Negative selection
322	Lus10010513	Potri.008G149300.1	0.432894	1.26249	0.34289	Negative selection
323	Lus10033985	Potri.008G196400.10	0.256435	1.17608	0.218042	Negative selection
324	Lus10034030	Potri.008G202700.1	0.229321	1.29119	0.177604	Negative selection
325	Lus10033969	Potri.008G205400.1	0.0929281	1.58719	0.0585487	Negative selection
326	Lus10002131	Potri.009G089100.1	0.105691	0.819117	0.129031	Negative selection
327	Lus10002113	Potri.009G091200.1	0.252973	1.2005	0.210722	Negative selection
328	Lus10014118	Potri.009G135400.2	0.283718	NaN	NaN	NaN
329	Lus10010513	Potri.010G092300.1	0.407391	1.18507	0.343769	Negative selection
330	Lus10018489	Potri.011G051800.2	0.256985	1.81289	0.141754	Negative selection
331	Lus10018465	Potri.011G046400.1	0.415831	1.30576	0.318459	Negative selection
332	Lus10018409	Potri.011G040000.1	0.109567	NaN	NaN	NaN
333	Lus10003400	Potri.012G011500.2	0.310758	NaN	NaN	NaN
334	Lus10012332	Potri.014G165400.1	0.0801173	1.02612	0.0780776	Negative selection
335	Lus10003400	Potri.015G017800.1	0.367652	NaN	NaN	NaN
336	Lus10004821	Potri.016G115300.1	0.112033	2.05329	0.0545628	Negative selection
337	Lus10002487	Potri.016G116300.4	0.312619	1.27792	0.24463	Negative selection
338	Lus10021113	Potri.016G105900.2	0.282498	1.31839	0.214275	Negative selection
339	Lus10021063	Potri.016G058300.1	0.23535	1.51029	0.155831	Negative selection
340	Lus10013606	Potri.016G066400.5	0.215554	1.05694	0.203942	Negative selection
341	Lus10030972	Potri.001G140900.1	0.516358	NaN	NaN	NaN
342	Lus10000533	Potri.001G168700.1	0.25698	1.18152	0.217501	Negative selection
343	Lus10024810	Potri.002G124300.2	0.24303	0.933306	0.260397	Negative selection
344	Lus10024881	Potri.002G039700.1	0.454915	2.78996	0.163054	Negative selection
345	Lus10017510	Potri.003G130900.1	0.287746	NaN	NaN	NaN
346	Lus10010179	Potri.005G090500.9	0.280927	2.60062	0.108023	Negative selection
347	Lus10010182	Potri.005G090800.1	0.271752	1.29073	0.210542	Negative selection
348	Lus10021993	Potri.005G054400.1	0.400113	1.11435	0.359057	Negative selection
349	Lus10007538	Potri.006G052600.1	0.0737029	1.04511	0.0705215	Negative selection
350	Lus10011702	Potri.006G239500.1	0.413267	1.69547	0.243748	Negative selection
351	Lus10010179	Potri.007G074014.1	0.259205	2.27415	0.113979	Negative selection
352	Lus10010182	Potri.007G073200.2	0.288127	1.24123	0.23213	Negative selection
353	Lus10040413	Potri.008G038450.1	0.12597	1.45326	0.0866815	Negative selection
354	Lus10040389	Potri.008G041201.1	0.39755	0.840443	0.473024	Negative selection
355	Lus10004712	Potri.008G058100.2	0.206964	NaN	NaN	NaN
356	Lus10028249	Potri.008G062600.1	0.397395	1.65978	0.239427	Negative selection
357	Lus10017455	Potri.008G030100.3	0.146746	1.13299	0.129521	Negative selection
358	Lus10040508	Potri.009G111200.3	0.214044	0.973712	0.219823	Negative selection
359	Lus10008972	Potri.010G243200.1	0.564147	NaN	NaN	NaN
360	Lus10004712	Potri.010G201300.1	0.234949	NaN	NaN	NaN
361	Lus10028249	Potri.010G195100.1	0.403939	1.51317	0.266948	Negative selection
362	Lus10040413	Potri.010G223766.1	0.138345	1.42185	0.0972996	Negative selection
363	Lus10040389	Potri.010G220700.1	0.363394	0.819313	0.443534	Negative selection
364	Lus10002637	Potri.013G060500.3	0.427774	5.91822	0.0722809	Negative selection
365	Lus10002639	Potri.013G060900.1	0.24056	1.87868	0.128047	Negative selection
366	Lus10021993	Potri.013G042000.1	0.364148	1.35056	0.269627	Negative selection
367	Lus10007538	Potri.016G054900.4	0.0702979	1.22418	0.0574247	Negative selection
368	Lus10011702	Potri.018G042501.1	0.45564	1.78793	0.254841	Negative selection
369	Lus10002637	Potri.019G032500.3	0.392892	3.7503	0.104763	Negative selection
370	Lus10002639	Potri.019G032300.5	0.241062	1.90221	0.126727	Negative selection
371	Lus10031728	Potri.001G124000.1	0.137542	1.0958	0.125517	Negative selection
372	Lus10022774	Potri.002G245500.3	0.374365	2.83046	0.132263	Negative selection
373	Lus10000710	Potri.002G039700.1	0.46962	1.9637	0.23915	Negative selection
374	Lus10022895	Potri.002G259000.2	0.375999	1.17491	0.320024	Negative selection
375	Lus10042890	Potri.002G141300.3	0.200149	1.25501	0.15948	Negative selection
376	Lus10031728	Potri.003G109400.6	0.148022	1.11754	0.132454	Negative selection
377	Lus10015080	Potri.006G128700.1	0.127267	1.41896	0.0896902	Negative selection
378	Lus10031780	Potri.011G142700.1	0.221254	2.83877	0.0779401	Negative selection
379	Lus10027441	Potri.012G139100.1	0.139391	1.16709	0.119434	Negative selection
380	Lus10020258	Potri.013G060500.3	0.438493	NaN	NaN	NaN
381	Lus10020256	Potri.013G060900.1	0.253263	2.61502	0.0968491	Negative selection
382	Lus10001131	Potri.014G027000.1	0.180146	1.28924	0.13973	Negative selection
383	Lus10042890	Potri.014G055800.2	0.20589	1.27472	0.161518	Negative selection
384	Lus10027441	Potri.015G141400.1	0.132945	1.23384	0.107749	Negative selection
385	Lus10015046	Potri.016G082500.1	0.358585	1.31654	0.272369	Negative selection
386	Lus10015080	Potri.016G089000.2	0.187307	1.62577	0.115212	Negative selection
387	Lus10020258	Potri.019G032500.3	0.408292	NaN	NaN	NaN
388	Lus10020256	Potri.019G032300.5	0.263621	2.19182	0.120275	Negative selection
389	Lus10031152	Potri.001G124000.1	0.136732	1.0573	0.129322	Negative selection
390	Lus10038169	Potri.002G241900.8	0.480004	2.04603	0.234603	Negative selection
391	Lus10038180	Potri.002G243800.1	0.41287	4.26766	0.0967439	Negative selection
392	Lus10036404	Potri.002G165200.1	0.27169	NaN	NaN	NaN
393	Lus10036378	Potri.002G161900.1	0.227114	NaN	NaN	NaN
394	Lus10036569	Potri.002G155200.1	0.282717	1.38544	0.204063	Negative selection
395	Lus10025031	Potri.002G196600.1	0.363895	1.6803	0.216566	Negative selection
396	Lus10013739	Potri.003G215400.2	0.109141	1.14543	0.0952844	Negative selection
397	Lus10031152	Potri.003G109400.6	0.149443	1.05641	0.141463	Negative selection
398	Lus10041970	Potri.004G158400.6	0.239324	1.57683	0.151775	Negative selection
399	Lus10016796	Potri.005G127900.2	0.179232	2.15798	0.0830555	Negative selection
400	Lus10036466	Potri.005G160900.1	0.520339	2.59404	0.20059	Negative selection
401	Lus10026226	Potri.006G274700.3	0.351896	1.44599	0.243359	Negative selection
402	Lus10016817	Potri.007G081900.1	0.155246	1.04639	0.148363	Negative selection
403	Lus10016796	Potri.007G031600.1	0.17449	1.90271	0.091706	Negative selection
404	Lus10026380	Potri.009G073800.1	0.11856	1.10298	0.107491	Negative selection
405	Lus10041970	Potri.009G120000.2	0.249855	1.39006	0.179744	Negative selection
406	Lus10031202	Potri.011G142700.1	0.232616	NaN	NaN	NaN
407	Lus10002369	Potri.012G079600.2	0.189759	1.44934	0.130928	Negative selection
408	Lus10005754	Potri.012G139100.1	0.108647	1.08604	0.10004	Negative selection
409	Lus10005754	Potri.012G139100.1	0.108647	1.08604	0.10004	Negative selection
410	Lus10019018	Potri.012G011500.2	0.379211	NaN	NaN	NaN
411	Lus10004246	Potri.012G074500.1	0.288575	1.84435	0.156465	Negative selection
412	Lus10036569	Potri.014G075000.4	0.284128	1.35684	0.209404	Negative selection
413	Lus10036404	Potri.014G091000.1	0.306861	NaN	NaN	NaN
414	Lus10036378	Potri.014G087700.1	0.201774	2.71968	0.0741903	Negative selection
415	Lus10025031	Potri.014G121900.1	0.318438	1.49679	0.212746	Negative selection
416	Lus10019018	Potri.015G017800.1	0.372003	NaN	NaN	NaN
417	Lus10002369	Potri.015G074900.1	0.19715	1.59352	0.12372	Negative selection
418	Lus10042188	Potri.015G066600.7	0.170216	1.70049	0.100098	Negative selection
419	Lus10005754	Potri.015G141400.1	0.109599	1.2458	0.0879746	Negative selection
420	Lus10004246	Potri.015G069400.1	0.311079	2.00158	0.155417	Negative selection
421	Lus10012975	Potri.018G085001.1	0.335644	NaN	NaN	NaN
422	Lus10026420	Potri.019G126000.2	0.270838	1.04532	0.259096	Negative selection
423	Lus10016561	Potri.001G238800.1	0.11391	1.16626	0.0976717	Negative selection
424	Lus10016451	Potri.001G246700.1	0.187585	1.36046	0.137884	Negative selection
425	Lus10001209	Potri.001G250800.1	0.171973	1.66427	0.103333	Negative selection
426	Lus10027921	Potri.004G143900.1	0.350215	1.56756	0.223414	Negative selection
427	Lus10006741	Potri.004G032700.4	0.257477	1.11099	0.231754	Negative selection
428	Lus10020033	Potri.004G006200.2	0.301488	1.60049	0.188373	Negative selection
429	Lus10043365	Potri.004G189400.2	0.169562	1.007	0.168383	Negative selection
430	Lus10031491	Potri.005G024700.1	0.322204	1.94151	0.165955	Negative selection
431	Lus10031468	Potri.005G021000.3	0.366354	2.66254	0.137596	Negative selection
432	Lus10031515	Potri.005G036800.1	0.317413	NaN	NaN	NaN
433	Lus10033053	Potri.006G154800.1	0.1141	1.50308	0.0759111	Negative selection
434	Lus10019973	Potri.006G176700.1	0.305701	NaN	NaN	NaN
435	Lus10019974	Potri.006G176600.1	0.138941	1.29135	0.107594	Negative selection
436	Lus10019979	Potri.006G175700.2	0.354436	NaN	NaN	NaN
437	Lus10012791	Potri.008G196400.10	0.253853	1.21242	0.209377	Negative selection
438	Lus10004419	Potri.008G202700.1	0.22717	1.3626	0.166718	Negative selection
439	Lus10006493	Potri.008G219200.1	0.349274	2.15108	0.162371	Negative selection
440	Lus10034157	Potri.008G025300.1	0.24699	1.66769	0.148103	Negative selection
441	Lus10012811	Potri.008G205400.1	0.072634	1.53322	0.0473734	Negative selection
442	Lus10016561	Potri.009G030000.1	0.106319	1.28009	0.0830562	Negative selection
443	Lus10016451	Potri.009G039700.1	0.200019	1.26312	0.158353	Negative selection
444	Lus10004977	Potri.009G034700.7	0.0924114	0.916373	0.100845	Negative selection
445	Lus10001209	Potri.009G045400.1	0.151193	1.72251	0.0877744	Negative selection
446	Lus10006493	Potri.010G010500.1	0.371536	2.44296	0.152084	Negative selection
447	Lus10034153	Potri.010G243200.1	0.636519	NaN	NaN	NaN
448	Lus10006741	Potri.011G041400.1	0.263147	1.15292	0.228244	Negative selection
449	Lus10015273	Potri.011G068800.1	0.498289	2.51796	0.197894	Negative selection
450	Lus10020033	Potri.011G009700.4	0.33288	1.45135	0.229359	Negative selection
451	Lus10018294	Potri.012G119200.1	0.25631	2.39832	0.106871	Negative selection
452	Lus10036202	Potri.012G119000.1	0.150756	1.3007	0.115903	Negative selection
453	Lus10042969	Potri.012G060100.1	0.106308	1.16164	0.0915149	Negative selection
454	Lus10031618	Potri.013G147600.2	0.0863004	1.2594	0.0685252	Negative selection
455	Lus10031491	Potri.013G015600.1	0.322533	2.78912	0.11564	Negative selection
456	Lus10031468	Potri.013G011400.8	0.357124	2.75767	0.129502	Negative selection
457	Lus10031515	Potri.013G025800.1	0.359356	4.97884	0.0721766	Negative selection
458	Lus10018293	Potri.015G117600.1	0.21555	1.46122	0.147513	Negative selection
459	Lus10018294	Potri.015G118000.1	0.267319	2.51332	0.106361	Negative selection
460	Lus10042969	Potri.015G050300.1	0.101922	1.04199	0.0978153	Negative selection
461	Lus10033053	Potri.018G073400.2	0.111443	1.45017	0.0768483	Negative selection
462	Lus10034953	Potri.018G085001.1	0.335772	NaN	NaN	NaN
463	Lus10033075	Potri.018G034400.2	0.524557	2.17497	0.241179	Negative selection
464	Lus10019973	Potri.018G098500.1	0.323039	NaN	NaN	NaN
465	Lus10019974	Potri.018G098400.4	0.132956	1.2389	0.107317	Negative selection
466	Lus10019979	Potri.018G098000.1	0.356468	2.71211	0.131436	Negative selection
467	Lus10019703	Potri.001G267700.4	0.177194	1.58798	0.111585	Negative selection
468	Lus10000412	Potri.001G037200.1	0.292668	NaN	NaN	NaN
469	Lus10032119	Potri.001G336832.1	0.309464	1.54273	0.200596	Negative selection
470	Lus10002761	Potri.001G026200.1	0.108642	1.50771	0.0720577	Negative selection
471	Lus10006785	Potri.001G309600.1	0.284257	NaN	NaN	NaN
472	Lus10030728	Potri.002G006400.1	0.242315	1.74971	0.138489	Negative selection
473	Lus10025691	Potri.002G080900.1	0.473967	NaN	NaN	NaN
474	Lus10025671	Potri.002G083001.1	0.379844	NaN	NaN	NaN
475	Lus10010791	Potri.002G133000.1	0.0691925	0.990336	0.0698677	Negative selection
476	Lus10034551	Potri.002G017400.1	0.347602	NaN	NaN	NaN
477	Lus10025612	Potri.002G085800.1	0.404617	3.14672	0.128584	Negative selection
478	Lus10002761	Potri.003G198600.1	0.0691425	1.35488	0.0510324	Negative selection
479	Lus10005220	Potri.004G125400.5	0.176285	1.08961	0.161788	Negative selection
480	Lus10034551	Potri.005G244500.1	0.309279	NaN	NaN	NaN
481	Lus10030728	Potri.005G255200.1	0.223343	2.0251	0.110287	Negative selection
482	Lus10025691	Potri.005G180300.1	0.527289	NaN	NaN	NaN
483	Lus10019687	Potri.005G081500.3	0.0575089	1.19513	0.0481192	Negative selection
484	Lus10008046	Potri.006G063100.2	0.410533	1.39267	0.29478	Negative selection
485	Lus10026941	Potri.006G274700.3	0.341478	1.33908	0.25501	Negative selection
486	Lus10019687	Potri.007G085900.1	0.0607712	1.05587	0.0575556	Negative selection
487	Lus10030472	Potri.008G086300.2	0.298634	1.83514	0.162731	Negative selection
488	Lus10030464	Potri.008G087200.1	0.343047	4.07111	0.0842638	Negative selection
489	Lus10034640	Potri.008G127400.8	0.229023	1.32066	0.173415	Negative selection
490	Lus10035057	Potri.008G116400.1	0.156032	1.09885	0.141996	Negative selection
491	Lus10011416	Potri.008G185800.1	0.415855	1.41071	0.294783	Negative selection
492	Lus10011405	Potri.008G183600.3	0.184446	NaN	NaN	NaN
493	Lus10011391	Potri.008G181300.1	0.200479	1.598	0.125456	Negative selection
494	Lus10026856	Potri.008G077100.1	0.0619078	1.00669	0.0614966	Negative selection
495	Lus10019703	Potri.009G062100.2	0.185641	1.55598	0.119308	Negative selection
496	Lus10011416	Potri.010G047100.1	0.340954	1.72359	0.197817	Negative selection
497	Lus10011405	Potri.010G049600.3	0.19714	2.57562	0.0765407	Negative selection
498	Lus10011390	Potri.010G053000.6	0.145197	1.74942	0.0829972	Negative selection
499	Lus10030891	Potri.010G042200.1	0.166204	1.75502	0.0947019	Negative selection
500	Lus10034587	Potri.010G106300.1	0.182257	1.53882	0.118439	Negative selection
501	Lus10026856	Potri.010G180600.1	0.0559132	0.990833	0.0564305	Negative selection
502	Lus10030472	Potri.010G169200.1	0.29582	1.41984	0.208347	Negative selection
503	Lus10030464	Potri.010G168300.1	0.308732	NaN	NaN	NaN
504	Lus10026648	Potri.010G161100.3	0.334735	1.51277	0.221273	Negative selection
505	Lus10034640	Potri.010G115600.3	0.207188	1.35042	0.153425	Negative selection
506	Lus10035057	Potri.010G129932.1	0.357587	0.989533	0.36137	Negative selection
507	Lus10010791	Potri.014G040400.1	0.0811743	0.98795	0.0821643	Negative selection
508	Lus10035057	Potri.015G050300.1	0.196519	2.27179	0.0865042	Negative selection
509	Lus10005220	Potri.017G090000.1	0.158746	0.983605	0.161392	Negative selection
510	Lus10008046	Potri.018G119600.1	0.370892	1.62619	0.228074	Negative selection
511	Lus10006651	Potri.018G128100.1	0.16755	1.0922	0.153406	Negative selection
512	Lus10026941	Potri.018G005600.2	0.329714	1.21603	0.271139	Negative selection
513	Lus10030512	Potri.019G060900.1	0.23773	1.15511	0.205808	Negative selection
514	Lus10013374	Potri.001G213800.7	0.220616	1.21389	0.181743	Negative selection
515	Lus10039202	Potri.001G010500.1	0.137081	1.20664	0.113606	Negative selection
516	Lus10021403	Potri.004G217700.2	0.26316	1.6525	0.15925	Negative selection
517	Lus10022492	Potri.005G127900.2	0.181404	1.82337	0.0994884	Negative selection
518	Lus10003261	Potri.005G054400.1	0.344874	1.14316	0.301685	Negative selection
519	Lus10013144	Potri.006G247000.1	0.18053	1.31314	0.137479	Negative selection
520	Lus10039001	Potri.006G035700.1	0.248152	1.98618	0.12494	Negative selection
521	Lus10035857	Potri.007G081900.1	0.148459	1.00748	0.147356	Negative selection
522	Lus10025566	Potri.007G126900.1	0.117614	1.17029	0.1005	Negative selection
523	Lus10022492	Potri.007G031600.1	0.17174	1.5446	0.111187	Negative selection
524	Lus10021403	Potri.009G003500.4	0.272301	1.50193	0.181301	Negative selection
525	Lus10021458	Potri.009G010350.1	0.259351	2.39653	0.108219	Negative selection
526	Lus10021482	Potri.009G013300.1	0.223083	1.12825	0.197725	Negative selection
527	Lus10017978	Potri.009G120000.2	0.248772	1.48628	0.167379	Negative selection
528	Lus10017969	Potri.009G122100.3	0.116969	1.10897	0.105475	Negative selection
529	Lus10042156	Potri.012G074500.1	0.266364	1.87917	0.141746	Negative selection
530	Lus10042126	Potri.012G079600.2	0.235144	1.15335	0.203879	Negative selection
531	Lus10022405	Potri.012G015500.1	0.0667713	3.67226	0.0181826	Negative selection
532	Lus10003261	Potri.013G042000.1	0.334748	1.14239	0.293023	Negative selection
533	Lus10008163	Potri.014G138000.1	0.0780588	1.2507	0.0624119	Negative selection
534	Lus10042156	Potri.015G069400.1	0.298488	2.0351	0.14667	Negative selection
535	Lus10042126	Potri.015G074900.1	0.24191	1.17022	0.206722	Negative selection
536	Lus10022405	Potri.015G013000.1	0.0734518	1.8648	0.0393885	Negative selection
537	Lus10039001	Potri.016G033600.1	0.39044	2.0013	0.195093	Negative selection
538	Lus10025566	Potri.017G032000.1	0.114785	1.18862	0.0965698	Negative selection
539	Lus10013144	Potri.018G034400.2	0.185521	1.37186	0.135233	Negative selection
540	Lus10009438	Potri.019G082500.1	0.270453	1.67198	0.161756	Negative selection
541	Lus10022567	Potri.001G371200.4	0.220493	1.38786	0.158874	Negative selection
542	Lus10004001	Potri.002G171500.1	0.0837656	2.855	0.02934	Negative selection
543	Lus10041359	Potri.002G155200.1	0.280728	1.56749	0.179094	Negative selection
544	Lus10010011	Potri.002G196600.1	0.3411	2.02312	0.168601	Negative selection
545	Lus10005127	Potri.002G164000.2	0.451503	1.41284	0.319572	Negative selection
546	Lus10011184	Potri.004G042700.2	0.294025	1.79079	0.164187	Negative selection
547	Lus10007293	Potri.004G059200.2	0.387967	1.33551	0.2905	Negative selection
548	Lus10007296	Potri.004G059600.2	0.0728325	1.4973	0.0486426	Negative selection
549	Lus10012745	Potri.005G071300.1	0.478807	NaN	NaN	NaN
550	Lus10023162	Potri.005G071500.1	0.266821	1.29478	0.206074	Negative selection
551	Lus10029292	Potri.006G193600.1	0.214767	1.58559	0.135449	Negative selection
552	Lus10012745	Potri.007G097500.6	0.477238	NaN	NaN	NaN
553	Lus10005954	Potri.008G054200.1	0.341487	NaN	NaN	NaN
554	Lus10040942	Potri.008G071000.1	0.467411	1.62801	0.287106	Negative selection
555	Lus10037928	Potri.008G030100.3	0.126977	1.05349	0.120531	Negative selection
556	Lus10041244	Potri.008G198300.4	0.187353	1.14849	0.16313	Negative selection
557	Lus10041301	Potri.009G013000.1	0.224129	1.26151	0.177667	Negative selection
558	Lus10041321	Potri.009G010350.1	0.294073	1.49697	0.196445	Negative selection
559	Lus10037928	Potri.010G231100.4	0.13342	0.945364	0.141131	Negative selection
560	Lus10041244	Potri.010G027900.8	0.198757	1.11626	0.178056	Negative selection
561	Lus10011184	Potri.011G051800.2	0.301463	1.64474	0.183289	Negative selection
562	Lus10007293	Potri.011G068800.1	0.379336	1.56828	0.24188	Negative selection
563	Lus10007296	Potri.011G069600.1	0.0756275	1.49503	0.050586	Negative selection
564	Lus10002584	Potri.011G040000.1	0.108691	NaN	NaN	NaN
565	Lus10041359	Potri.014G075000.4	0.254421	1.56581	0.162485	Negative selection
566	Lus10002679	Potri.014G105601.1	0.226329	1.22793	0.184317	Negative selection
567	Lus10004001	Potri.014G099200.1	0.0971665	2.32402	0.0418096	Negative selection
568	Lus10010011	Potri.014G121900.1	0.308901	1.61971	0.190714	Negative selection
569	Lus10005127	Potri.014G089800.4	0.357605	1.51415	0.236176	Negative selection
570	Lus10029292	Potri.016G058300.1	0.215096	1.78016	0.120829	Negative selection
571	Lus10029351	Potri.016G066400.5	0.236309	1.11331	0.212258	Negative selection
572	Lus10014823	Potri.019G082500.1	0.157457	0.979114	0.160816	Negative selection

## Sheet: Flax_Arabidopsis
Table S4. Orthologous relationships of RING finger genes between flax and other four plant species.
NO.	Flax RING ID	Arabidopsis RING ID	Ka	Ks	Ka/Ks	Selection pressure
1	Lus10029178	AT1G23980.1	0.346	2.20646	0.156812	Negative selection
2	Lus10006074	AT1G71980.1	0.275158	1.93321	0.142332	Negative selection
3	Lus10006074	AT1G22670.1	0.472341	4.66734	0.101201	Negative selection
4	Lus10035549	AT2G37950.1	0.519948	1.95247	0.266303	Negative selection
5	Lus10027744	AT2G37950.1	0.512712	1.74755	0.293388	Negative selection
6	Lus10027027	AT2G31510.1	0.197273	1.82019	0.108381	Negative selection
7	Lus10016163	AT2G27940.1	0.594701	2.10809	0.282104	Negative selection
8	Lus10010069	AT2G47090.1	0.391978	2.76369	0.141831	Negative selection
9	Lus10016255	AT2G42030.1	0.486017	NaN	NaN	NaN
10	Lus10036138	AT2G28540.2	0.524645	1.67114	0.313944	Negative selection
11	Lus10014749	AT2G30580.2	0.380028	2.16887	0.17522	Negative selection
12	Lus10016255	AT3G58030.4	0.369595	NaN	NaN	NaN
13	Lus10025921	AT3G07120.1	0.527797	NaN	NaN	NaN
14	Lus10025921	AT3G25030.4	0.580358	NaN	NaN	NaN
15	Lus10012033	AT3G18930.1	0.4263	2.78395	0.153128	Negative selection
16	Lus10025930	AT3G24800.1	0.528597	1.97175	0.268086	Negative selection
17	Lus10036128	AT3G45580.1	0.546566	2.72731	0.200405	Negative selection
18	Lus10018817	AT4G01245.1	0.523366	NaN	NaN	NaN
19	Lus10025921	AT4G13100.2	0.666228	NaN	NaN	NaN
20	Lus10022743	AT5G01880.1	0.372667	1.8075	0.206178	Negative selection
21	Lus10036034	AT5G12310.1	0.337708	2.1469	0.1573	Negative selection
22	Lus10022585	AT5G60580.4	0.274721	1.90859	0.143939	Negative selection
23	Lus10016102	AT5G60710.1	0.304614	NaN	NaN	NaN
24	Lus10009695	AT5G12310.1	0.349436	2.53665	0.137755	Negative selection
25	Lus10042443	AT5G10650.1	0.619875	1.73432	0.357416	Negative selection
26	Lus10042443	AT5G24870.3	0.584531	2.34526	0.24924	Negative selection
27	Lus10008447	AT5G22000.1	0.276143	1.4175	0.19481	Negative selection
28	Lus10016303	AT1G74990.1	0.362472	1.97009	0.183988	Negative selection
29	Lus10030599	AT1G10650.1	0.267632	NaN	NaN	NaN
30	Lus10016303	AT1G19310.1	0.211905	3.76955	0.0562148	Negative selection
31	Lus10012819	AT1G14200.1	0.471919	2.48748	0.189718	Negative selection
32	Lus10012826	AT1G14260.2	0.293136	1.85413	0.158099	Negative selection
33	Lus10004666	AT1G69330.1	0.391223	NaN	NaN	NaN
34	Lus10012819	AT1G26800.1	0.37113	1.31048	0.283202	Negative selection
35	Lus10013210	AT1G20823.1	0.311225	Infinity	0	Negative selection
36	Lus10013210	AT1G76410.1	0.310244	NaN	NaN	NaN
37	Lus10006448	AT1G24440.1	0.214813	1.48258	0.144891	Negative selection
38	Lus10012826	AT2G02960.5	0.407046	2.99949	0.135705	Negative selection
39	Lus10012819	AT2G03000.1	0.684858	3.27207	0.209304	Negative selection
40	Lus10012867	AT2G40770.1	0.289611	1.72331	0.168055	Negative selection
41	Lus10038048	AT2G47090.1	0.399169	NaN	NaN	NaN
42	Lus10038048	AT3G62240.1	0.345836	2.18143	0.158537	Negative selection
43	Lus10016416	AT3G63530.2	0.309952	2.05682	0.150695	Negative selection
44	Lus10038656	AT5G04460.1	0.253164	2.14258	0.118159	Negative selection
45	Lus10013618	AT5G17600.1	0.480925	1.49943	0.320738	Negative selection
46	Lus10014526	AT5G40250.1	0.236849	2.80166	0.084539	Negative selection
47	Lus10006253	AT1G24440.1	0.242238	NaN	NaN	NaN
48	Lus10013397	AT1G55530.2	0.350364	NaN	NaN	NaN
49	Lus10007936	AT1G15100.1	0.538506	NaN	NaN	NaN
50	Lus10037162	AT1G69520.2	0.469512	1.8607	0.252331	Negative selection
51	Lus10037170	AT1G14200.1	0.560995	1.90689	0.294193	Negative selection
52	Lus10037172	AT1G14260.2	0.285644	2.46502	0.115879	Negative selection
53	Lus10037170	AT1G26800.1	0.515494	1.39171	0.370404	Negative selection
54	Lus10006253	AT1G13195.1	0.272926	2.48953	0.10963	Negative selection
55	Lus10037170	AT2G03000.1	0.722504	NaN	NaN	NaN
56	Lus10040829	AT2G28840.1	0.177423	2.04771	0.0866447	Negative selection
57	Lus10012628	AT2G46495.1	0.544858	NaN	NaN	NaN
58	Lus10004521	AT2G47090.1	0.437409	2.29183	0.190856	Negative selection
59	Lus10005275	AT2G34000.1	0.674705	NaN	NaN	NaN
60	Lus10029242	AT2G34200.1	0.661267	1.49851	0.441282	Negative selection
61	Lus10040783	AT3G46620.1	0.376509	NaN	NaN	NaN
62	Lus10004521	AT3G62240.1	0.376738	2.14533	0.175608	Negative selection
63	Lus10023055	AT4G24015.1	0.336527	NaN	NaN	NaN
64	Lus10029245	AT4G18780.1	0.113922	2.34393	0.0486029	Negative selection
65	Lus10008106	AT4G32600.1	0.278925	1.52817	0.182522	Negative selection
66	Lus10023068	AT4G10930.1	0.450019	2.46229	0.182765	Negative selection
67	Lus10040616	AT4G19670.3	0.322059	2.95021	0.109165	Negative selection
68	Lus10040613	AT4G19700.1	0.367181	NaN	NaN	NaN
69	Lus10040716	AT5G59000.1	0.450335	1.89116	0.238126	Negative selection
70	Lus10037410	AT5G60580.4	0.296412	2.09171	0.141708	Negative selection
71	Lus10040613	AT5G45100.1	0.345424	NaN	NaN	NaN
72	Lus10040783	AT5G59550.2	0.426645	NaN	NaN	NaN
73	Lus10012987	AT1G23980.1	0.361624	2.41867	0.149513	Negative selection
74	Lus10030044	AT1G05120.2	0.312572	2.418	0.129269	Negative selection
75	Lus10039845	AT1G03770.2	0.459882	2.97689	0.154484	Negative selection
76	Lus10036937	AT1G24440.1	0.246254	NaN	NaN	NaN
77	Lus10036757	AT1G26800.1	0.517443	1.61363	0.320671	Negative selection
78	Lus10013027	AT1G60610.1	0.328647	NaN	NaN	NaN
79	Lus10036764	AT1G14180.1	0.650619	NaN	NaN	NaN
80	Lus10036754	AT1G14260.2	0.276433	2.36916	0.11668	Negative selection
81	Lus10013027	AT1G10650.1	0.275732	NaN	NaN	NaN
82	Lus10041859	AT2G17730.2	0.191715	1.80746	0.106069	Negative selection
83	Lus10003485	AT2G22680.1	0.417733	2.60118	0.160594	Negative selection
84	Lus10039848	AT2G20650.2	0.148718	NaN	NaN	NaN
85	Lus10029037	AT3G10910.1	0.380795	NaN	NaN	NaN
86	Lus10029940	AT3G05250.1	0.418104	3.0355	0.137738	Negative selection
87	Lus10020655	AT3G05545.1	0.400356	2.07711	0.192746	Negative selection
88	Lus10030248	AT3G61790.1	0.139242	NaN	NaN	NaN
89	Lus10041859	AT4G35840.2	0.148787	1.80907	0.0822449	Negative selection
90	Lus10041907	AT4G36050.2	0.310091	1.62333	0.191022	Negative selection
91	Lus10039821	AT4G28270.1	0.545525	4.87741	0.111847	Negative selection
92	Lus10039821	AT4G03510.1	0.602313	4.05873	0.148399	Negative selection
93	Lus10009810	AT4G01023.2	0.523956	2.66816	0.196374	Negative selection
94	Lus10003485	AT4G37890.1	0.416287	2.42689	0.171531	Negative selection
95	Lus10029993	AT4G22250.1	0.354874	2.1642	0.163975	Negative selection
96	Lus10041859	AT5G66070.2	0.144513	1.73185	0.0834441	Negative selection
97	Lus10003485	AT5G65683.1	0.439754	2.0106	0.218718	Negative selection
98	Lus10029037	AT5G05280.1	0.432165	NaN	NaN	NaN
99	Lus10004058	AT5G38070.1	0.420811	2.0622	0.204059	Negative selection
100	Lus10034367	AT5G38895.3	0.330453	1.26122	0.262011	Negative selection
101	Lus10039845	AT5G44280.2	0.493969	NaN	NaN	NaN
102	Lus10032290	AT1G63840.1	0.397452	NaN	NaN	NaN
103	Lus10018609	AT1G03770.2	0.455444	NaN	NaN	NaN
104	Lus10021197	AT1G04360.1	0.384219	3.06555	0.125335	Negative selection
105	Lus10029582	AT1G63170.1	0.210505	1.81502	0.115979	Negative selection
106	Lus10028406	AT2G17730.2	0.190502	2.08696	0.0912821	Negative selection
107	Lus10018613	AT2G20650.2	0.14247	4.3702	0.0326004	Negative selection
108	Lus10029886	AT2G47700.1	0.572242	NaN	NaN	NaN
109	Lus10000333	AT3G05200.1	0.462863	NaN	NaN	NaN
110	Lus10004467	AT3G05250.1	0.413666	2.19677	0.188306	Negative selection
111	Lus10029886	AT3G05545.1	0.42663	2.78669	0.153096	Negative selection
112	Lus10029582	AT4G11680.2	0.254519	NaN	NaN	NaN
113	Lus10032418	AT4G24015.1	0.304099	NaN	NaN	NaN
114	Lus10018589	AT4G28270.1	0.595735	NaN	NaN	NaN
115	Lus10018589	AT4G03510.1	0.566492	2.64403	0.214253	Negative selection
116	Lus10028406	AT4G35840.2	0.148787	2.25668	0.0659316	Negative selection
117	Lus10032402	AT4G10930.1	0.445088	2.38139	0.186902	Negative selection
118	Lus10032290	AT4G11360.1	0.507112	NaN	NaN	NaN
119	Lus10032290	AT5G41400.1	0.352929	NaN	NaN	NaN
120	Lus10021197	AT5G43420.1	0.378985	NaN	NaN	NaN
121	Lus10000333	AT5G27420.1	0.403015	NaN	NaN	NaN
122	Lus10039634	AT5G65683.1	0.438939	2.4237	0.181103	Negative selection
123	Lus10028406	AT5G66070.2	0.144513	1.95341	0.0739798	Negative selection
124	Lus10016040	AT1G20823.1	0.343217	2.02256	0.169694	Negative selection
125	Lus10016040	AT1G76410.1	0.306282	NaN	NaN	NaN
126	Lus10032471	AT1G73950.1	0.171162	1.87257	0.0914044	Negative selection
127	Lus10017197	AT2G37950.1	0.41493	NaN	NaN	NaN
128	Lus10006378	AT2G05170.1	0.130092	2.74888	0.0473253	Negative selection
129	Lus10019839	AT3G19370.3	0.602405	NaN	NaN	NaN
130	Lus10004162	AT3G58030.4	0.35863	NaN	NaN	NaN
131	Lus10019839	AT4G34100.1	0.159852	1.95293	0.0818528	Negative selection
132	Lus10033697	AT4G28270.1	0.593511	2.7608	0.214978	Negative selection
133	Lus10033697	AT4G03510.1	0.554563	NaN	NaN	NaN
134	Lus10019790	AT4G35070.1	0.465836	1.87677	0.248212	Negative selection
135	Lus10025228	AT5G01880.1	0.553876	1.25109	0.442713	Negative selection
136	Lus10017197	AT5G01070.1	0.465293	NaN	NaN	NaN
137	Lus10023527	AT2G38970.1	0.245439	3.02515	0.081133	Negative selection
138	Lus10040278	AT2G39720.1	0.351859	NaN	NaN	Negative selection
139	Lus10028790	AT2G21380.2	0.186602	2.71607	0.0687032	Negative selection
140	Lus10015502	AT2G18650.1	0.49742	NaN	NaN	NaN
141	Lus10015506	AT2G18670.1	0.452592	NaN	NaN	NaN
142	Lus10023527	AT3G54780.4	0.234954	2.24456	0.104677	Negative selection
143	Lus10023182	AT3G09770.1	0.218717	NaN	NaN	NaN
144	Lus10017385	AT3G19910.1	0.420161	1.33152	0.315551	Negative selection
145	Lus10017383	AT3G19950.3	0.287862	2.50597	0.11487	Negative selection
146	Lus10023182	AT3G53410.1	0.273895	2.27818	0.120225	Negative selection
147	Lus10015506	AT4G30370.1	0.513054	NaN	NaN	NaN
148	Lus10015502	AT4G30400.1	0.426821	NaN	NaN	NaN
149	Lus10035368	AT4G17920.1	0.517921	NaN	NaN	NaN
150	Lus10038341	AT4G19670.3	0.277419	3.99176	0.0694978	Negative selection
151	Lus10020084	AT4G21430.1	0.45795	2.26354	0.202316	Negative selection
152	Lus10028790	AT4G39050.1	0.149384	2.61203	0.0571907	Negative selection
153	Lus10015503	AT5G57740.1	0.237928	3.05815	0.0778011	Negative selection
154	Lus10015502	AT5G57750.1	0.505692	NaN	NaN	NaN
155	Lus10040240	AT5G05830.1	0.353873	NaN	NaN	NaN
156	Lus10023182	AT5G03200.1	0.282683	1.7749	0.159267	Negative selection
157	Lus10028827	AT5G04460.1	0.246002	1.86702	0.131762	Negative selection
158	Lus10003992	AT5G02750.1	0.428355	1.53958	0.278228	Negative selection
159	Lus10018465	AT1G61140.1	0.525269	2.12045	0.247715	Negative selection
160	Lus10024657	AT1G63840.1	0.40816	NaN	NaN	NaN
161	Lus10018465	AT1G11100.4	0.536195	2.92432	0.183357	Negative selection
162	Lus10025162	AT1G20823.1	0.33393	1.63349	0.204427	Negative selection
163	Lus10002487	AT2G38185.4	0.479597	1.90003	0.252416	Negative selection
164	Lus10002131	AT2G14835.2	0.202992	1.93949	0.104663	Negative selection
165	Lus10021063	AT2G42030.1	0.492381	2.90567	0.169455	Negative selection
166	Lus10012332	AT2G05170.1	0.137295	4.19309	0.0327431	Negative selection
167	Lus10022294	AT3G01650.1	0.219895	3.49639	0.062892	Negative selection
168	Lus10021063	AT3G58030.4	0.337875	NaN	NaN	NaN
169	Lus10034030	AT3G06140.1	0.309573	2.4806	0.124798	Negative selection
170	Lus10033985	AT3G06330.1	0.424221	1.78568	0.237569	Negative selection
171	Lus10022324	AT3G27330.1	0.39905	2.35412	0.169511	Negative selection
172	Lus10026501	AT3G09760.1	0.419678	2.50679	0.167416	Negative selection
173	Lus10014118	AT4G35070.1	0.517365	1.70128	0.304102	Negative selection
174	Lus10024657	AT4G11360.1	0.501889	NaN	NaN	NaN
175	Lus10033969	AT5G18650.1	0.132768	3.11423	0.0426328	Negative selection
176	Lus10033985	AT5G18760.1	0.421502	1.50315	0.280412	Negative selection
177	Lus10034030	AT5G19080.1	0.383714	NaN	NaN	NaN
178	Lus10004572	AT5G46650.1	0.602523	1.89278	0.318326	Negative selection
179	Lus10024657	AT5G41400.1	0.35374	2.45152	0.144294	Negative selection
180	Lus10021113	AT5G01070.1	0.449062	NaN	NaN	NaN
181	Lus10026501	AT5G03180.2	0.45147	3.44989	0.130865	Negative selection
182	Lus10022294	AT5G14420.4	0.208878	2.93545	0.071157	Negative selection
183	Lus10002487	AT5G01450.1	0.467099	1.92187	0.243044	Negative selection
184	Lus10004821	AT5G01520.1	0.154359	NaN	NaN	NaN
185	Lus10004712	AT2G39720.1	0.386864	NaN	NaN	NaN
186	Lus10040508	AT2G16090.1	0.242644	2.73013	0.0888766	Negative selection
187	Lus10040413	AT3G54780.4	0.254869	2.22504	0.114546	Negative selection
188	Lus10010182	AT3G19910.1	0.402779	1.38475	0.290869	Negative selection
189	Lus10010179	AT3G19950.3	0.317255	2.44789	0.129604	Negative selection
190	Lus10030972	AT4G17920.1	0.568322	2.82811	0.200955	Negative selection
191	Lus10028249	AT5G05830.1	0.37047	1.77898	0.208249	Negative selection
192	Lus10024810	AT5G42940.1	0.532157	1.66634	0.319357	Negative selection
193	Lus10017455	AT5G04460.1	0.260914	1.90897	0.136678	Negative selection
194	Lus10030972	AT5G46650.1	0.568556	1.96823	0.288866	Negative selection
195	Lus10022895	AT1G04020.1	0.569328	2.53832	0.224294	Negative selection
196	Lus10031780	AT1G79110.1	0.408113	1.55736	0.262054	Negative selection
197	Lus10042890	AT2G44950.1	0.353454	2.22562	0.158811	Negative selection
198	Lus10022774	AT3G07200.1	0.47706	2.3821	0.200269	Negative selection
199	Lus10015080	AT3G09770.1	0.227351	3.56183	0.0638297	Negative selection
200	Lus10031780	AT3G12920.1	0.425266	NaN	NaN	NaN
201	Lus10031728	AT4G25230.2	0.203603	2.33956	0.087026	Negative selection
202	Lus10031728	AT5G51450.2	0.213446	3.01473	0.0708011	Negative selection
203	Lus10027441	AT5G07270.1	0.235948	1.66945	0.141332	Negative selection
204	Lus10015046	AT5G02750.1	0.411879	1.61503	0.255029	Negative selection
205	Lus10015080	AT5G03200.1	0.30348	1.52707	0.198733	Negative selection
206	Lus10022774	AT5G48655.3	0.419009	2.26445	0.185038	Negative selection
207	Lus10031202	AT1G79110.1	0.416649	1.84255	0.226126	Negative selection
208	Lus10012975	AT2G20030.1	0.479426	NaN	NaN	NaN
209	Lus10016796	AT2G23780.1	0.274487	NaN	NaN	NaN
210	Lus10041970	AT2G21500.1	0.460259	3.2649	0.140972	Negative selection
211	Lus10036404	AT2G46160.1	0.264039	2.92262	0.0903433	Negative selection
212	Lus10038180	AT3G07120.1	0.540358	NaN	NaN	NaN
213	Lus10038180	AT3G25030.4	0.541917	NaN	NaN	NaN
214	Lus10031202	AT3G12920.1	0.390341	NaN	NaN	NaN
215	Lus10038169	AT3G24800.1	0.536624	2.1718	0.247087	Negative selection
216	Lus10036378	AT3G61460.1	0.271227	2.50578	0.108241	Negative selection
217	Lus10036404	AT3G61550.1	0.261416	3.63926	0.0718322	Negative selection
218	Lus10036569	AT3G61180.1	0.384458	2.61854	0.146821	Negative selection
219	Lus10036378	AT4G00305.1	0.592671	1.32161	0.448448	Negative selection
220	Lus10041970	AT4G39140.4	0.409084	NaN	NaN	NaN
221	Lus10012975	AT4G28890.1	0.428429	2.38329	0.179764	Negative selection
222	Lus10031152	AT4G25230.2	0.205528	2.61768	0.0785153	Negative selection
223	Lus10038180	AT4G13100.2	0.661801	NaN	NaN	NaN
224	Lus10019018	AT5G53110.1	0.430474	NaN	NaN	NaN
225	Lus10026420	AT5G58410.1	0.404918	2.36686	0.171078	Negative selection
226	Lus10031152	AT5G51450.2	0.215053	2.59217	0.0829625	Negative selection
227	Lus10005754	AT5G07270.1	0.215141	1.89413	0.113583	Negative selection
228	Lus10038169	AT5G48800.1	0.19198	NaN	NaN	NaN
229	Lus10026226	AT5G10650.1	0.640778	1.75693	0.364714	Negative selection
230	Lus10016561	AT2G28840.1	0.196744	1.7753	0.110823	Negative selection
231	Lus10006493	AT2G47560.1	0.505981	1.82652	0.277019	Negative selection
232	Lus10034953	AT2G20030.1	0.516051	2.56929	0.200854	Negative selection
233	Lus10031515	AT3G05200.1	0.49996	2.18092	0.229242	Negative selection
234	Lus10031491	AT3G05545.1	0.492472	5.56498	0.0884948	Negative selection
235	Lus10031468	AT3G05670.1	0.498473	NaN	NaN	NaN
236	Lus10006493	AT3G16720.1	0.427474	1.79883	0.23764	Negative selection
237	Lus10004419	AT3G06140.1	0.300957	2.77226	0.108561	Negative selection
238	Lus10012793	AT3G06330.1	0.520973	2.31074	0.225458	Negative selection
239	Lus10036202	AT4G19670.3	0.265666	2.45832	0.108068	Negative selection
240	Lus10018293	AT4G19670.3	0.323501	2.70938	0.1194	Negative selection
241	Lus10018294	AT4G19700.1	0.389212	NaN	NaN	NaN
242	Lus10006741	AT4G21430.1	0.454826	2.213	0.205525	Negative selection
243	Lus10034953	AT4G28890.1	0.44727	2.70115	0.165585	Negative selection
244	Lus10006493	AT4G15975.1	0.530724	2.21642	0.239452	Negative selection
245	Lus10019979	AT4G30370.1	0.476363	2.16305	0.220228	Negative selection
246	Lus10019973	AT4G30400.1	0.419013	NaN	NaN	NaN
247	Lus10012811	AT5G18650.1	0.121722	2.8384	0.0428842	Negative selection
248	Lus10012791	AT5G18760.1	0.419134	1.4947	0.280413	Negative selection
249	Lus10004419	AT5G19080.1	0.357877	NaN	NaN	NaN
250	Lus10031515	AT5G27420.1	0.419479	NaN	NaN	NaN
251	Lus10001209	AT5G58787.1	0.178098	NaN	NaN	NaN
252	Lus10016451	AT5G59000.1	0.435404	1.89147	0.230193	Negative selection
253	Lus10019974	AT5G57740.1	0.225579	2.79184	0.0807993	Negative selection
254	Lus10018294	AT5G45100.1	0.348958	NaN	NaN	Negative selection
255	Lus10043365	AT5G22750.1	0.236181	3.32856	0.070956	Negative selection
256	Lus10010791	AT1G74990.1	0.358748	2.18767	0.163986	Negative selection
257	Lus10035057	AT1G68820.4	0.176955	2.2362	0.0791318	Negative selection
258	Lus10010791	AT1G19310.1	0.215537	2.82308	0.0763482	Negative selection
259	Lus10001654	AT1G74410.1	0.288013	3.14619	0.0915434	Negative selection
260	Lus10030464	AT1G14200.1	0.469701	1.47005	0.319513	Negative selection
261	Lus10026648	AT1G69330.1	0.388869	NaN	NaN	Negative selection
262	Lus10030464	AT1G26800.1	0.373588	1.29925	0.287541	Negative selection
263	Lus10030728	AT1G20823.1	0.288665	2.59221	0.111359	Negative selection
264	Lus10011405	AT1G67800.2	0.256677	NaN	NaN	NaN
265	Lus10011416	AT1G67856.1	0.412012	2.25426	0.18277	Negative selection
266	Lus10011391	AT1G24440.1	0.203502	1.99625	0.101942	Negative selection
267	Lus10011416	AT1G24580.1	0.313317	1.53262	0.204432	Negative selection
268	Lus10030728	AT1G76410.1	0.304331	2.7704	0.109851	Negative selection
269	Lus10030472	AT2G02960.5	0.302401	1.26828	0.238434	Negative selection
270	Lus10030512	AT2G40770.1	0.30564	1.92847	0.158489	Negative selection
271	Lus10026941	AT4G31450.2	0.607304	3.86909	0.156963	Negative selection
272	Lus10000845	AT4G37110.1	0.561787	NaN	NaN	NaN
273	Lus10026941	AT5G10650.1	0.593009	2.28863	0.259111	Negative selection
274	Lus10026941	AT5G24870.3	0.537579	5.38047	0.099913	Negative selection
275	Lus10032161	AT5G40250.1	0.235942	3.47569	0.0678834	Negative selection
276	Lus10042156	AT1G74870.1	0.647402	NaN	NaN	NaN
277	Lus10009438	AT1G71980.1	0.364998	NaN	NaN	NaN
278	Lus10028560	AT1G21650.3	0.418432	2.58857	0.161646	Negative selection
279	Lus10022492	AT2G23780.1	0.286907	NaN	NaN	NaN
280	Lus10017969	AT2G21380.2	0.184244	2.02598	0.0909404	Negative selection
281	Lus10017978	AT2G21500.1	0.458481	2.64005	0.173664	Negative selection
282	Lus10042126	AT3G47990.1	0.316447	1.84737	0.171296	Negative selection
283	Lus10013144	AT4G32600.1	0.266358	1.8185	0.146471	Negative selection
284	Lus10017969	AT4G39050.1	0.162091	2.53242	0.0640066	Negative selection
285	Lus10017978	AT4G39140.4	0.407967	NaN	NaN	NaN
286	Lus10013374	AT5G22000.1	0.303124	1.26032	0.240513	Negative selection
287	Lus10021482	AT5G60580.4	0.275318	2.01402	0.136701	Negative selection
288	Lus10021458	AT5G60710.1	0.300314	NaN	NaN	NaN
289	Lus10011211	AT1G11100.4	0.47312	2.68548	0.176177	Negative selection
290	Lus10010011	AT1G02610.1	0.456077	2.83455	0.160899	Negative selection
291	Lus10007293	AT2G34200.1	0.59942	1.42002	0.422121	Negative selection
292	Lus10029292	AT2G42030.1	0.460985	NaN	NaN	NaN
293	Lus10041301	AT2G28450.1	0.345071	1.81889	0.189716	Negative selection
294	Lus10004001	AT3G61790.1	0.134495	NaN	NaN	NaN
295	Lus10041359	AT3G61180.1	0.367125	2.89551	0.126791	Negative selection
296	Lus10007296	AT4G18780.1	0.10912	2.80436	0.0389108	Negative selection
297	Lus10002679	AT4G00800.1	0.356662	2.02905	0.175778	Negative selection
298	Lus10010011	AT4G02075.1	0.413722	3.21372	0.128736	Negative selection
299	Lus10040914	AT4G01023.2	0.523856	2.3236	0.22545	Negative selection
300	Lus10037928	AT5G04460.1	0.272627	1.87896	0.145095	Negative selection
301	Lus10041301	AT5G60580.4	0.307256	2.35532	0.130452	Negative selection
302	Lus10041321	AT5G60710.1	0.338485	NaN	NaN	NaN
303	Lus10012745	AT5G10380.1	0.654608	3.31774	0.197306	Negative selection
304	Lus10022567	AT5G55970.1	0.305016	3.19684	0.0954118	Negative selection

## Sheet: Flax_Grape
Table S4. Orthologous relationships of RING finger genes between flax and other four plant species.
NO.	Flax RING ID	Grape RING ID	Ka	Ks	Ka/Ks	Selection pressure
1	Lus10029136	VIT_201s0127g00360.1	0.218258	2.50555	0.0871102	Negative selection
2	Lus10029178	VIT_201s0026g00300.1	0.345357	4.99892	0.0690864	Negative selection
3	Lus10005111	VIT_201s0011g03820.1	0.160303	1.23609	0.129686	Negative selection
4	Lus10005084	VIT_214s0083g01000.1	0.113643	1.31839	0.086198	Negative selection
5	Lus10018817	VIT_215s0046g02210.1	0.419664	1.48658	0.282301	Negative selection
6	Lus10018110	VIT_216s0098g01850.1	0.0787174	3.43332	0.0229275	Negative selection
7	Lus10018140	VIT_218s0001g02280.1	0.524648	NaN	NaN	NaN
8	Lus10015901	VIT_218s0001g06640.1	0.513746	2.7146	0.189253	Negative selection
9	Lus10027027	VIT_205s0102g00160.1	0.17383	1.40791	0.123467	Negative selection
10	Lus10042277	VIT_206s0004g06930.1	0.578079	1.95721	0.295359	Negative selection
11	Lus10009695	VIT_206s0009g03430.1	0.27613	2.17008	0.127244	Negative selection
12	Lus10036034	VIT_206s0009g03430.1	0.272974	2.00103	0.136417	Negative selection
13	Lus10036140	VIT_206s0004g03580.3	0.289541	1.30907	0.22118	Negative selection
14	Lus10036128	VIT_206s0004g03320.1	0.352192	1.93223	0.182273	Negative selection
15	Lus10022585	VIT_206s0004g02930.1	0.240259	1.64348	0.146189	Negative selection
16	Lus10016102	VIT_206s0004g02630.1	0.267288	2.20446	0.121249	Negative selection
17	Lus10018125	VIT_206s0004g03580.3	0.297175	1.45138	0.204753	Negative selection
18	Lus10027994	VIT_207s0104g00630.1	0.128709	1.94131	0.0663	Negative selection
19	Lus10014749	VIT_207s0141g00610.2	0.248772	1.35696	0.183331	Negative selection
20	Lus10022743	VIT_208s0058g01270.1	0.386244	2.12491	0.18177	Negative selection
21	Lus10035549	VIT_208s0007g01530.1	0.407023	3.02056	0.134751	Negative selection
22	Lus10027744	VIT_208s0007g01530.1	0.392196	NaN	NaN	NaN
23	Lus10016255	VIT_208s0007g06660.2	0.26644	2.38557	0.111688	Negative selection
24	Lus10035553	VIT_208s0007g04490.1	0.242196	1.55263	0.15599	Negative selection
25	Lus10012826	VIT_201s0026g02470.1	0.167082	2.03537	0.082089	Negative selection
26	Lus10012819	VIT_201s0026g02540.1	0.397154	1.18158	0.336121	Negative selection
27	Lus10021710	VIT_201s0011g02950.1	0.18487	1.40019	0.132032	Negative selection
28	Lus10006448	VIT_201s0010g02200.2	0.226254	1.66028	0.136275	Negative selection
29	Lus10006447	VIT_201s0010g02220.1	0.181177	2.09963	0.0862898	Negative selection
30	Lus10035271	VIT_201s0011g04590.3	0.263721	1.63709	0.161091	Negative selection
31	Lus10006463	VIT_201s0137g00460.1	0.219423	2.85247	0.0769237	Negative selection
32	Lus10030599	VIT_201s0127g00360.1	0.19575	1.85257	0.105664	Negative selection
33	Lus10021801	VIT_201s0011g05750.1	0.203916	1.30715	0.156001	Negative selection
34	Lus10021722	VIT_201s0011g04080.2	0.880499	2.63043	0.334736	Negative selection
35	Lus10038095	VIT_211s0016g05600.1	0.211343	1.36453	0.154883	Negative selection
36	Lus10038656	VIT_213s0019g05390.1	0.146857	1.18486	0.123944	Negative selection
37	Lus10012867	VIT_213s0067g03190.1	0.241904	1.27535	0.189677	Negative selection
38	Lus10016416	VIT_213s0064g01030.1	0.244535	1.58276	0.154499	Negative selection
39	Lus10014526	VIT_214s0066g01610.1	0.182212	1.63221	0.111635	Negative selection
40	Lus10030699	VIT_214s0108g01430.3	0.200683	1.60342	0.125159	Negative selection
41	Lus10021670	VIT_217s0000g06230.2	0.194006	1.48232	0.130881	Negative selection
42	Lus10021628	VIT_217s0000g06460.1	0.273273	1.52164	0.17959	Negative selection
43	Lus10013210	VIT_218s0122g00870.1	0.223924	1.36824	0.163659	Negative selection
44	Lus10016303	VIT_218s0001g11890.6	0.103162	1.3626	0.07571	Negative selection
45	Lus10020145	VIT_204s0008g02390.1	0.384571	2.06189	0.186514	Negative selection
46	Lus10038048	VIT_207s0005g02190.3	0.281436	1.91877	0.146675	Negative selection
47	Lus10016428	VIT_207s0031g01270.1	0.622035	2.42746	0.256249	Negative selection
48	Lus10016426	VIT_207s0031g01280.1	0.0694109	1.08075	0.0642246	Negative selection
49	Lus10037172	VIT_201s0026g02470.1	0.197348	2.58219	0.0764266	Negative selection
50	Lus10037170	VIT_201s0026g02540.1	0.480916	1.16413	0.413111	Negative selection
51	Lus10037162	VIT_201s0026g02640.1	0.332258	2.01616	0.164798	Negative selection
52	Lus10019150	VIT_201s0011g02360.1	0.732927	NaN	NaN	NaN
53	Lus10037053	VIT_201s0010g02220.1	0.181516	1.43067	0.126875	Negative selection
54	Lus10006253	VIT_201s0010g02200.2	0.184192	1.51733	0.121392	Negative selection
55	Lus10013491	VIT_201s0011g04610.4	0.149579	1.59796	0.0936063	Negative selection
56	Lus10040613	VIT_210s0042g01070.2	0.346217	NaN	NaN	NaN
57	Lus10040616	VIT_210s0042g01130.1	0.248729	1.67364	0.148615	Negative selection
58	Lus10029245	VIT_210s0003g01560.1	0.0988629	1.54008	0.0641934	Negative selection
59	Lus10029242	VIT_210s0003g01500.1	0.457833	1.94409	0.2355	Negative selection
60	Lus10005275	VIT_210s0003g00850.1	0.506651	NaN	NaN	NaN
61	Lus10005275	VIT_212s0028g02530.1	0.57587	NaN	NaN	NaN
62	Lus10012628	VIT_215s0046g00930.1	0.412594	2.96954	0.138942	Negative selection
63	Lus10037172	VIT_217s0000g06230.2	0.1934	NaN	NaN	NaN
64	Lus10003473	VIT_217s0000g06800.2	0.239809	1.2663	0.189377	Negative selection
65	Lus10019075	VIT_217s0000g06610.1	0.295414	1.27742	0.231258	Negative selection
66	Lus10019102	VIT_217s0000g06230.2	0.193189	1.53377	0.125957	Negative selection
67	Lus10023068	VIT_202s0025g01650.1	0.360985	1.4323	0.252033	Negative selection
68	Lus10023055	VIT_202s0025g01990.1	0.409525	1.74331	0.234912	Negative selection
69	Lus10037490	VIT_205s0077g01970.1	0.424244	NaN	NaN	NaN
70	Lus10021954	VIT_205s0020g02320.5	0.250756	1.35113	0.18559	Negative selection
71	Lus10040783	VIT_206s0004g05090.1	0.278693	3.04048	0.0916609	Negative selection
72	Lus10040829	VIT_206s0004g04550.1	0.129978	1.65546	0.0785148	Negative selection
73	Lus10040716	VIT_206s0004g05850.1	0.349167	1.91267	0.182554	Negative selection
74	Lus10037410	VIT_206s0004g02930.1	0.29267	1.67202	0.17504	Negative selection
75	Lus10013397	VIT_206s0004g00120.1	0.24923	2.49357	0.099949	Negative selection
76	Lus10033860	VIT_207s0141g00610.2	0.252251	1.3664	0.18461	Negative selection
77	Lus10040716	VIT_208s0007g01530.1	0.44554	NaN	NaN	NaN
78	Lus10040829	VIT_208s0007g00200.1	0.197355	1.81846	0.108528	Negative selection
79	Lus10036757	VIT_201s0026g02540.1	0.480362	1.22086	0.393462	Negative selection
80	Lus10013027	VIT_201s0127g00360.1	0.20041	2.30149	0.0870785	Negative selection
81	Lus10012987	VIT_201s0026g00300.1	0.306608	3.22244	0.095148	Negative selection
82	Lus10034407	VIT_201s0011g02380.1	0.646799	2.14539	0.301483	Negative selection
83	Lus10034346	VIT_201s0011g03820.1	0.161077	1.23845	0.130064	Negative selection
84	Lus10036934	VIT_201s0010g02220.1	0.178412	1.32366	0.134786	Negative selection
85	Lus10036937	VIT_201s0010g02200.2	0.19324	1.49816	0.128985	Negative selection
86	Lus10030044	VIT_210s0116g01490.1	0.406559	2.20833	0.184103	Negative selection
87	Lus10039845	VIT_212s0028g03340.2	0.443803	2.44104	0.181809	Negative selection
88	Lus10039848	VIT_212s0028g03410.1	0.100366	1.46896	0.0683247	Negative selection
89	Lus10039821	VIT_212s0028g03860.3	0.536467	2.78573	0.192577	Negative selection
90	Lus10039848	VIT_212s0028g03410.1	0.100366	1.46896	0.0683247	Negative selection
91	Lus10030044	VIT_212s0059g00800.1	0.278722	1.89106	0.14739	Negative selection
92	Lus10029990	VIT_212s0059g01420.1	0.151432	1.7869	0.0847454	Negative selection
93	Lus10029993	VIT_212s0059g01370.1	0.153753	1.35193	0.113729	Negative selection
94	Lus10004058	VIT_214s0006g01980.3	0.21606	1.56267	0.138264	Negative selection
95	Lus10020655	VIT_214s0060g02280.6	0.2121	1.54325	0.137437	Negative selection
96	Lus10034367	VIT_214s0083g01000.1	0.134809	1.32132	0.102026	Negative selection
97	Lus10009810	VIT_215s0046g01030.1	0.143402	1.93171	0.0742357	Negative selection
98	Lus10036754	VIT_217s0000g06230.2	0.169587	NaN	NaN	NaN
99	Lus10015732	VIT_217s0000g06800.2	0.238823	1.43181	0.166798	Negative selection
100	Lus10015722	VIT_217s0000g06610.1	0.233396	1.24741	0.187105	Negative selection
101	Lus10034454	VIT_217s0000g06230.2	0.183865	1.48324	0.123962	Negative selection
102	Lus10003485	VIT_218s0001g08100.1	0.378865	2.89817	0.130726	Negative selection
103	Lus10041907	VIT_204s0023g03440.2	0.309961	1.45467	0.21308	Negative selection
104	Lus10030375	VIT_207s0005g00280.1	0.203956	1.74239	0.117055	Negative selection
105	Lus10018609	VIT_210s0003g00080.1	0.335764	NaN	NaN	NaN
106	Lus10018589	VIT_212s0028g03860.3	0.450596	3.23899	0.139117	Negative selection
107	Lus10018613	VIT_212s0028g03410.1	0.104592	1.40296	0.0745512	Negative selection
108	Lus10035332	VIT_212s0059g01420.1	0.152574	1.66627	0.0915656	Negative selection
109	Lus10035335	VIT_212s0059g01370.1	0.159568	1.09752	0.145389	Negative selection
110	Lus10024124	VIT_213s0084g00140.1	0.249755	1.2226	0.204281	Negative selection
111	Lus10024135	VIT_213s0084g00680.1	0.203124	2.24156	0.0906171	Negative selection
112	Lus10039607	VIT_213s0064g00890.1	0.0857209	1.39278	0.0615468	Negative selection
113	Lus10000333	VIT_214s0128g00120.1	0.358166	2.49007	0.143838	Negative selection
114	Lus10029886	VIT_214s0060g02280.6	0.228592	1.8285	0.125016	Negative selection
115	Lus10008797	VIT_214s0066g01465.1	0.531234	NaN	NaN	NaN
116	Lus10029693	VIT_218s0001g02280.1	0.545432	2.38405	0.228783	Negative selection
117	Lus10032270	VIT_202s0025g00030.1	0.373442	1.42731	0.26164	Negative selection
118	Lus10032290	VIT_202s0025g00140.1	0.227179	2.75848	0.0823566	Negative selection
119	Lus10032382	VIT_202s0025g01430.1	0.54619	1.98431	0.275254	Negative selection
120	Lus10032402	VIT_202s0025g01650.1	0.380131	1.46168	0.260065	Negative selection
121	Lus10032418	VIT_202s0025g01990.1	0.360167	1.5486	0.232576	Negative selection
122	Lus10008283	VIT_202s0025g02885.1	0.546369	NaN	NaN	NaN
123	Lus10008286	VIT_202s0025g03030.1	0.282829	1.85602	0.152385	Negative selection
124	Lus10029582	VIT_202s0025g04150.2	0.151811	2.16268	0.0701958	Negative selection
125	Lus10028454	VIT_204s0023g03460.1	0.770724	2.47502	0.311402	Negative selection
126	Lus10028443	VIT_204s0023g03580.1	0.432855	1.78855	0.242015	Negative selection
127	Lus10021197	VIT_205s0049g00480.1	0.302549	NaN	NaN	NaN
128	Lus10021197	VIT_207s0005g03120.1	0.473644	NaN	NaN	NaN
129	Lus10034832	VIT_209s0054g00830.1	0.178507	1.21504	0.146915	Negative selection
130	Lus10017764	VIT_211s0016g04730.1	0.119213	1.26868	0.0939655	Negative selection
131	Lus10001683	VIT_211s0118g00760.2	0.378884	1.23547	0.306672	Negative selection
132	Lus10001685	VIT_211s0118g00780.3	0.391732	1.9603	0.199832	Negative selection
133	Lus10033697	VIT_212s0028g03860.3	0.4424	NaN	NaN	NaN
134	Lus10015152	VIT_212s0059g01370.1	0.320348	1.21349	0.26399	Negative selection
135	Lus10006378	VIT_212s0057g00590.1	0.0890733	1.21595	0.073254	Negative selection
136	Lus10024405	VIT_213s0019g00990.1	0.737139	1.96721	0.374712	Negative selection
137	Lus10017197	VIT_213s0019g03190.2	0.299931	NaN	NaN	NaN
138	Lus10034088	VIT_214s0083g00440.1	0.569325	1.59323	0.357341	Negative selection
139	Lus10032471	VIT_217s0000g04160.4	0.126728	1.14007	0.111159	Negative selection
140	Lus10017253	VIT_218s0001g01050.1	0.409506	1.67941	0.243839	Negative selection
141	Lus10016040	VIT_218s0122g00870.1	0.243948	1.06999	0.22799	Negative selection
142	Lus10019839	VIT_203s0063g00080.2	0.137118	1.34929	0.101622	Negative selection
143	Lus10019790	VIT_203s0038g02450.1	0.38279	NaN	NaN	NaN
144	Lus10000023	VIT_206s0004g05090.1	0.309687	2.06192	0.150193	Negative selection
145	Lus10000023	VIT_208s0007g00720.1	0.360672	2.65665	0.135762	Negative selection
146	Lus10004162	VIT_208s0007g06660.2	0.272798	NaN	NaN	NaN
147	Lus10015986	VIT_208s0032g00680.1	0.209272	1.58483	0.132047	Negative selection
148	Lus10025228	VIT_208s0058g01270.1	0.514376	2.49394	0.206251	Negative selection
149	Lus10017197	VIT_208s0007g01530.1	0.258573	2.6698	0.0968512	Negative selection
150	Lus10013821	VIT_208s0007g04920.1	0.351567	1.30356	0.269698	Negative selection
151	Lus10025394	VIT_210s0003g01500.1	0.514826	3.96517	0.129837	Negative selection
152	Lus10009511	VIT_211s0016g03420.1	0.500185	NaN	NaN	NaN
153	Lus10001611	VIT_212s0034g01390.1	0.584139	NaN	NaN	NaN
154	Lus10040240	VIT_213s0019g03190.2	0.339544	2.45088	0.13854	Negative selection
155	Lus10023527	VIT_213s0019g04440.1	0.158903	1.91241	0.0830907	Negative selection
156	Lus10023507	VIT_213s0019g04100.1	0.497956	1.09762	0.45367	Negative selection
157	Lus10028827	VIT_213s0019g05390.1	0.161659	1.40809	0.114807	Negative selection
158	Lus10028773	VIT_202s0025g00140.1	0.306922	2.92621	0.104888	Negative selection
159	Lus10028790	VIT_203s0038g00350.1	0.129326	1.35272	0.0956048	Negative selection
160	Lus10001568	VIT_206s0004g05080.1	0.218688	1.83707	0.119041	Negative selection
161	Lus10023182	VIT_208s0040g01940.1	0.148105	1.83449	0.0807336	Negative selection
162	Lus10040240	VIT_208s0007g01530.1	0.562984	1.23753	0.454926	Negative selection
163	Lus10040278	VIT_208s0007g00720.1	0.279491	NaN	NaN	NaN
164	Lus10003992	VIT_208s0040g02950.1	0.406035	1.10572	0.367215	Negative selection
165	Lus10012332	VIT_212s0057g00590.1	0.0931077	1.25689	0.0740781	Negative selection
166	Lus10022324	VIT_214s0219g00030.1	0.306649	1.60385	0.191195	Negative selection
167	Lus10022223	VIT_214s0066g01465.1	0.615878	NaN	NaN	NaN
168	Lus10003400	VIT_216s0098g00250.1	0.321199	NaN	NaN	NaN
169	Lus10005617	VIT_218s0001g01050.1	0.423814	2.03589	0.208172	Negative selection
170	Lus10025162	VIT_218s0122g00870.1	0.269286	1.10395	0.243929	Negative selection
171	Lus10024635	VIT_202s0025g00030.1	0.270448	1.44147	0.18762	Negative selection
172	Lus10024657	VIT_202s0025g00140.1	0.214438	1.65876	0.129276	Negative selection
173	Lus10000908	VIT_202s0012g01750.1	0.320441	1.99229	0.16084	Negative selection
174	Lus10000899	VIT_202s0012g01020.1	0.199221	1.31577	0.15141	Negative selection
175	Lus10004557	VIT_202s0012g01020.1	0.205531	1.3909	0.147768	Negative selection
176	Lus10014118	VIT_203s0038g02450.1	0.338163	NaN	NaN	NaN
177	Lus10002131	VIT_203s0091g00720.1	0.129506	1.11408	0.116244	Negative selection
178	Lus10002113	VIT_203s0091g00480.2	0.400726	1.90181	0.210707	Negative selection
179	Lus10033969	VIT_205s0020g01800.2	0.12609	1.4607	0.0863217	Negative selection
180	Lus10033985	VIT_205s0020g02080.2	0.274584	1.51945	0.180713	Negative selection
181	Lus10034030	VIT_205s0020g02680.1	0.214646	1.65077	0.130028	Negative selection
182	Lus10010513	VIT_205s0020g02860.1	0.490129	1.4641	0.334766	Negative selection
183	Lus10023671	VIT_205s0051g00730.1	0.395278	1.11162	0.355587	Negative selection
184	Lus10026501	VIT_208s0040g01950.1	0.308489	1.61534	0.190975	Negative selection
185	Lus10021113	VIT_208s0007g01530.1	0.28638	2.87987	0.0994421	Negative selection
186	Lus10021063	VIT_208s0007g06660.2	0.267506	5.02739	0.0532097	Negative selection
187	Lus10004821	VIT_208s0007g02210.1	0.129573	NaN	NaN	NaN
188	Lus10002487	VIT_208s0105g00290.2	0.378531	1.93787	0.195333	Negative selection
189	Lus10023914	VIT_208s0007g04790.2	0.163814	1.52766	0.107232	Negative selection
190	Lus10025145	VIT_208s0058g01270.1	0.516609	1.34678	0.383589	Negative selection
191	Lus10028249	VIT_213s0019g03190.2	0.338089	1.82081	0.18568	Negative selection
192	Lus10040413	VIT_213s0019g04440.1	0.165467	1.82224	0.0908044	Negative selection
193	Lus10040389	VIT_213s0019g04100.1	0.473534	1.08178	0.437736	Negative selection
194	Lus10017455	VIT_213s0019g05390.1	0.165183	1.40893	0.11724	Negative selection
195	Lus10024810	VIT_218s0001g10260.4	0.366295	1.26823	0.288822	Negative selection
196	Lus10017510	VIT_202s0025g00140.1	0.283563	NaN	NaN	NaN
197	Lus10024881	VIT_207s0005g03120.1	0.594703	NaN	NaN	NaN
198	Lus10002639	VIT_208s0007g07610.2	0.329491	3.099	0.106322	Negative selection
199	Lus10028249	VIT_208s0007g01530.1	0.458949	1.21679	0.37718	Negative selection
200	Lus10004712	VIT_208s0007g00720.1	0.352201	NaN	NaN	NaN
201	Lus10007538	VIT_208s0007g08380.1	0.0974593	1.34432	0.0724971	Negative selection
202	Lus10000533	VIT_209s0002g01180.1	0.257633	1.35932	0.18953	Negative selection
203	Lus10022967	VIT_212s0034g01390.1	0.531364	NaN	NaN	NaN
204	Lus10042890	VIT_215s0021g02140.1	0.234953	1.52432	0.154136	Negative selection
205	Lus10027441	VIT_216s0100g00690.1	0.130422	1.47684	0.088312	Negative selection
206	Lus10031728	VIT_216s0022g00600.2	0.176995	1.29602	0.136567	Negative selection
207	Lus10001131	VIT_218s0001g10370.1	0.201298	2.5572	0.0787181	Negative selection
208	Lus10031780	VIT_219s0027g00740.1	0.358871	2.855	0.125699	Negative selection
209	Lus10000710	VIT_207s0005g03120.1	0.588823	NaN	NaN	NaN
210	Lus10022895	VIT_207s0005g03940.1	0.422936	1.71126	0.247149	Negative selection
211	Lus10015046	VIT_208s0040g02950.1	0.485836	0.962183	0.504931	Negative selection
212	Lus10020256	VIT_208s0007g07610.2	0.349508	NaN	NaN	NaN
213	Lus10015080	VIT_208s0040g01940.1	0.137417	2.43262	0.0564892	Negative selection
214	Lus10012975	VIT_211s0016g03420.1	0.45527	NaN	NaN	NaN
215	Lus10036404	VIT_215s0046g02070.1	0.32933	1.13706	0.289632	Negative selection
216	Lus10036569	VIT_215s0048g02030.1	0.326038	2.24781	0.145047	Negative selection
217	Lus10036378	VIT_215s0046g01880.1	0.272265	1.46778	0.185494	Negative selection
218	Lus10005754	VIT_216s0100g00690.1	0.117524	1.47553	0.0796491	Negative selection
219	Lus10031152	VIT_216s0022g00600.2	0.178351	1.36279	0.130872	Negative selection
220	Lus10019018	VIT_216s0098g00250.1	0.382119	NaN	NaN	NaN
221	Lus10002369	VIT_217s0000g08210.1	0.168267	1.56767	0.107335	Negative selection
222	Lus10004246	VIT_217s0000g07550.1	0.363666	1.71746	0.211747	Negative selection
223	Lus10042188	VIT_217s0000g05480.1	0.190567	1.89754	0.100428	Negative selection
224	Lus10036466	VIT_218s0001g06670.1	0.650849	3.3855	0.192246	Negative selection
225	Lus10021524	VIT_219s0090g00400.1	0.346968	NaN	NaN	NaN
226	Lus10036378	VIT_202s0025g00140.1	0.322335	1.31868	0.244438	Negative selection
227	Lus10016796	VIT_203s0063g02050.1	0.246044	2.81545	0.0873905	Negative selection
228	Lus10016796	VIT_204s0023g01130.1	0.337824	2.27208	0.148685	Negative selection
229	Lus10026420	VIT_206s0004g07570.1	0.32448	1.3183	0.246134	Negative selection
230	Lus10026380	VIT_206s0004g06920.1	0.130718	1.31235	0.0996063	Negative selection
231	Lus10025031	VIT_207s0005g01360.1	0.335038	1.42103	0.235772	Negative selection
232	Lus10016817	VIT_207s0031g01490.1	0.176808	1.07143	0.16502	Negative selection
233	Lus10016817	VIT_207s0031g01490.1	0.176808	1.07143	0.16502	Negative selection
234	Lus10015273	VIT_210s0003g01500.1	0.385379	2.74256	0.140518	Negative selection
235	Lus10020033	VIT_210s0116g00960.1	0.274382	1.54239	0.177894	Negative selection
236	Lus10018293	VIT_210s0042g01130.1	0.250182	1.55281	0.161116	Negative selection
237	Lus10018294	VIT_210s0042g01070.2	0.354106	2.40654	0.147143	Negative selection
238	Lus10033053	VIT_211s0016g04730.1	0.100093	1.34474	0.0744332	Negative selection
239	Lus10043027	VIT_211s0016g03190.1	0.597552	NaN	NaN	NaN
240	Lus10034953	VIT_211s0016g03420.1	0.418808	NaN	NaN	NaN
241	Lus10030120	VIT_211s0118g00780.3	0.363904	2.44856	0.148619	Negative selection
242	Lus10030117	VIT_211s0118g00760.2	0.36319	1.2574	0.288841	Negative selection
243	Lus10031618	VIT_212s0057g00230.1	0.0984644	1.62155	0.0607225	Negative selection
244	Lus10031468	VIT_214s0060g01560.1	0.475497	4.37742	0.108625	Negative selection
245	Lus10042969	VIT_217s0000g04160.4	0.130695	1.19922	0.108983	Negative selection
246	Lus10006493	VIT_205s0077g01970.1	0.434352	NaN	NaN	NaN
247	Lus10012811	VIT_205s0020g01800.2	0.116473	1.50966	0.0771517	Negative selection
248	Lus10012793	VIT_205s0020g02080.2	0.479962	6.5152	0.0736679	Negative selection
249	Lus10004419	VIT_205s0020g02680.1	0.225785	1.39933	0.161352	Negative selection
250	Lus10016561	VIT_206s0004g04550.1	0.139463	1.6495	0.0845485	Negative selection
251	Lus10016541	VIT_206s0004g04733.1	0.755011	NaN	NaN	NaN
252	Lus10016451	VIT_206s0004g05850.1	0.360726	2.14028	0.168542	Negative selection
253	Lus10004977	VIT_206s0004g05080.1	0.216785	1.65868	0.130697	Negative selection
254	Lus10001209	VIT_206s0004g06530.1	0.190953	1.91772	0.0995731	Negative selection
255	Lus10006493	VIT_207s0005g00710.1	0.514133	2.23687	0.229845	Negative selection
256	Lus10012811	VIT_207s0104g01370.1	0.243826	3.33551	0.0731002	Negative selection
257	Lus10016561	VIT_208s0007g00200.1	0.228893	2.19174	0.104434	Negative selection
258	Lus10016451	VIT_208s0007g01530.1	0.407228	NaN	NaN	NaN
259	Lus10030464	VIT_201s0026g02540.1	0.395013	1.28452	0.307518	Negative selection
260	Lus10011391	VIT_201s0010g02200.2	0.232081	2.13454	0.108726	Negative selection
261	Lus10011390	VIT_201s0010g02220.1	0.183071	1.61177	0.113584	Negative selection
262	Lus10035057	VIT_201s0011g02950.1	0.176005	1.31702	0.133639	Negative selection
263	Lus10034640	VIT_201s0011g04590.3	0.242916	1.30061	0.186771	Negative selection
264	Lus10011416	VIT_201s0137g00780.1	0.736167	2.57549	0.285836	Negative selection
265	Lus10011405	VIT_201s0137g00460.1	0.21827	NaN	NaN	NaN
266	Lus10008046	VIT_211s0118g00330.1	0.451063	2.05857	0.219115	Negative selection
267	Lus10006651	VIT_211s0016g05600.1	0.217989	1.3219	0.164906	Negative selection
268	Lus10030512	VIT_213s0067g03190.1	0.267987	1.28866	0.207958	Negative selection
269	Lus10019703	VIT_213s0064g01030.1	0.238909	1.61525	0.147908	Negative selection
270	Lus10032161	VIT_214s0066g01610.1	0.186626	1.86491	0.100072	Negative selection
271	Lus10026648	VIT_214s0108g01430.3	0.402409	NaN	NaN	NaN
272	Lus10005220	VIT_214s0108g01430.3	0.185224	1.49425	0.123958	Negative selection
273	Lus10032119	VIT_214s0219g00030.1	0.332838	2.54558	0.130751	Negative selection
274	Lus10001654	VIT_217s0000g06460.1	0.265259	1.74744	0.151799	Negative selection
275	Lus10035010	VIT_217s0000g06230.2	0.197817	1.44357	0.137034	Negative selection
276	Lus10030728	VIT_218s0122g00870.1	0.204561	1.36556	0.1498	Negative selection
277	Lus10025691	VIT_218s0001g02280.1	0.51044	NaN	NaN	NaN
278	Lus10010791	VIT_218s0001g11890.6	0.0989128	1.60525	0.0616185	Negative selection
279	Lus10025612	VIT_218s0001g03270.2	0.450189	NaN	NaN	NaN
280	Lus10034551	VIT_218s0001g01050.1	0.440257	1.43394	0.307025	Negative selection
281	Lus10026941	VIT_204s0008g02390.1	0.392099	1.79925	0.217923	Negative selection
282	Lus10019687	VIT_207s0031g01280.1	0.0649259	1.08254	0.0599754	Negative selection
283	Lus10019686	VIT_207s0031g01270.1	0.66957	2.57698	0.259828	Negative selection
284	Lus10042156	VIT_217s0000g07550.1	0.356684	2.09708	0.170086	Negative selection
285	Lus10042126	VIT_217s0000g08210.1	0.213787	1.31651	0.16239	Negative selection
286	Lus10022492	VIT_218s0001g11890.6	0.194833	2.24324	0.0868533	Negative selection
287	Lus10028560	VIT_218s0001g01930.3	0.35159	1.9616	0.179237	Negative selection
288	Lus10017978	VIT_203s0038g04400.5	0.28514	1.75369	0.162594	Negative selection
289	Lus10022492	VIT_204s0023g01130.1	0.344475	1.87672	0.183552	Negative selection
290	Lus10021458	VIT_206s0004g02630.1	0.248303	2.62038	0.0947582	Negative selection
291	Lus10021482	VIT_206s0004g02930.1	0.247405	1.58294	0.156294	Negative selection
292	Lus10021403	VIT_206s0061g00860.1	0.389153	1.61213	0.241391	Negative selection
293	Lus10002554	VIT_206s0004g01930.2	0.298912	3.76626	0.0793656	Negative selection
294	Lus10035857	VIT_207s0031g01490.1	0.168647	1.12158	0.150366	Negative selection
295	Lus10008163	VIT_207s0104g00630.1	0.131053	1.90915	0.068645	Negative selection
296	Lus10035857	VIT_207s0031g01490.1	0.168647	1.12158	0.150366	Negative selection
297	Lus10039001	VIT_208s0040g01020.1	0.301912	2.0793	0.145199	Negative selection
298	Lus10007293	VIT_210s0003g01500.1	0.448907	2.05498	0.218449	Negative selection
299	Lus10007296	VIT_210s0003g01560.1	0.0928574	1.592	0.0583277	Negative selection
300	Lus10037928	VIT_213s0019g05390.1	0.149445	1.2344	0.121067	Negative selection
301	Lus10002679	VIT_215s0048g02590.1	0.256137	1.45153	0.17646	Negative selection
302	Lus10041359	VIT_215s0048g02030.1	0.306429	2.51278	0.121948	Negative selection
303	Lus10005127	VIT_215s0046g02210.1	0.413648	1.73153	0.238891	Negative selection
304	Lus10040914	VIT_215s0046g01030.1	0.141163	2.24795	0.0627966	Negative selection
305	Lus10041134	VIT_218s0001g06670.1	0.61579	2.24304	0.274534	Negative selection
306	Lus10022567	VIT_219s0015g01000.1	0.226563	NaN	NaN	NaN
307	Lus10041244	VIT_205s0020g02320.5	0.223651	1.37368	0.162812	Negative selection
308	Lus10041156	VIT_205s0049g00150.1	0.341699	2.27312	0.150322	Negative selection
309	Lus10041300	VIT_206s0004g02970.1	0.295597	1.55914	0.189591	Negative selection
310	Lus10041301	VIT_206s0004g02930.1	0.289155	1.78456	0.162031	Negative selection
311	Lus10041321	VIT_206s0004g02630.1	0.29631	1.84234	0.160833	Negative selection
312	Lus10010011	VIT_207s0005g01360.1	0.310957	1.57382	0.197581	Negative selection
313	Lus10012745	VIT_207s0191g00230.1	0.560766	NaN	NaN	NaN
314	Lus10029292	VIT_208s0007g06660.2	0.286922	3.41392	0.0840447	Negative selection

## Sheet: Flax_Rice
Table S4. Orthologous relationships of RING finger genes between flax and other four plant species.
NO.	Flax RING ID	Rice RING ID	Ka	Ks	Ka/Ks	Selection pressure
1	Lus10022743	LOC_Os11g02424.1	0.516917	1.5752	0.32816	Negative selection
2	Lus10022743	LOC_Os12g02350.1	0.452812	1.50339	0.301194	Negative selection
3	Lus10018110	LOC_Os02g19140.1	0.145413	3.47356	0.0418629	Negative selection
4	Lus10029178	LOC_Os02g50930.1	0.451455	NaN	NaN	NaN
5	Lus10027027	LOC_Os04g41470.1	0.20676	NaN	NaN	NaN
6	Lus10022743	LOC_Os05g40020.1	0.549386	1.97794	0.277756	Negative selection
7	Lus10029178	LOC_Os06g12680.1	0.439818	NaN	NaN	NaN
8	Lus10029178	LOC_Os09g20980.1	0.625393	NaN	NaN	NaN
9	Lus10027027	LOC_Os09g33876.1	0.28131	3.19805	0.0879631	Negative selection
10	Lus10012819	LOC_Os07g43740.1	0.564847	2.55505	0.221071	Negative selection
11	Lus10029245	LOC_Os01g54620.1	0.157304	NaN	NaN	NaN
12	Lus10029242	LOC_Os01g53130.2	0.434484	NaN	NaN	NaN
13	Lus10037162	LOC_Os02g51030.1	0.527931	2.14096	0.246586	Negative selection
14	Lus10040829	LOC_Os03g16780.1	0.352714	NaN	NaN	NaN
15	Lus10040783	LOC_Os05g01940.1	0.351398	NaN	NaN	NaN
16	Lus10040829	LOC_Os05g02130.1	0.289282	NaN	NaN	NaN
17	Lus10040716	LOC_Os05g37900.1	0.525901	3.18993	0.164863	Negative selection
18	Lus10029037	LOC_Os01g60730.2	0.446281	1.87368	0.238184	Negative selection
19	Lus10012987	LOC_Os02g50930.1	0.446905	NaN	NaN	NaN
20	Lus10041907	LOC_Os09g36530.1	0.473064	NaN	NaN	NaN
21	Lus10028406	LOC_Os09g37050.1	0.612685	NaN	NaN	NaN
22	Lus10024372	LOC_Os01g74040.1	0.568382	1.46835	0.38709	Negative selection
23	Lus10024372	LOC_Os03g16480.1	0.544444	2.09699	0.259631	Negative selection
24	Lus10000023	LOC_Os05g01940.1	0.421837	2.32365	0.181541	Negative selection
25	Lus10017383	LOC_Os10g34590.1	0.387414	NaN	NaN	NaN
26	Lus10015503	LOC_Os02g54860.1	0.27841	NaN	NaN	NaN
27	Lus10040278	LOC_Os03g16480.1	0.329385	1.36526	0.241262	Negative selection
28	Lus10040240	LOC_Os05g37900.1	0.467861	NaN	NaN	NaN
29	Lus10002113	LOC_Os12g39110.1	0.836509	1.68727	0.495776	Negative selection
30	Lus10000908	LOC_Os04g50720.1	0.493588	NaN	NaN	NaN
31	Lus10010179	LOC_Os10g34590.1	0.479851	2.11446	0.226938	Negative selection
32	Lus10028249	LOC_Os05g37900.1	0.478111	NaN	NaN	NaN
33	Lus10027441	LOC_Os10g37730.1	0.288832	NaN	NaN	NaN
34	Lus10022895	LOC_Os04g43300.1	0.545225	2.57343	0.211866	Negative selection
35	Lus10038180	LOC_Os08g41520.1	0.899758	NaN	NaN	NaN
36	Lus10019974	LOC_Os02g54860.1	0.278481	NaN	NaN	NaN
37	Lus10016561	LOC_Os03g16780.1	0.359395	NaN	NaN	NaN
38	Lus10011405	LOC_Os01g68060.1	0.295208	2.61668	0.112818	Negative selection
39	Lus10011390	LOC_Os01g67850.1	0.309354	NaN	NaN	NaN
40	Lus10007296	LOC_Os01g54620.1	0.157703	NaN	NaN	NaN
41	Lus10007293	LOC_Os05g11720.1	0.575161	NaN	NaN	NaN
42	Lus10012745	LOC_Os09g29370.1	0.821278	NaN	NaN	NaN
