# Supplementary material for: Genome-wide identification of RING finger genes in flax (Linum usitatissimum) and analyses of their evolution
Source: PeerJ. 2021 Nov 15;9:e12491. doi: 10.7717/peerj.12491 (PMC8601054; doi:10.7717/peerj.12491)
Supplement: Supplemental Information 16 [file peerj-09-12491-s016.xlsx]

## Sheet: Sheet1
Table S5. FPKM transcription count data for 505 flax RING finger genes during seed developmental stages
Gene	DAP5	DAP10	DAP20	DAP30
Lus10000023	21.5	18.5	41.5	71
Lus10000333	59.5	53.5	65.5	41.5
Lus10000412	10	6	7	10
Lus10000487	0	0.5	0	0
Lus10000513	608.5	157.5	99	15.5
Lus10000533	865.5	385	637.5	859.5
Lus10000710	4.5	6	2	0.5
Lus10000845	239.5	39.5	6.5	7.5
Lus10000885	0.5	0	0	0
Lus10000899	1199	521	676.5	544.5
Lus10000908	410	143.5	298.5	258.5
Lus10000996	698.5	341	420	306
Lus10001131	286	153.5	401	607
Lus10001209	444.5	203.5	764.5	1003
Lus10001421	496.5	231	90.5	128.5
Lus10001530	4645	968.5	2842	4476.5
Lus10001535	0	0	0	0
Lus10001568	457	570.5	939.5	482
Lus10001582	85.5	69.5	97.5	6
Lus10001611	5	2.5	1	1
Lus10001654	879	231	375.5	974
Lus10001683	357.5	91	172	40.5
Lus10001685	19.5	22.5	4	2
Lus10002051	260.5	51	117.5	73.5
Lus10002131	568.5	203	118.5	96
Lus10002194	2	0	6.5	0
Lus10002282	446.5	145	12	1
Lus10002316	309.5	52.5	144.5	278.5
Lus10002369	634.5	304	639.5	447.5
Lus10002391	1054.5	300.5	619.5	442
Lus10002487	911	187	73.5	39.5
Lus10002491	1287.5	671.5	1241	387.5
Lus10002584	377	240	330	572.5
Lus10002637	0	0	0	0
Lus10002639	949.5	636.5	1466	3294.5
Lus10002679	1709	626	1197	478.5
Lus10002706	874.5	240.5	206	66
Lus10002939	3529.5	1003.5	192	55
Lus10002940	1051.5	313	91	26.5
Lus10003261	251.5	255.5	301.5	414.5
Lus10003400	1.5	0	0	0
Lus10003485	79	33	6	18.5
Lus10003525	419.5	240	34	9
Lus10003526	2995	849.5	280	62.5
Lus10003551	0.5	0	0	0.5
Lus10003617	3	2	0	0
Lus10003992	8	0.5	2.5	4.5
Lus10004058	527	259	34	6.5
Lus10004419	463.5	67.5	243.5	150.5
Lus10004460	68.5	50	38	28
Lus10004521	821	329	788	1417
Lus10004557	839	351.5	356	249.5
Lus10004568	17.5	6.5	12.5	13.5
Lus10004572	2	0.5	1	4.5
Lus10004636	0	0	0	0
Lus10004712	473	244.5	67	90.5
Lus10004813	782.5	200	110	107.5
Lus10004821	641.5	1036.5	1028.5	380.5
Lus10004977	824	883	711.5	314
Lus10005084	1043.5	546	592	461
Lus10005111	1161.5	495	1007	439
Lus10005237	1.5	0	0	0
Lus10005389	12	11	50.5	50.5
Lus10005617	69.5	11	20	1
Lus10005754	532	228.5	915.5	3091
Lus10005814	1.5	0	0	0
Lus10005815	0.5	0	0	1
Lus10005816	1	0.5	0	0
Lus10005817	15.5	0	0	0
Lus10005818	0.5	1.5	0	0
Lus10005859	154	74	537.5	968.5
Lus10006074	411	182.5	385	345
Lus10006161	4658	1780.5	323.5	218
Lus10006279	6.5	36.5	62.5	11.5
Lus10006378	1424	578	768.5	319.5
Lus10006447	547.5	196	195.5	89.5
Lus10006448	107	20	1	0
Lus10006449	0.5	0	0	0
Lus10006463	27.5	5	5.5	7.5
Lus10006493	73.5	75	411.5	949
Lus10006558	140.5	108	66	111.5
Lus10006651	718	243	367.5	357.5
Lus10006741	320	113.5	100	80.5
Lus10006785	27	0	0	0.5
Lus10006786	11.5	1	0	0
Lus10006787	6	0	8.5	1
Lus10006788	0	0.5	1	0
Lus10006832	474.5	309.5	403	483
Lus10007106	217.5	84	124.5	108
Lus10007293	8.5	3.5	5	6.5
Lus10007296	4817.5	1102.5	166	254
Lus10007538	10552.5	2695.5	1295	1408.5
Lus10007628	0.5	1.5	0	0.5
Lus10007703	0.5	0	0	0
Lus10007867	13	7	47.5	5.5
Lus10007936	108.5	80.5	233.5	364.5
Lus10007937	24	9	21.5	25
Lus10007967	434.5	149.5	326.5	160
Lus10008046	222	148	184.5	269
Lus10008163	587.5	417.5	404	305
Lus10008225	2243	408.5	16.5	9
Lus10008235	7	4.5	0	0
Lus10008283	0	1.5	0.5	0
Lus10008286	325	169.5	320	768.5
Lus10008447	1270.5	432.5	1051	775
Lus10008458	0	0	0	0.5
Lus10008628	2465	437.5	45	26.5
Lus10008797	1.5	0	0	0
Lus10008874	823.5	374	420.5	394
Lus10008972	0	0	0	0.5
Lus10009035	1102	532	556	458.5
Lus10009326	0	0.5	0	0
Lus10009438	665	287.5	291.5	352.5
Lus10009511	8	1	1	0
Lus10009529	438	265	263.5	223
Lus10009674	1737	678.5	1299	1579
Lus10009695	511.5	168	1557.5	947.5
Lus10009773	370	141.5	440	386.5
Lus10009810	938.5	652	1902.5	2510.5
Lus10009832	10.5	9	0	0
Lus10010011	801	423.5	974.5	911.5
Lus10010069	900	508	1939.5	2836.5
Lus10010372	1579	591.5	785	1031
Lus10010392	128	35	25	0
Lus10010513	585.5	302.5	130	117
Lus10010791	88.5	53	61.5	16.5
Lus10011184	51.5	28	16	4
Lus10011309	472.5	157.5	344.5	144
Lus10011380	0	0	0	0
Lus10011390	521	265	142.5	153.5
Lus10011391	199.5	124.5	64	26.5
Lus10011392	3	0	15	7
Lus10011416	161	282.5	3579	1790.5
Lus10011475	779.5	403.5	350	103.5
Lus10011702	28.5	25	0	0
Lus10012033	76	21.5	15.5	33
Lus10012198	4120	1190	937	1730
Lus10012290	955.5	361.5	2176	1158
Lus10012332	958.5	339.5	510.5	233
Lus10012365	579.5	218.5	155	197
Lus10012376	1.5	0	0	0
Lus10012628	4	0	3.5	9
Lus10012745	221.5	152.5	219	72
Lus10012791	391.5	262.5	148	135
Lus10012793	349.5	94.5	49.5	31.5
Lus10012811	1579.5	781.5	625.5	200.5
Lus10012819	18.5	20	69	439
Lus10012826	201	76.5	114	129
Lus10012867	515	2217.5	2330.5	2591.5
Lus10012975	5.5	3	4	1
Lus10012987	72	103	10.5	19
Lus10013027	847.5	366	233	64
Lus10013144	726.5	351	755	560.5
Lus10013210	97	28	266.5	985
Lus10013371	27.5	25.5	10	0.5
Lus10013374	1124.5	533	1213	1065
Lus10013475	172.5	113	189.5	255.5
Lus10013491	193.5	105.5	69	45
Lus10013497	519.5	130	178	126
Lus10013606	707.5	175	234.5	330.5
Lus10013618	10.5	1.5	3	2
Lus10013739	324	220.5	78.5	20.5
Lus10013821	113	30	36	33
Lus10014118	4.5	3.5	4	0
Lus10014366	249.5	139	721.5	563.5
Lus10014526	359.5	141	81.5	134.5
Lus10014749	156.5	136.5	170.5	161
Lus10014823	1401	604.5	1006	638
Lus10015046	5.5	0.5	0	3.5
Lus10015080	533.5	228.5	388.5	927.5
Lus10015126	313.5	130	322	314.5
Lus10015152	0.5	0	0.5	0
Lus10015167	6.5	4.5	8.5	21
Lus10015213	45.5	14.5	36	40
Lus10015260	1810.5	897.5	1726.5	1965.5
Lus10015273	2547.5	892	694.5	329.5
Lus10015502	19	3.5	1	0
Lus10015503	376	255	286	196
Lus10015506	104.5	88.5	131	193
Lus10015722	850.5	381.5	425.5	495
Lus10015732	27	11	78	17
Lus10015837	0	0	0	0
Lus10015901	96.5	50.5	59	3
Lus10015986	1106	398.5	3937.5	1534
Lus10016040	42	6.5	35.5	12.5
Lus10016102	369	67.5	111.5	59
Lus10016163	27	77	241	54
Lus10016195	95	21	0	0
Lus10016303	32	12	30.5	11.5
Lus10016416	224.5	100.5	24	8.5
Lus10016426	579.5	457.5	304	399.5
Lus10016427	24.5	5	0.5	0
Lus10016428	0.5	0.5	1	0
Lus10016451	55.5	94.5	52	19
Lus10016541	0.5	0	0.5	0
Lus10016561	3255	1053	248.5	150
Lus10016796	138	81	40.5	25
Lus10016817	732	185	635	319
Lus10016924	1.5	1	0	0
Lus10016936	987	274	292	230.5
Lus10017092	1381.5	509.5	730	652.5
Lus10017197	106.5	110	41.5	93.5
Lus10017253	6.5	6	0.5	1
Lus10017455	157.5	61.5	111	172
Lus10017510	23	31.5	39.5	3
Lus10017722	0	0	0	0.5
Lus10017750	233	73	69	37
Lus10017764	380	159	485	467
Lus10017788	260.5	110.5	449	553
Lus10017865	503.5	225	295.5	389.5
Lus10017969	1637.5	408.5	261.5	220.5
Lus10018110	496	320.5	257.5	248
Lus10018125	3059	1065.5	2136.5	1871
Lus10018140	1.5	0	4.5	0
Lus10018167	368	411.5	678.5	600.5
Lus10018271	23.5	0	0	0
Lus10018292	690	220	55	1
Lus10018294	763.5	464.5	450	625.5
Lus10018409	133.5	66.5	97	199
Lus10018465	912.5	385.5	787.5	842
Lus10018609	245.5	121.5	169.5	181
Lus10018613	804.5	191	309.5	268
Lus10018817	203	34	16.5	11.5
Lus10019018	22	3	13	22.5
Lus10019075	513	250	312.5	378.5
Lus10019102	667.5	337.5	594	611.5
Lus10019507	91.5	79.5	53	104.5
Lus10019685	3	2	0.5	0
Lus10019686	24.5	9	3.5	0
Lus10019687	700	446.5	330	221.5
Lus10019703	151.5	58	19.5	11.5
Lus10019790	38	3	3	4.5
Lus10019839	2244	1052.5	869	1209.5
Lus10019973	147.5	3	1	2.5
Lus10019974	908	383.5	921	275.5
Lus10019979	143	180	437	703
Lus10020007	184	83.5	344.5	517
Lus10020033	1641	279	106	35
Lus10020084	207	79.5	80.5	47
Lus10020145	450.5	371.5	711.5	356.5
Lus10020256	431	213	276	470.5
Lus10020258	672	293.5	487.5	776
Lus10020349	205.5	81	219	175
Lus10020655	498.5	148.5	120.5	157
Lus10020859	4	0	0	0
Lus10020903	892.5	606	264	229.5
Lus10021063	99	44	35	16
Lus10021113	132	89.5	73	84.5
Lus10021197	97.5	29.5	2	1
Lus10021245	645.5	227.5	127.5	67.5
Lus10021403	804.5	489.5	475	406.5
Lus10021458	1021	129	86.5	30.5
Lus10021524	34	27	83.5	98.5
Lus10021628	243	74	222	246.5
Lus10021670	643	244	670.5	574.5
Lus10021683	612.5	234	316.5	381
Lus10021710	418	363.5	109	91
Lus10021722	154	101	67.5	27.5
Lus10021801	411	260	297	449.5
Lus10021842	2.5	1	0	0
Lus10021953	490	242	301.5	165.5
Lus10021954	784.5	247	379	449
Lus10021993	15.5	4.5	9.5	0
Lus10022223	0	0	0	0
Lus10022294	225	220.5	65.5	18.5
Lus10022324	138.5	29	1	0
Lus10022405	605.5	396.5	557	572.5
Lus10022449	40.5	8	0	0
Lus10022567	885	248	43.5	25
Lus10022585	1194.5	207	378	44
Lus10022743	516.5	199.5	23.5	28
Lus10022774	956	310.5	769	1064
Lus10022895	288	62.5	5.5	22.5
Lus10022967	9.5	1	0	0
Lus10023055	290.5	38.5	7.5	0
Lus10023068	1700.5	557.5	973	647
Lus10023112	414	180	252	93
Lus10023162	1664.5	708	537.5	652.5
Lus10023182	601	271.5	383.5	804
Lus10023235	601.5	193.5	288	218
Lus10023477	2012	740	560	404.5
Lus10023507	1738	674.5	1007	814.5
Lus10023527	85.5	47.5	80	281
Lus10023617	10.5	23.5	2.5	2
Lus10023671	753	218.5	400.5	321
Lus10023914	566.5	122	234.5	279.5
Lus10024057	469	177	410	473.5
Lus10024124	9	1.5	2.5	5.5
Lus10024135	571	191	390	395
Lus10024372	792.5	431	498.5	379.5
Lus10024405	0	0	1.5	0.5
Lus10024629	0	0	0	0
Lus10024635	303.5	168.5	721.5	718.5
Lus10024657	315.5	68	13.5	3
Lus10024759	328	107	204	224
Lus10024810	1152.5	411.5	611.5	272.5
Lus10024881	7.5	10.5	0.5	0
Lus10025031	147	54	135	71.5
Lus10025145	195	8	2	2
Lus10025146	227.5	71	126.5	54.5
Lus10025162	44.5	8.5	10.5	9
Lus10025228	120.5	5	0	1.5
Lus10025338	0	0	0	0
Lus10025394	28	20	12.5	2.5
Lus10025563	6	8	0	0
Lus10025566	2112.5	1063	1510.5	2072
Lus10025612	17.5	3.5	3.5	4
Lus10025671	22	8.5	21.5	8
Lus10025691	1.5	0	12	0
Lus10025921	0.5	0.5	5.5	7.5
Lus10025930	310	134	821.5	503
Lus10026104	170	96	110.5	238.5
Lus10026226	652	468.5	356	229.5
Lus10026380	789	564	710.5	800
Lus10026420	1344.5	452.5	2319.5	2718.5
Lus10026501	2128	156	755.5	101
Lus10026648	2.5	1	1	1
Lus10026941	278	204	699	467
Lus10027023	0	3	3	1.5
Lus10027027	1261.5	515.5	838.5	923.5
Lus10027441	261.5	109.5	271.5	665
Lus10027736	6	0.5	0	0.5
Lus10027744	10.5	32.5	3.5	5
Lus10027890	324.5	66	183	197.5
Lus10027921	1198.5	377.5	1437.5	1326.5
Lus10027994	545	212.5	429	360.5
Lus10028009	0.5	0	0	0
Lus10028063	2	0.5	0.5	1
Lus10028249	173.5	135.5	10.5	3.5
Lus10028406	483.5	188	155.5	101.5
Lus10028454	33.5	17.5	6.5	9.5
Lus10028560	548.5	219.5	63	15.5
Lus10028597	9875	3305.5	1247	1782
Lus10028773	1	1.5	2.5	2
Lus10028790	1111.5	563.5	113.5	84
Lus10029037	0.5	0	0.5	0
Lus10029136	679	272.5	81.5	34
Lus10029178	158	131.5	43	24.5
Lus10029242	22	13.5	17.5	12
Lus10029292	21	48.5	85	10
Lus10029351	21.5	3.5	0.5	0.5
Lus10029456	1	20	2.5	4.5
Lus10029582	969.5	389	968	1021
Lus10029693	8.5	2	4	0.5
Lus10029794	0	0	0	0
Lus10029886	760	266.5	207.5	240
Lus10029940	284	73.5	89	10.5
Lus10029990	1042	440	352	262
Lus10029993	0.5	0.5	3	0.5
Lus10030117	424	211	233.5	109
Lus10030120	104	45.5	0	0.5
Lus10030199	5778	2848.5	3155	3539
Lus10030375	883.5	188.5	209	135
Lus10030464	9	7.5	26	121
Lus10030472	245	147	126	131
Lus10030512	47.5	24.5	17.5	16.5
Lus10030597	251.5	69	81	39.5
Lus10030728	140	69.5	299.5	1023
Lus10030891	513	174	253	196
Lus10030972	0	0	0	0
Lus10031152	1707	620	839	716
Lus10031202	1832.5	950	337.5	260.5
Lus10031275	111	156.5	27	6
Lus10031468	67	17	46.5	45.5
Lus10031491	455	179	138	105
Lus10031515	48.5	29	43.5	2.5
Lus10031549	250.5	90	93	100
Lus10031618	1402	395.5	441	267
Lus10031728	1328	446.5	555	594.5
Lus10031780	487	153	19	6.5
Lus10032119	102.5	26.5	15.5	14.5
Lus10032161	521.5	186.5	251.5	130
Lus10032265	0	0	0	0
Lus10032270	625	234.5	826.5	482
Lus10032290	203	39.5	17	3.5
Lus10032382	5	1.5	7.5	0.5
Lus10032402	1468.5	571	1223.5	1185.5
Lus10032418	136	33	5	0.5
Lus10032471	1105	661.5	571	471
Lus10033053	802.5	340	889.5	639
Lus10033075	151.5	47	157	166
Lus10033252	174	92.5	275.5	629.5
Lus10033425	0.5	0	0.5	0
Lus10033515	12	0	0.5	0
Lus10033682	0.5	0	0	0
Lus10033725	1905.5	467	769.5	418.5
Lus10033860	209	164.5	148	79
Lus10033969	376.5	227	300	30.5
Lus10033985	630	350.5	326.5	373.5
Lus10034030	347.5	105	354	435
Lus10034049	572.5	212.5	164.5	164.5
Lus10034088	1547.5	1071.5	1116	1117
Lus10034153	3	0	0	0
Lus10034157	255.5	88.5	26	6
Lus10034346	1705.5	523.5	1155	544.5
Lus10034367	846	505.5	372.5	394
Lus10034407	35.5	9	159.5	107
Lus10034454	607	266	360	307.5
Lus10034470	1897.5	513	1145.5	1016
Lus10034551	11	0.5	29	18.5
Lus10034587	643.5	289.5	545	1133
Lus10034640	136	134	361	173
Lus10034644	122	95.5	256	53
Lus10034667	558	248	272	279
Lus10034793	2.5	1	1	0
Lus10034832	1212.5	524.5	546	529
Lus10034953	14.5	1.5	0	0.5
Lus10035010	717	275.5	421	273
Lus10035023	564	230	295	284
Lus10035057	316	206	378	105
Lus10035271	122	149	280.5	78.5
Lus10035332	573	363	318	259.5
Lus10035335	10.5	20.5	0.5	1
Lus10035368	0.5	0.5	0	0
Lus10035549	0.5	5	0.5	0.5
Lus10035553	1429.5	870.5	1131	1462.5
Lus10035677	25.5	5.5	31.5	59
Lus10035820	9	4.5	63.5	63.5
Lus10035857	820	231	681	423.5
Lus10035931	1	0	0	0
Lus10036034	573.5	234	3381.5	2260
Lus10036127	269.5	170.5	98.5	121.5
Lus10036128	96	64	118.5	89.5
Lus10036138	3198	1282.5	1865.5	1994.5
Lus10036151	404.5	75.5	103.5	130
Lus10036378	91.5	46	25.5	20
Lus10036380	0	0	0	0
Lus10036404	52.5	14	8.5	10
Lus10036466	1	1	0	0
Lus10036754	328	115	54.5	12
Lus10036757	23	11	107.5	142.5
Lus10036764	242	65.5	42.5	22.5
Lus10036934	129.5	84.5	697	382
Lus10036937	558.5	245	283	239.5
Lus10037053	219	168	806	426
Lus10037162	1340.5	1178.5	162.5	124.5
Lus10037172	434.5	210.5	193	92
Lus10037264	59.5	17	37	56.5
Lus10037391	23	11	6.5	2
Lus10037410	215.5	97.5	48	9
Lus10037490	27.5	8.5	11	17
Lus10037580	509.5	333	536.5	685
Lus10037812	1197.5	345.5	366.5	346.5
Lus10037906	81.5	22	54.5	57.5
Lus10037928	472	162	348	226
Lus10038048	1428	570	985.5	784.5
Lus10038095	842	296	385	291.5
Lus10038169	394	235	459.5	208
Lus10038180	3	0	0	0
Lus10038341	3710	2137	1399.5	1021
Lus10038632	91.5	6.5	51.5	39
Lus10038656	811	266	335	256.5
Lus10038731	740.5	622.5	105.5	205.5
Lus10039001	758	367.5	889	1002
Lus10039127	555.5	551	75.5	137
Lus10039202	307	175	78	33
Lus10039607	3186	936	955.5	522
Lus10039634	452	167.5	103	198.5
Lus10039845	290.5	120.5	244.5	276.5
Lus10039848	2040	360.5	216	102
Lus10040151	0.5	0	0	0
Lus10040240	257	75	29.5	8
Lus10040278	404.5	198	123	89
Lus10040359	1942.5	824	814	422.5
Lus10040389	1112.5	563.5	688.5	678.5
Lus10040413	177.5	73	116.5	324.5
Lus10040508	362	113	130	69.5
Lus10040613	379.5	529	679.5	592
Lus10040616	111.5	106	83	11
Lus10040617	282	79.5	0	0.5
Lus10040716	87.5	131	49	15.5
Lus10040783	284	372	635.5	1674.5
Lus10040829	2021	503.5	99	108
Lus10040914	702	393.5	1455.5	1041.5
Lus10040942	315	134	6.5	7
Lus10041008	1095.5	423.5	396.5	230
Lus10041063	4187	1716.5	810.5	356
Lus10041079	28.5	8	12.5	1.5
Lus10041134	0.5	0	0	0
Lus10041156	259.5	22.5	3.5	1
Lus10041244	1650.5	546.5	691.5	504
Lus10041246	623	262	349	425.5
Lus10041300	892.5	311.5	588	831.5
Lus10041301	1514	701	1853.5	2419.5
Lus10041321	38.5	16.5	7.5	19
Lus10041359	931	383.5	431	311.5
Lus10041603	2667	938.5	1212.5	1280
Lus10041689	1288.5	418	1206.5	622
Lus10041859	817.5	142	157	195.5
Lus10041896	478.5	409	887	915.5
Lus10041907	101	24	39.5	17
Lus10042156	890.5	445	938.5	895
Lus10042171	0	0	0.5	0
Lus10042188	5	0.5	3	1
Lus10042190	498	272	64.5	52.5
Lus10042277	2	5	2	2.5
Lus10042443	504	386	244.5	147.5
Lus10042532	19.5	1	0.5	0.5
Lus10042890	1796.5	856	2227	1674
Lus10042969	757	320.5	448	312
Lus10043027	3.5	1	29.5	1.5
Lus10043353	66	95	71.5	330
Lus10043365	356	88.5	234	255
Lus10043426	748.5	465.5	122.5	53.5
Lus10043428	464	110	538	209.5

## Sheet: Sheet2
Table S5. FPKM transcription count data for 505 flax RING finger genes during seed developmental stages
Gene	L09:DAP5	L13:DAP5	DAP5	L10:DAP10	L14:DAP10	DAP10	L11:DAP20	L15:DAP20	DAP20	L12:DAP30	L16:DAP30	DAP30
Lus10000023	26	17	21.5	21	16	18.5	44	39	41.5	94	48	71
Lus10000333	48	71	59.5	60	47	53.5	95	36	65.5	57	26	41.5
Lus10000412	10	10	10	11	1	6	1	13	7	6	14	10
Lus10000487	0	0	0	0	1	0.5	0	0	0	0	0	0
Lus10000513	657	560	608.5	173	142	157.5	127	71	99	17	14	15.5
Lus10000533	743	988	865.5	407	363	385	619	656	637.5	953	766	859.5
Lus10000710	4	5	4.5	4	8	6	2	2	2	0	1	0.5
Lus10000845	171	308	239.5	38	41	39.5	4	9	6.5	10	5	7.5
Lus10000885	1	0	0.5	0	0	0	0	0	0	0	0	0
Lus10000899	1262	1136	1199	566	476	521	638	715	676.5	639	450	544.5
Lus10000908	398	422	410	160	127	143.5	352	245	298.5	277	240	258.5
Lus10000996	660	737	698.5	374	308	341	470	370	420	344	268	306
Lus10001131	300	272	286	156	151	153.5	392	410	401	684	530	607
Lus10001209	391	498	444.5	234	173	203.5	555	974	764.5	1221	785	1003
Lus10001421	479	514	496.5	238	224	231	103	78	90.5	146	111	128.5
Lus10001530	3181	6109	4645	1284	653	968.5	3267	2417	2842	5834	3119	4476.5
Lus10001535	0	0	0	0	0	0	0	0	0	0	0	0
Lus10001568	622	292	457	610	531	570.5	722	1157	939.5	554	410	482
Lus10001582	107	64	85.5	68	71	69.5	80	115	97.5	1	11	6
Lus10001611	8	2	5	5	0	2.5	2	0	1	2	0	1
Lus10001654	911	847	879	241	221	231	345	406	375.5	1059	889	974
Lus10001683	321	394	357.5	107	75	91	192	152	172	60	21	40.5
Lus10001685	20	19	19.5	25	20	22.5	0	8	4	0	4	2
Lus10002051	245	276	260.5	67	35	51	116	119	117.5	94	53	73.5
Lus10002131	510	627	568.5	226	180	203	133	104	118.5	119	73	96
Lus10002194	2	2	2	0	0	0	8	5	6.5	0	0	0
Lus10002282	482	411	446.5	176	114	145	19	5	12	0	2	1
Lus10002316	265	354	309.5	63	42	52.5	163	126	144.5	358	199	278.5
Lus10002369	606	663	634.5	326	282	304	483	796	639.5	487	408	447.5
Lus10002391	870	1239	1054.5	332	269	300.5	697	542	619.5	590	294	442
Lus10002487	848	974	911	204	170	187	95	52	73.5	32	47	39.5
Lus10002491	1347	1228	1287.5	757	586	671.5	1163	1319	1241	456	319	387.5
Lus10002584	386	368	377	239	241	240	406	254	330	638	507	572.5
Lus10002637	0	0	0	0	0	0	0	0	0	0	0	0
Lus10002639	913	986	949.5	704	569	636.5	1604	1328	1466	3790	2799	3294.5
Lus10002679	1544	1874	1709	718	534	626	1274	1120	1197	607	350	478.5
Lus10002706	827	922	874.5	286	195	240.5	217	195	206	89	43	66
Lus10002939	3466	3593	3529.5	1186	821	1003.5	286	98	192	71	39	55
Lus10002940	1012	1091	1051.5	342	284	313	128	54	91	36	17	26.5
Lus10003261	216	287	251.5	289	222	255.5	314	289	301.5	515	314	414.5
Lus10003400	2	1	1.5	0	0	0	0	0	0	0	0	0
Lus10003485	68	90	79	26	40	33	11	1	6	21	16	18.5
Lus10003525	346	493	419.5	247	233	240	44	24	34	8	10	9
Lus10003526	2473	3517	2995	825	874	849.5	408	152	280	84	41	62.5
Lus10003551	1	0	0.5	0	0	0	0	0	0	1	0	0.5
Lus10003617	2	4	3	4	0	2	0	0	0	0	0	0
Lus10003992	8	8	8	1	0	0.5	2	3	2.5	5	4	4.5
Lus10004058	575	479	527	295	223	259	47	21	34	4	9	6.5
Lus10004419	546	381	463.5	95	40	67.5	330	157	243.5	199	102	150.5
Lus10004460	66	71	68.5	55	45	50	39	37	38	23	33	28
Lus10004521	745	897	821	357	301	329	847	729	788	1553	1281	1417
Lus10004557	907	771	839	390	313	351.5	340	372	356	306	193	249.5
Lus10004568	16	19	17.5	7	6	6.5	14	11	12.5	18	9	13.5
Lus10004572	2	2	2	1	0	0.5	2	0	1	9	0	4.5
Lus10004636	0	0	0	0	0	0	0	0	0	0	0	0
Lus10004712	479	467	473	258	231	244.5	114	20	67	121	60	90.5
Lus10004813	621	944	782.5	187	213	200	119	101	110	123	92	107.5
Lus10004821	651	632	641.5	1174	899	1036.5	1226	831	1028.5	441	320	380.5
Lus10004977	1245	403	824	895	871	883	464	959	711.5	339	289	314
Lus10005084	1083	1004	1043.5	538	554	546	587	597	592	536	386	461
Lus10005111	1091	1232	1161.5	573	417	495	1303	711	1007	529	349	439
Lus10005237	2	1	1.5	0	0	0	0	0	0	0	0	0
Lus10005389	13	11	12	6	16	11	35	66	50.5	61	40	50.5
Lus10005617	50	89	69.5	15	7	11	38	2	20	2	0	1
Lus10005754	444	620	532	233	224	228.5	1020	811	915.5	3380	2802	3091
Lus10005814	3	0	1.5	0	0	0	0	0	0	0	0	0
Lus10005815	0	1	0.5	0	0	0	0	0	0	2	0	1
Lus10005816	2	0	1	0	1	0.5	0	0	0	0	0	0
Lus10005817	17	14	15.5	0	0	0	0	0	0	0	0	0
Lus10005818	1	0	0.5	2	1	1.5	0	0	0	0	0	0
Lus10005859	150	158	154	84	64	74	328	747	537.5	1251	686	968.5
Lus10006074	339	483	411	196	169	182.5	428	342	385	389	301	345
Lus10006161	4232	5084	4658	1997	1564	1780.5	425	222	323.5	277	159	218
Lus10006279	6	7	6.5	41	32	36.5	54	71	62.5	9	14	11.5
Lus10006378	1325	1523	1424	650	506	578	932	605	768.5	400	239	319.5
Lus10006447	620	475	547.5	216	176	196	245	146	195.5	98	81	89.5
Lus10006448	106	108	107	28	12	20	0	2	1	0	0	0
Lus10006449	0	1	0.5	0	0	0	0	0	0	0	0	0
Lus10006463	32	23	27.5	4	6	5	2	9	5.5	10	5	7.5
Lus10006493	79	68	73.5	87	63	75	375	448	411.5	978	920	949
Lus10006558	124	157	140.5	130	86	108	72	60	66	125	98	111.5
Lus10006651	660	776	718	264	222	243	502	233	367.5	437	278	357.5
Lus10006741	279	361	320	147	80	113.5	91	109	100	99	62	80.5
Lus10006785	25	29	27	0	0	0	0	0	0	0	1	0.5
Lus10006786	10	13	11.5	2	0	1	0	0	0	0	0	0
Lus10006787	3	9	6	0	0	0	3	14	8.5	2	0	1
Lus10006788	0	0	0	0	1	0.5	0	2	1	0	0	0
Lus10006832	491	458	474.5	352	267	309.5	407	399	403	573	393	483
Lus10007106	208	227	217.5	89	79	84	101	148	124.5	123	93	108
Lus10007293	10	7	8.5	5	2	3.5	5	5	5	3	10	6.5
Lus10007296	5030	4605	4817.5	1071	1134	1102.5	165	167	166	286	222	254
Lus10007538	8849	12256	10552.5	2810	2581	2695.5	1401	1189	1295	1781	1036	1408.5
Lus10007628	0	1	0.5	2	1	1.5	0	0	0	1	0	0.5
Lus10007703	1	0	0.5	0	0	0	0	0	0	0	0	0
Lus10007867	12	14	13	5	9	7	39	56	47.5	9	2	5.5
Lus10007936	95	122	108.5	90	71	80.5	256	211	233.5	409	320	364.5
Lus10007937	10	38	24	6	12	9	22	21	21.5	35	15	25
Lus10007967	381	488	434.5	176	123	149.5	427	226	326.5	197	123	160
Lus10008046	235	209	222	154	142	148	214	155	184.5	317	221	269
Lus10008163	556	619	587.5	443	392	417.5	358	450	404	330	280	305
Lus10008225	2292	2194	2243	436	381	408.5	25	8	16.5	13	5	9
Lus10008235	5	9	7	9	0	4.5	0	0	0	0	0	0
Lus10008283	0	0	0	0	3	1.5	0	1	0.5	0	0	0
Lus10008286	268	382	325	183	156	169.5	311	329	320	836	701	768.5
Lus10008447	1217	1324	1270.5	469	396	432.5	1094	1008	1051	908	642	775
Lus10008458	0	0	0	0	0	0	0	0	0	0	1	0.5
Lus10008628	2475	2455	2465	533	342	437.5	58	32	45	39	14	26.5
Lus10008797	2	1	1.5	0	0	0	0	0	0	0	0	0
Lus10008874	742	905	823.5	399	349	374	438	403	420.5	481	307	394
Lus10008972	0	0	0	0	0	0	0	0	0	0	1	0.5
Lus10009035	1088	1116	1102	536	528	532	650	462	556	551	366	458.5
Lus10009326	0	0	0	1	0	0.5	0	0	0	0	0	0
Lus10009438	554	776	665	280	295	287.5	338	245	291.5	418	287	352.5
Lus10009511	11	5	8	1	1	1	0	2	1	0	0	0
Lus10009529	429	447	438	285	245	265	258	269	263.5	239	207	223
Lus10009674	1612	1862	1737	714	643	678.5	1303	1295	1299	1839	1319	1579
Lus10009695	536	487	511.5	179	157	168	1340	1775	1557.5	1096	799	947.5
Lus10009773	371	369	370	150	133	141.5	501	379	440	459	314	386.5
Lus10009810	1026	851	938.5	714	590	652	1954	1851	1902.5	2920	2101	2510.5
Lus10009832	14	7	10.5	8	10	9	0	0	0	0	0	0
Lus10010011	781	821	801	453	394	423.5	998	951	974.5	949	874	911.5
Lus10010069	775	1025	900	563	453	508	1850	2029	1939.5	3403	2270	2836.5
Lus10010372	1412	1746	1579	665	518	591.5	995	575	785	1246	816	1031
Lus10010392	112	144	128	41	29	35	26	24	25	0	0	0
Lus10010513	586	585	585.5	308	297	302.5	150	110	130	129	105	117
Lus10010791	101	76	88.5	47	59	53	78	45	61.5	14	19	16.5
Lus10011184	54	49	51.5	25	31	28	17	15	16	3	5	4
Lus10011309	458	487	472.5	167	148	157.5	313	376	344.5	175	113	144
Lus10011380	0	0	0	0	0	0	0	0	0	0	0	0
Lus10011390	530	512	521	288	242	265	177	108	142.5	165	142	153.5
Lus10011391	206	193	199.5	163	86	124.5	90	38	64	27	26	26.5
Lus10011392	3	3	3	0	0	0	12	18	15	6	8	7
Lus10011416	284	38	161	236	329	282.5	2039	5119	3579	1671	1910	1790.5
Lus10011475	836	723	779.5	459	348	403.5	266	434	350	109	98	103.5
Lus10011702	39	18	28.5	26	24	25	0	0	0	0	0	0
Lus10012033	66	86	76	16	27	21.5	16	15	15.5	39	27	33
Lus10012198	3603	4637	4120	1272	1108	1190	995	879	937	2142	1318	1730
Lus10012290	1087	824	955.5	382	341	361.5	1679	2673	2176	1232	1084	1158
Lus10012332	896	1021	958.5	378	301	339.5	624	397	510.5	268	198	233
Lus10012365	546	613	579.5	237	200	218.5	166	144	155	249	145	197
Lus10012376	3	0	1.5	0	0	0	0	0	0	0	0	0
Lus10012628	3	5	4	0	0	0	5	2	3.5	13	5	9
Lus10012745	225	218	221.5	161	144	152.5	325	113	219	67	77	72
Lus10012791	378	405	391.5	289	236	262.5	180	116	148	169	101	135
Lus10012793	403	296	349.5	101	88	94.5	41	58	49.5	37	26	31.5
Lus10012811	1344	1815	1579.5	806	757	781.5	633	618	625.5	158	243	200.5
Lus10012819	24	13	18.5	26	14	20	88	50	69	593	285	439
Lus10012826	142	260	201	82	71	76.5	133	95	114	132	126	129
Lus10012867	342	688	515	2778	1657	2217.5	2675	1986	2330.5	3261	1922	2591.5
Lus10012975	2	9	5.5	5	1	3	6	2	4	1	1	1
Lus10012987	58	86	72	112	94	103	3	18	10.5	10	28	19
Lus10013027	811	884	847.5	392	340	366	297	169	233	68	60	64
Lus10013144	647	806	726.5	362	340	351	796	714	755	698	423	560.5
Lus10013210	64	130	97	26	30	28	146	387	266.5	1279	691	985
Lus10013371	27	28	27.5	28	23	25.5	12	8	10	1	0	0.5
Lus10013374	1134	1115	1124.5	562	504	533	1295	1131	1213	1295	835	1065
Lus10013475	142	203	172.5	112	114	113	211	168	189.5	317	194	255.5
Lus10013491	197	190	193.5	111	100	105.5	68	70	69	52	38	45
Lus10013497	481	558	519.5	143	117	130	213	143	178	120	132	126
Lus10013606	663	752	707.5	200	150	175	178	291	234.5	404	257	330.5
Lus10013618	11	10	10.5	1	2	1.5	3	3	3	2	2	2
Lus10013739	312	336	324	233	208	220.5	75	82	78.5	30	11	20.5
Lus10013821	77	149	113	33	27	30	41	31	36	38	28	33
Lus10014118	8	1	4.5	6	1	3.5	7	1	4	0	0	0
Lus10014366	230	269	249.5	159	119	139	999	444	721.5	656	471	563.5
Lus10014526	383	336	359.5	150	132	141	99	64	81.5	137	132	134.5
Lus10014749	138	175	156.5	136	137	136.5	212	129	170.5	204	118	161
Lus10014823	1313	1489	1401	660	549	604.5	854	1158	1006	731	545	638
Lus10015046	6	5	5.5	0	1	0.5	0	0	0	7	0	3.5
Lus10015080	519	548	533.5	236	221	228.5	458	319	388.5	1155	700	927.5
Lus10015126	279	348	313.5	142	118	130	392	252	322	388	241	314.5
Lus10015152	0	1	0.5	0	0	0	1	0	0.5	0	0	0
Lus10015167	5	8	6.5	3	6	4.5	10	7	8.5	21	21	21
Lus10015213	34	57	45.5	14	15	14.5	55	17	36	52	28	40
Lus10015260	1564	2057	1810.5	1016	779	897.5	1764	1689	1726.5	2512	1419	1965.5
Lus10015273	2383	2712	2547.5	960	824	892	932	457	694.5	450	209	329.5
Lus10015502	15	23	19	1	6	3.5	2	0	1	0	0	0
Lus10015503	362	390	376	279	231	255	304	268	286	194	198	196
Lus10015506	85	124	104.5	93	84	88.5	133	129	131	220	166	193
Lus10015722	807	894	850.5	449	314	381.5	560	291	425.5	644	346	495
Lus10015732	1	53	27	12	10	11	30	126	78	9	25	17
Lus10015837	0	0	0	0	0	0	0	0	0	0	0	0
Lus10015901	78	115	96.5	54	47	50.5	68	50	59	5	1	3
Lus10015986	1033	1179	1106	404	393	398.5	2505	5370	3937.5	1519	1549	1534
Lus10016040	37	47	42	5	8	6.5	24	47	35.5	11	14	12.5
Lus10016102	331	407	369	58	77	67.5	132	91	111.5	51	67	59
Lus10016163	32	22	27	91	63	77	155	327	241	29	79	54
Lus10016195	94	96	95	20	22	21	0	0	0	0	0	0
Lus10016303	42	22	32	1	23	12	1	60	30.5	15	8	11.5
Lus10016416	244	205	224.5	101	100	100.5	30	18	24	10	7	8.5
Lus10016426	537	622	579.5	520	395	457.5	335	273	304	450	349	399.5
Lus10016427	23	26	24.5	5	5	5	1	0	0.5	0	0	0
Lus10016428	0	1	0.5	1	0	0.5	2	0	1	0	0	0
Lus10016451	50	61	55.5	90	99	94.5	70	34	52	14	24	19
Lus10016541	1	0	0.5	0	0	0	0	1	0.5	0	0	0
Lus10016561	2634	3876	3255	1112	994	1053	331	166	248.5	160	140	150
Lus10016796	171	105	138	103	59	81	55	26	40.5	39	11	25
Lus10016817	692	772	732	202	168	185	658	612	635	432	206	319
Lus10016924	2	1	1.5	2	0	1	0	0	0	0	0	0
Lus10016936	983	991	987	289	259	274	301	283	292	273	188	230.5
Lus10017092	1305	1458	1381.5	611	408	509.5	689	771	730	759	546	652.5
Lus10017197	80	133	106.5	122	98	110	62	21	41.5	104	83	93.5
Lus10017253	2	11	6.5	10	2	6	1	0	0.5	2	0	1
Lus10017455	171	144	157.5	70	53	61.5	183	39	111	241	103	172
Lus10017510	30	16	23	35	28	31.5	11	68	39.5	2	4	3
Lus10017722	0	0	0	0	0	0	0	0	0	0	1	0.5
Lus10017750	222	244	233	83	63	73	71	67	69	44	30	37
Lus10017764	353	407	380	178	140	159	439	531	485	452	482	467
Lus10017788	229	292	260.5	121	100	110.5	476	422	449	627	479	553
Lus10017865	498	509	503.5	248	202	225	335	256	295.5	459	320	389.5
Lus10017969	1473	1802	1637.5	452	365	408.5	290	233	261.5	286	155	220.5
Lus10018110	466	526	496	346	295	320.5	265	250	257.5	267	229	248
Lus10018125	2643	3475	3059	1190	941	1065.5	2240	2033	2136.5	2352	1390	1871
Lus10018140	1	2	1.5	0	0	0	9	0	4.5	0	0	0
Lus10018167	396	340	368	453	370	411.5	720	637	678.5	618	583	600.5
Lus10018271	26	21	23.5	0	0	0	0	0	0	0	0	0
Lus10018292	738	642	690	219	221	220	80	30	55	1	1	1
Lus10018294	691	836	763.5	477	452	464.5	419	481	450	686	565	625.5
Lus10018409	148	119	133.5	74	59	66.5	98	96	97	259	139	199
Lus10018465	821	1004	912.5	424	347	385.5	795	780	787.5	1037	647	842
Lus10018609	233	258	245.5	115	128	121.5	191	148	169.5	228	134	181
Lus10018613	780	829	804.5	222	160	191	337	282	309.5	332	204	268
Lus10018817	170	236	203	34	34	34	18	15	16.5	16	7	11.5
Lus10019018	30	14	22	2	4	3	9	17	13	15	30	22.5
Lus10019075	491	535	513	290	210	250	403	222	312.5	461	296	378.5
Lus10019102	694	641	667.5	380	295	337.5	664	524	594	730	493	611.5
Lus10019507	99	84	91.5	82	77	79.5	77	29	53	139	70	104.5
Lus10019685	4	2	3	1	3	2	1	0	0.5	0	0	0
Lus10019686	20	29	24.5	8	10	9	7	0	3.5	0	0	0
Lus10019687	689	711	700	523	370	446.5	396	264	330	237	206	221.5
Lus10019703	144	159	151.5	52	64	58	22	17	19.5	17	6	11.5
Lus10019790	30	46	38	5	1	3	1	5	3	2	7	4.5
Lus10019839	1689	2799	2244	1201	904	1052.5	1037	701	869	1524	895	1209.5
Lus10019973	156	139	147.5	3	3	3	1	1	1	1	4	2.5
Lus10019974	855	961	908	374	393	383.5	1157	685	921	309	242	275.5
Lus10019979	81	205	143	199	161	180	482	392	437	789	617	703
Lus10020007	180	188	184	92	75	83.5	367	322	344.5	603	431	517
Lus10020033	1243	2039	1641	298	260	279	129	83	106	47	23	35
Lus10020084	174	240	207	99	60	79.5	87	74	80.5	60	34	47
Lus10020145	453	448	450.5	409	334	371.5	877	546	711.5	390	323	356.5
Lus10020256	401	461	431	221	205	213	345	207	276	605	336	470.5
Lus10020258	696	648	672	320	267	293.5	516	459	487.5	846	706	776
Lus10020349	235	176	205.5	97	65	81	222	216	219	186	164	175
Lus10020655	482	515	498.5	168	129	148.5	160	81	120.5	193	121	157
Lus10020859	3	5	4	0	0	0	0	0	0	0	0	0
Lus10020903	857	928	892.5	674	538	606	309	219	264	308	151	229.5
Lus10021063	93	105	99	59	29	44	35	35	35	22	10	16
Lus10021113	125	139	132	106	73	89.5	111	35	73	88	81	84.5
Lus10021197	126	69	97.5	32	27	29.5	2	2	2	2	0	1
Lus10021245	569	722	645.5	224	231	227.5	155	100	127.5	91	44	67.5
Lus10021403	749	860	804.5	564	415	489.5	527	423	475	504	309	406.5
Lus10021458	988	1054	1021	143	115	129	132	41	86.5	33	28	30.5
Lus10021524	32	36	34	29	25	27	74	93	83.5	117	80	98.5
Lus10021628	211	275	243	56	92	74	134	310	222	194	299	246.5
Lus10021670	585	701	643	258	230	244	746	595	670.5	639	510	574.5
Lus10021683	596	629	612.5	260	208	234	334	299	316.5	434	328	381
Lus10021710	335	501	418	393	334	363.5	131	87	109	118	64	91
Lus10021722	141	167	154	101	101	101	72	63	67.5	34	21	27.5
Lus10021801	326	496	411	260	260	260	331	263	297	526	373	449.5
Lus10021842	5	0	2.5	1	1	1	0	0	0	0	0	0
Lus10021953	480	500	490	277	207	242	302	301	301.5	204	127	165.5
Lus10021954	781	788	784.5	276	218	247	443	315	379	498	400	449
Lus10021993	16	15	15.5	5	4	4.5	17	2	9.5	0	0	0
Lus10022223	0	0	0	0	0	0	0	0	0	0	0	0
Lus10022294	237	213	225	219	222	220.5	80	51	65.5	22	15	18.5
Lus10022324	119	158	138.5	28	30	29	2	0	1	0	0	0
Lus10022405	596	615	605.5	446	347	396.5	532	582	557	625	520	572.5
Lus10022449	48	33	40.5	7	9	8	0	0	0	0	0	0
Lus10022567	818	952	885	228	268	248	55	32	43.5	36	14	25
Lus10022585	1072	1317	1194.5	243	171	207	534	222	378	58	30	44
Lus10022743	437	596	516.5	192	207	199.5	24	23	23.5	36	20	28
Lus10022774	909	1003	956	343	278	310.5	877	661	769	1212	916	1064
Lus10022895	262	314	288	64	61	62.5	7	4	5.5	26	19	22.5
Lus10022967	8	11	9.5	0	2	1	0	0	0	0	0	0
Lus10023055	304	277	290.5	44	33	38.5	7	8	7.5	0	0	0
Lus10023068	1620	1781	1700.5	665	450	557.5	1065	881	973	791	503	647
Lus10023112	408	420	414	184	176	180	201	303	252	101	85	93
Lus10023162	1346	1983	1664.5	841	575	708	719	356	537.5	846	459	652.5
Lus10023182	547	655	601	305	238	271.5	425	342	383.5	982	626	804
Lus10023235	604	599	601.5	198	189	193.5	344	232	288	252	184	218
Lus10023477	2380	1644	2012	743	737	740	628	492	560	510	299	404.5
Lus10023507	1612	1864	1738	726	623	674.5	1048	966	1007	910	719	814.5
Lus10023527	74	97	85.5	62	33	47.5	115	45	80	344	218	281
Lus10023617	13	8	10.5	28	19	23.5	3	2	2.5	3	1	2
Lus10023671	671	835	753	260	177	218.5	478	323	400.5	369	273	321
Lus10023914	497	636	566.5	129	115	122	217	252	234.5	302	257	279.5
Lus10024057	419	519	469	229	125	177	395	425	410	605	342	473.5
Lus10024124	6	12	9	1	2	1.5	3	2	2.5	3	8	5.5
Lus10024135	431	711	571	229	153	191	510	270	390	522	268	395
Lus10024372	720	865	792.5	440	422	431	340	657	498.5	455	304	379.5
Lus10024405	0	0	0	0	0	0	0	3	1.5	0	1	0.5
Lus10024629	0	0	0	0	0	0	0	0	0	0	0	0
Lus10024635	274	333	303.5	180	157	168.5	749	694	721.5	910	527	718.5
Lus10024657	276	355	315.5	70	66	68	11	16	13.5	2	4	3
Lus10024759	352	304	328	109	105	107	217	191	204	274	174	224
Lus10024810	1038	1267	1152.5	462	361	411.5	768	455	611.5	338	207	272.5
Lus10024881	11	4	7.5	10	11	10.5	0	1	0.5	0	0	0
Lus10025031	144	150	147	64	44	54	212	58	135	100	43	71.5
Lus10025145	181	209	195	4	12	8	3	1	2	2	2	2
Lus10025146	200	255	227.5	70	72	71	175	78	126.5	63	46	54.5
Lus10025162	46	43	44.5	9	8	8.5	13	8	10.5	5	13	9
Lus10025228	134	107	120.5	3	7	5	0	0	0	2	1	1.5
Lus10025338	0	0	0	0	0	0	0	0	0	0	0	0
Lus10025394	29	27	28	21	19	20	13	12	12.5	3	2	2.5
Lus10025563	8	4	6	10	6	8	0	0	0	0	0	0
Lus10025566	2141	2084	2112.5	1208	918	1063	1780	1241	1510.5	2509	1635	2072
Lus10025612	23	12	17.5	2	5	3.5	7	0	3.5	3	5	4
Lus10025671	21	23	22	9	8	8.5	27	16	21.5	10	6	8
Lus10025691	0	3	1.5	0	0	0	17	7	12	0	0	0
Lus10025921	1	0	0.5	0	1	0.5	6	5	5.5	10	5	7.5
Lus10025930	283	337	310	140	128	134	985	658	821.5	622	384	503
Lus10026104	182	158	170	101	91	96	100	121	110.5	221	256	238.5
Lus10026226	610	694	652	518	419	468.5	367	345	356	282	177	229.5
Lus10026380	702	876	789	684	444	564	740	681	710.5	1034	566	800
Lus10026420	1040	1649	1344.5	538	367	452.5	2339	2300	2319.5	3637	1800	2718.5
Lus10026501	2064	2192	2128	168	144	156	1220	291	755.5	146	56	101
Lus10026648	4	1	2.5	1	1	1	1	1	1	1	1	1
Lus10026941	281	275	278	221	187	204	814	584	699	538	396	467
Lus10027023	0	0	0	4	2	3	4	2	3	1	2	1.5
Lus10027027	1171	1352	1261.5	617	414	515.5	1053	624	838.5	1087	760	923.5
Lus10027441	228	295	261.5	111	108	109.5	306	237	271.5	690	640	665
Lus10027736	5	7	6	1	0	0.5	0	0	0	0	1	0.5
Lus10027744	13	8	10.5	32	33	32.5	1	6	3.5	4	6	5
Lus10027890	236	413	324.5	68	64	66	194	172	183	253	142	197.5
Lus10027921	1199	1198	1198.5	407	348	377.5	1905	970	1437.5	1589	1064	1326.5
Lus10027994	510	580	545	229	196	212.5	453	405	429	412	309	360.5
Lus10028009	0	1	0.5	0	0	0	0	0	0	0	0	0
Lus10028063	2	2	2	1	0	0.5	1	0	0.5	2	0	1
Lus10028249	186	161	173.5	134	137	135.5	7	14	10.5	3	4	3.5
Lus10028406	369	598	483.5	191	185	188	193	118	155.5	135	68	101.5
Lus10028454	34	33	33.5	17	18	17.5	9	4	6.5	14	5	9.5
Lus10028560	567	530	548.5	233	206	219.5	104	22	63	15	16	15.5
Lus10028597	8868	10882	9875	3573	3038	3305.5	1559	935	1247	2019	1545	1782
Lus10028773	0	2	1	0	3	1.5	1	4	2.5	4	0	2
Lus10028790	1031	1192	1111.5	636	491	563.5	142	85	113.5	122	46	84
Lus10029037	0	1	0.5	0	0	0	0	1	0.5	0	0	0
Lus10029136	687	671	679	307	238	272.5	107	56	81.5	45	23	34
Lus10029178	183	133	158	126	137	131.5	32	54	43	22	27	24.5
Lus10029242	24	20	22	12	15	13.5	16	19	17.5	16	8	12
Lus10029292	41	1	21	39	58	48.5	70	100	85	1	19	10
Lus10029351	26	17	21.5	6	1	3.5	1	0	0.5	0	1	0.5
Lus10029456	0	2	1	26	14	20	4	1	2.5	5	4	4.5
Lus10029582	962	977	969.5	434	344	389	954	982	968	1099	943	1021
Lus10029693	10	7	8.5	3	1	2	4	4	4	0	1	0.5
Lus10029794	0	0	0	0	0	0	0	0	0	0	0	0
Lus10029886	734	786	760	262	271	266.5	281	134	207.5	254	226	240
Lus10029940	276	292	284	74	73	73.5	84	94	89	13	8	10.5
Lus10029990	1267	817	1042	507	373	440	501	203	352	311	213	262
Lus10029993	0	1	0.5	0	1	0.5	2	4	3	0	1	0.5
Lus10030117	472	376	424	248	174	211	316	151	233.5	153	65	109
Lus10030120	126	82	104	59	32	45.5	0	0	0	1	0	0.5
Lus10030199	5672	5884	5778	2901	2796	2848.5	3610	2700	3155	4052	3026	3539
Lus10030375	840	927	883.5	202	175	188.5	208	210	209	166	104	135
Lus10030464	18	0	9	6	9	7.5	27	25	26	149	93	121
Lus10030472	178	312	245	150	144	147	129	123	126	127	135	131
Lus10030512	45	50	47.5	24	25	24.5	27	8	17.5	17	16	16.5
Lus10030597	218	285	251.5	70	68	69	82	80	81	39	40	39.5
Lus10030728	108	172	140	65	74	69.5	173	426	299.5	1306	740	1023
Lus10030891	494	532	513	150	198	174	220	286	253	195	197	196
Lus10030972	0	0	0	0	0	0	0	0	0	0	0	0
Lus10031152	1567	1847	1707	676	564	620	971	707	839	866	566	716
Lus10031202	1910	1755	1832.5	978	922	950	515	160	337.5	305	216	260.5
Lus10031275	139	83	111	163	150	156.5	39	15	27	8	4	6
Lus10031468	47	87	67	22	12	17	57	36	46.5	64	27	45.5
Lus10031491	462	448	455	199	159	179	133	143	138	103	107	105
Lus10031515	35	62	48.5	32	26	29	64	23	43.5	2	3	2.5
Lus10031549	261	240	250.5	97	83	90	95	91	93	103	97	100
Lus10031618	1242	1562	1402	434	357	395.5	476	406	441	324	210	267
Lus10031728	1289	1367	1328	484	409	446.5	553	557	555	662	527	594.5
Lus10031780	542	432	487	174	132	153	26	12	19	4	9	6.5
Lus10032119	86	119	102.5	21	32	26.5	18	13	15.5	11	18	14.5
Lus10032161	621	422	521.5	122	251	186.5	248	255	251.5	94	166	130
Lus10032265	0	0	0	0	0	0	0	0	0	0	0	0
Lus10032270	597	653	625	258	211	234.5	881	772	826.5	613	351	482
Lus10032290	170	236	203	29	50	39.5	8	26	17	1	6	3.5
Lus10032382	5	5	5	2	1	1.5	10	5	7.5	1	0	0.5
Lus10032402	1255	1682	1468.5	628	514	571	1164	1283	1223.5	1530	841	1185.5
Lus10032418	158	114	136	46	20	33	8	2	5	1	0	0.5
Lus10032471	986	1224	1105	764	559	661.5	650	492	571	534	408	471
Lus10033053	797	808	802.5	367	313	340	736	1043	889.5	643	635	639
Lus10033075	156	147	151.5	47	47	47	158	156	157	233	99	166
Lus10033252	148	200	174	94	91	92.5	256	295	275.5	696	563	629.5
Lus10033425	1	0	0.5	0	0	0	0	1	0.5	0	0	0
Lus10033515	4	20	12	0	0	0	1	0	0.5	0	0	0
Lus10033682	1	0	0.5	0	0	0	0	0	0	0	0	0
Lus10033725	1807	2004	1905.5	522	412	467	824	715	769.5	484	353	418.5
Lus10033860	167	251	209	172	157	164.5	110	186	148	112	46	79
Lus10033969	298	455	376.5	251	203	227	349	251	300	22	39	30.5
Lus10033985	600	660	630	379	322	350.5	277	376	326.5	445	302	373.5
Lus10034030	290	405	347.5	99	111	105	424	284	354	514	356	435
Lus10034049	565	580	572.5	212	213	212.5	172	157	164.5	201	128	164.5
Lus10034088	1528	1567	1547.5	1226	917	1071.5	1137	1095	1116	1223	1011	1117
Lus10034153	4	2	3	0	0	0	0	0	0	0	0	0
Lus10034157	234	277	255.5	109	68	88.5	31	21	26	9	3	6
Lus10034346	1750	1661	1705.5	585	462	523.5	1439	871	1155	652	437	544.5
Lus10034367	896	796	846	594	417	505.5	443	302	372.5	442	346	394
Lus10034407	34	37	35.5	12	6	9	179	140	159.5	106	108	107
Lus10034454	547	667	607	281	251	266	401	319	360	372	243	307.5
Lus10034470	1622	2173	1897.5	592	434	513	1294	997	1145.5	1441	591	1016
Lus10034551	8	14	11	1	0	0.5	28	30	29	22	15	18.5
Lus10034587	599	688	643.5	295	284	289.5	579	511	545	1257	1009	1133
Lus10034640	126	146	136	147	121	134	423	299	361	218	128	173
Lus10034644	128	116	122	113	78	95.5	233	279	256	57	49	53
Lus10034667	585	531	558	283	213	248	302	242	272	302	256	279
Lus10034793	2	3	2.5	1	1	1	0	2	1	0	0	0
Lus10034832	1303	1122	1212.5	568	481	524.5	481	611	546	635	423	529
Lus10034953	14	15	14.5	2	1	1.5	0	0	0	1	0	0.5
Lus10035010	676	758	717	278	273	275.5	524	318	421	299	247	273
Lus10035023	579	549	564	264	196	230	286	304	295	334	234	284
Lus10035057	285	347	316	232	180	206	497	259	378	126	84	105
Lus10035271	100	144	122	162	136	149	342	219	280.5	103	54	78.5
Lus10035332	750	396	573	370	356	363	385	251	318	308	211	259.5
Lus10035335	14	7	10.5	19	22	20.5	0	1	0.5	1	1	1
Lus10035368	1	0	0.5	0	1	0.5	0	0	0	0	0	0
Lus10035549	1	0	0.5	4	6	5	0	1	0.5	0	1	0.5
Lus10035553	1100	1759	1429.5	954	787	870.5	1043	1219	1131	1741	1184	1462.5
Lus10035677	26	25	25.5	8	3	5.5	24	39	31.5	44	74	59
Lus10035820	9	9	9	8	1	4.5	70	57	63.5	71	56	63.5
Lus10035857	731	909	820	252	210	231	686	676	681	539	308	423.5
Lus10035931	0	2	1	0	0	0	0	0	0	0	0	0
Lus10036034	624	523	573.5	261	207	234	2578	4185	3381.5	2359	2161	2260
Lus10036127	236	303	269.5	197	144	170.5	106	91	98.5	135	108	121.5
Lus10036128	71	121	96	68	60	64	147	90	118.5	96	83	89.5
Lus10036138	2807	3589	3198	1364	1201	1282.5	1998	1733	1865.5	2469	1520	1994.5
Lus10036151	337	472	404.5	72	79	75.5	93	114	103.5	143	117	130
Lus10036378	105	78	91.5	43	49	46	29	22	25.5	19	21	20
Lus10036380	0	0	0	0	0	0	0	0	0	0	0	0
Lus10036404	33	72	52.5	13	15	14	11	6	8.5	12	8	10
Lus10036466	2	0	1	0	2	1	0	0	0	0	0	0
Lus10036754	331	325	328	134	96	115	61	48	54.5	11	13	12
Lus10036757	27	19	23	17	5	11	90	125	107.5	117	168	142.5
Lus10036764	252	232	242	54	77	65.5	28	57	42.5	26	19	22.5
Lus10036934	109	150	129.5	77	92	84.5	293	1101	697	379	385	382
Lus10036937	603	514	558.5	271	219	245	291	275	283	247	232	239.5
Lus10037053	258	180	219	178	158	168	501	1111	806	435	417	426
Lus10037162	1376	1305	1340.5	1238	1119	1178.5	158	167	162.5	132	117	124.5
Lus10037172	427	442	434.5	210	211	210.5	188	198	193	100	84	92
Lus10037264	68	51	59.5	21	13	17	23	51	37	31	82	56.5
Lus10037391	26	20	23	7	15	11	7	6	6.5	1	3	2
Lus10037410	251	180	215.5	106	89	97.5	57	39	48	11	7	9
Lus10037490	22	33	27.5	14	3	8.5	9	13	11	24	10	17
Lus10037580	479	540	509.5	385	281	333	587	486	536.5	775	595	685
Lus10037812	1046	1349	1197.5	378	313	345.5	386	347	366.5	418	275	346.5
Lus10037906	83	80	81.5	30	14	22	45	64	54.5	78	37	57.5
Lus10037928	448	496	472	190	134	162	399	297	348	294	158	226
Lus10038048	1362	1494	1428	634	506	570	931	1040	985.5	900	669	784.5
Lus10038095	843	841	842	338	254	296	375	395	385	329	254	291.5
Lus10038169	359	429	394	278	192	235	584	335	459.5	262	154	208
Lus10038180	4	2	3	0	0	0	0	0	0	0	0	0
Lus10038341	3602	3818	3710	2274	2000	2137	1588	1211	1399.5	1239	803	1021
Lus10038632	98	85	91.5	8	5	6.5	25	78	51.5	40	38	39
Lus10038656	757	865	811	318	214	266	390	280	335	320	193	256.5
Lus10038731	636	845	740.5	708	537	622.5	96	115	105.5	265	146	205.5
Lus10039001	663	853	758	412	323	367.5	929	849	889	1126	878	1002
Lus10039127	414	697	555.5	625	477	551	68	83	75.5	162	112	137
Lus10039202	299	315	307	203	147	175	73	83	78	41	25	33
Lus10039607	2970	3402	3186	1036	836	936	1277	634	955.5	641	403	522
Lus10039634	366	538	452	184	151	167.5	106	100	103	258	139	198.5
Lus10039845	287	294	290.5	137	104	120.5	324	165	244.5	375	178	276.5
Lus10039848	2112	1968	2040	388	333	360.5	274	158	216	137	67	102
Lus10040151	0	1	0.5	0	0	0	0	0	0	0	0	0
Lus10040240	221	293	257	70	80	75	31	28	29.5	8	8	8
Lus10040278	317	492	404.5	201	195	198	155	91	123	59	119	89
Lus10040359	2368	1517	1942.5	920	728	824	905	723	814	482	363	422.5
Lus10040389	1138	1087	1112.5	630	497	563.5	784	593	688.5	804	553	678.5
Lus10040413	137	218	177.5	70	76	73	181	52	116.5	442	207	324.5
Lus10040508	339	385	362	122	104	113	133	127	130	91	48	69.5
Lus10040613	340	419	379.5	537	521	529	710	649	679.5	647	537	592
Lus10040616	96	127	111.5	111	101	106	107	59	83	9	13	11
Lus10040617	312	252	282	77	82	79.5	0	0	0	1	0	0.5
Lus10040716	86	89	87.5	128	134	131	73	25	49	13	18	15.5
Lus10040783	290	278	284	404	340	372	880	391	635.5	1749	1600	1674.5
Lus10040829	1670	2372	2021	531	476	503.5	83	115	99	134	82	108
Lus10040914	669	735	702	399	388	393.5	1466	1445	1455.5	1259	824	1041.5
Lus10040942	398	232	315	154	114	134	6	7	6.5	5	9	7
Lus10041008	955	1236	1095.5	495	352	423.5	430	363	396.5	282	178	230
Lus10041063	4034	4340	4187	1903	1530	1716.5	1005	616	810.5	455	257	356
Lus10041079	14	43	28.5	4	12	8	3	22	12.5	2	1	1.5
Lus10041134	1	0	0.5	0	0	0	0	0	0	0	0	0
Lus10041156	223	296	259.5	15	30	22.5	2	5	3.5	2	0	1
Lus10041244	1480	1821	1650.5	584	509	546.5	632	751	691.5	578	430	504
Lus10041246	551	695	623	321	203	262	353	345	349	528	323	425.5
Lus10041300	904	881	892.5	323	300	311.5	641	535	588	1022	641	831.5
Lus10041301	1437	1591	1514	772	630	701	1906	1801	1853.5	2978	1861	2419.5
Lus10041321	32	45	38.5	18	15	16.5	8	7	7.5	30	8	19
Lus10041359	891	971	931	422	345	383.5	547	315	431	327	296	311.5
Lus10041603	2460	2874	2667	1092	785	938.5	1290	1135	1212.5	1470	1090	1280
Lus10041689	1179	1398	1288.5	484	352	418	1309	1104	1206.5	754	490	622
Lus10041859	639	996	817.5	118	166	142	133	181	157	199	192	195.5
Lus10041896	477	480	478.5	449	369	409	914	860	887	1026	805	915.5
Lus10041907	105	97	101	31	17	24	46	33	39.5	24	10	17
Lus10042156	790	991	890.5	455	435	445	971	906	938.5	950	840	895
Lus10042171	0	0	0	0	0	0	0	1	0.5	0	0	0
Lus10042188	6	4	5	1	0	0.5	1	5	3	2	0	1
Lus10042190	418	578	498	326	218	272	68	61	64.5	62	43	52.5
Lus10042277	1	3	2	8	2	5	0	4	2	4	1	2.5
Lus10042443	482	526	504	422	350	386	276	213	244.5	183	112	147.5
Lus10042532	17	22	19.5	2	0	1	0	1	0.5	1	0	0.5
Lus10042890	1581	2012	1796.5	948	764	856	2588	1866	2227	2103	1245	1674
Lus10042969	698	816	757	365	276	320.5	435	461	448	329	295	312
Lus10043027	4	3	3.5	0	2	1	20	39	29.5	3	0	1.5
Lus10043353	76	56	66	107	83	95	93	50	71.5	397	263	330
Lus10043365	321	391	356	81	96	88.5	266	202	234	322	188	255
Lus10043426	671	826	748.5	475	456	465.5	133	112	122.5	56	51	53.5
Lus10043428	457	471	464	122	98	110	591	485	538	208	211	209.5
