# Supplementary material for: Genome-wide identification of RING finger genes in flax (Linum usitatissimum) and analyses of their evolution
Source: PeerJ. 2021 Nov 15;9:e12491. doi: 10.7717/peerj.12491 (PMC8601054; doi:10.7717/peerj.12491)
Supplement: Supplemental Information 17 [file peerj-09-12491-s017.xlsx]

## Sheet: Sheet1
Table S6. FPKM transcription count data for 556 flax RING finger genes in the apical region (AR) and the basal region (BR) of the shoot apex.
Gene	Locus	Sample_1	Sample_2	Status	AR(FPKM)	BR(FPKM)	log2(fold_change)	Test_stat	P_value	Q_value	Significant
Lus10000023.g	C8186631:8-611	q1	q2	OK	3.78749	8.69933	1.19966	1.47702	0.0176	0.0421901	yes
Lus10000333.g	scaffold3845:15272-16463	q1	q2	OK	0.0187593	1.05707	5.81632	0.841874	0.11675	0.194098	no
Lus10000412.g	scaffold4420:4717-6155	q1	q2	OK	3.7538	1.5087	-1.31505	-1.50652	0.01645	0.0398571	yes
Lus10000487.g	scaffold2945:33793-34735	q1	q2	NOTEST	0.0355671	0	#NAME?	0	1	1	no
Lus10000513.g	scaffold2212:4988-8054	q1	q2	OK	9.53192	8.66299	-0.137901	-0.270619	0.62185	0.703498	no
Lus10000533.g	scaffold236:30684-34632	q1	q2	OK	20.343	17.4861	-0.218324	-0.508094	0.3754	0.475023	no
Lus10000710.g	scaffold2174:41471-43452	q1	q2	OK	1.33741	10.5143	2.97484	3.56913	0.00015	0.000724673	yes
Lus10000845.g	scaffold3265:51356-53888	q1	q2	OK	23.46	0.622601	-5.23575	-5.67622	5e-05	0.000268796	yes
Lus10000885.g	scaffold643:30990-31326	q1	q2	NOTEST	0	0	0	0	1	1	no
Lus10000899.g	scaffold381:22585-25084	q1	q2	OK	19.6784	25.8073	0.391166	0.914215	0.10855	0.184679	no
Lus10000908.g	scaffold381:51920-54475	q1	q2	OK	11.5108	8.10267	-0.50652	-1.10232	0.0517	0.102158	no
Lus10000996.g	scaffold2096:6327-9220	q1	q2	OK	12.4025	16.3921	0.402375	0.891302	0.11535	0.192305	no
Lus10001131.g	scaffold1100:59916-68680	q1	q2	OK	19.3763	16.0018	-0.27606	-0.598572	0.29195	0.389861	no
Lus10001209.g	scaffold728:52240-53695	q1	q2	OK	21.3515	70.3663	1.72055	3.7145	5e-05	0.000268796	yes
Lus10001530.g	scaffold1045:30841-49684	q1	q2	OK	2.5025	1.57618	-0.666943	-1.57138	0.00575	0.0165263	yes
Lus10001534.g,Lus10001535.g	scaffold1045:76104-81976	q1	q2	OK	2.36048	2.91291	0.303377	0.412967	0.4294	0.528071	no
Lus10001568.g	scaffold3460:50767-53289	q1	q2	OK	10.8791	24.1842	1.15251	2.37874	5e-05	0.000268796	yes
Lus10001582.g,Lus10001583.g	scaffold2796:14643-16260	q1	q2	OK	11.2123	12.396	0.144791	0.146399	0.7725	0.828542	no
Lus10001611.g,Lus10001612.g	scaffold1025:36551-41453	q1	q2	OK	0.395872	2.45099	2.63025	1.91241	0.0499	0.0992849	no
Lus10001654.g	scaffold2252:82355-88010	q1	q2	OK	24.8096	39.1144	0.656801	0.447885	0.3828	0.482395	no
Lus10001683.g	scaffold591:69072-75010	q1	q2	OK	5.72301	10.7748	0.912818	1.09407	0.07355	0.135289	no
Lus10001685.g	scaffold591:78215-79054	q1	q2	OK	0.0763872	13.8056	7.49771	2.16693	0.2637	0.362701	no
Lus10002051.g,Lus10002052.g	scaffold752:34370-44743	q1	q2	OK	7.09007	4.73488	-0.582472	-1.17788	0.033	0.0709983	no
Lus10002113.g	scaffold1052:36135-37805	q1	q2	OK	22.285	33.0476	0.568472	1.27044	0.0239	0.0543798	no
Lus10002131.g	scaffold1052:105436-108991	q1	q2	OK	21.167	18.1291	-0.223511	-0.526146	0.34385	0.442742	no
Lus10002194.g	scaffold1010:71479-74024	q1	q2	NOTEST	0.0340628	0.537831	3.98089	0	1	1	no
Lus10002282.g	scaffold2280:38868-44901	q1	q2	OK	16.4561	2.43975	-2.75382	-1.45753	0.0054	0.0156914	yes
Lus10002316.g	scaffold120:71045-74735	q1	q2	OK	2.50781	0.31366	-2.99916	-2.88245	0.00105	0.00392827	yes
Lus10002369.g,Lus10002370.g	scaffold2788:41134-55262	q1	q2	OK	14.5436	13.9495	-0.0601773	-0.0912005	0.87615	0.909562	no
Lus10002391.g	scaffold1595:47985-52977	q1	q2	OK	37.0828	19.5631	-0.922615	-2.20953	0.00025	0.0011337	yes
Lus10002487.g	scaffold1199:38061-41629	q1	q2	OK	5.93996	9.29324	0.645728	1.33705	0.0187	0.0443408	yes
Lus10002491.g	scaffold1199:53638-56018	q1	q2	OK	7.39721	23.895	1.69165	2.84704	5e-05	0.000268796	yes
Lus10002554.g	scaffold134:65455-74996	q1	q2	OK	2.40196	1.57308	-0.610619	-0.677509	0.1993	0.292804	no
Lus10002584.g	scaffold1999:5212-6838	q1	q2	OK	45.879	40.4551	-0.181511	-0.432987	0.43635	0.534729	no
Lus10002637.g	scaffold2083:104618-106021	q1	q2	NOTEST	0.0328863	0	#NAME?	0	1	1	no
Lus10002639.g	scaffold2083:110626-118493	q1	q2	OK	50.2264	17.5612	-1.51605	-3.54832	5e-05	0.000268796	yes
Lus10002679.g	scaffold1347:49876-59261	q1	q2	OK	9.45534	6.90448	-0.453596	-1.0872	0.05735	0.111177	no
Lus10002706.g	scaffold530:82286-85378	q1	q2	OK	23.6251	18.8231	-0.327818	-0.664261	0.24515	0.343701	no
Lus10002761.g	scaffold2896:121958-125081	q1	q2	OK	30.4477	10.2508	-1.5706	-3.2981	5e-05	0.000268796	yes
Lus10002939.g	scaffold1060:56131-60975	q1	q2	OK	3.23038	6.41027	0.988681	2.0027	0.001	0.00376518	yes
Lus10002940.g	scaffold1060:65682-71195	q1	q2	OK	3.19225	6.9975	1.13226	2.20497	0.00015	0.000724673	yes
Lus10003261.g	scaffold885:11409-14961	q1	q2	OK	4.58295	5.53949	0.273477	0.497232	0.38155	0.481141	no
Lus10003400.g	scaffold1068:148729-149179	q1	q2	NOTEST	0	0	0	0	1	1	no
Lus10003473.g	scaffold80:88643-90830	q1	q2	OK	3.9991	4.07816	0.0282425	0.0347148	0.9523	0.966398	no
Lus10003485.g	scaffold508:54858-57192	q1	q2	OK	4.60813	21.9779	2.2538	4.82001	5e-05	0.000268796	yes
Lus10003525.g	scaffold144:96462-102586	q1	q2	NOTEST	0.3099	0.653169	1.07565	0	1	1	no
Lus10003526.g	scaffold144:107561-112416	q1	q2	OK	6.97267	30.0152	2.10591	4.68527	5e-05	0.000268796	yes
Lus10003551.g	scaffold669:76259-76919	q1	q2	NOTEST	0.113545	0	#NAME?	0	1	1	no
Lus10003617.g	scaffold1099:101925-102441	q1	q2	OK	1.81183	2.19125	0.274311	0.21219	0.70415	0.772284	no
Lus10003698.g	scaffold1042:74966-76588	q1	q2	OK	5.13636	8.43678	0.715946	1.1677	0.03955	0.0823478	no
Lus10003992.g	scaffold437:165368-166247	q1	q2	OK	0.0515285	5.91549	6.84298	1.91575	0.2656	0.364462	no
Lus10004001.g	scaffold1155:27550-29231	q1	q2	OK	31.278	33.0236	0.0783468	0.182756	0.7411	0.803008	no
Lus10004058.g	scaffold808:105138-111380	q1	q2	OK	18.8482	8.48338	-1.15172	-0.850045	0.2394	0.337633	no
Lus10004162.g	scaffold2404:78737-80904	q1	q2	OK	18.9721	13.5716	-0.483285	-1.10836	0.04795	0.0961413	no
Lus10004246.g	scaffold122:69982-71354	q1	q2	OK	7.96749	14.7313	0.886687	1.69169	0.00435	0.0130803	yes
Lus10004419.g	scaffold288:6766-9637	q1	q2	OK	11.4534	23.0187	1.00703	2.07029	0.0006	0.00241292	yes
Lus10004460.g	scaffold768:532-1720	q1	q2	OK	1.31221	19.8568	3.91957	5.07042	5e-05	0.000268796	yes
Lus10004466.g,Lus10004467.g	scaffold768:27589-31702	q1	q2	OK	12.3447	33.2484	1.42939	2.95484	5e-05	0.000268796	yes
Lus10004521.g	scaffold406:109858-114053	q1	q2	OK	8.80144	7.11053	-0.307783	-0.707533	0.21	0.305284	no
Lus10004557.g	scaffold48:112006-116839	q1	q2	OK	15.4912	22.985	0.569246	1.0517	0.06175	0.11789	no
Lus10004572.g	scaffold48:163279-164233	q1	q2	NOTEST	0.20366	0.205002	0.00947837	0	1	1	no
Lus10004636.g	scaffold183:72705-73649	q1	q2	NOTEST	0	0	0	0	1	1	no
Lus10004666.g	scaffold183:196834-198640	q1	q2	OK	3.04312	3.7305	0.293815	0.361308	0.52005	0.612531	no
Lus10004712.g	scaffold1421:193496-195344	q1	q2	OK	17.6144	43.3621	1.29968	2.74119	5e-05	0.000268796	yes
Lus10004813.g	scaffold426:50714-54566	q1	q2	OK	11.0949	20.3323	0.873868	1.3214	0.0229	0.0525077	no
Lus10004821.g	scaffold426:97104-98731	q1	q2	OK	11.3037	29.9611	1.4063	2.64632	0.00015	0.000724673	yes
Lus10004977.g	scaffold2786:156812-167673	q1	q2	OK	9.98501	15.3372	0.619204	0.702809	0.21385	0.309626	no
Lus10005084.g	scaffold1311:57821-61885	q1	q2	OK	23.4023	45.3192	0.953472	0.831019	0.09035	0.159199	no
Lus10005111.g	scaffold1311:203566-213060	q1	q2	OK	8.68902	11.2076	0.367207	0.328416	0.5644	0.653033	no
Lus10005126.g,Lus10005127.g	scaffold846:109576-123657	q1	q2	OK	2.05664	0.384237	-2.42022	-2.17909	0.00065	0.00258759	yes
Lus10005220.g	scaffold773:7156-9216	q1	q2	OK	4.70943	12.9463	1.45891	2.13197	0.0005	0.00206568	yes
Lus10005237.g	scaffold773:80828-81524	q1	q2	NOTEST	0	0	0	0	1	1	no
Lus10005275.g	scaffold109:55615-56059	q1	q2	NOTEST	0.214336	0.964458	2.16985	0	1	1	no
Lus10005389.g	scaffold547:117317-117779	q1	q2	OK	0.614995	15.9027	4.69255	3.21522	0.04865	0.0972837	no
Lus10005617.g	scaffold1721:58848-59208	q1	q2	OK	17.3705	20.0136	0.204347	0.280488	0.62375	0.705181	no
Lus10005754.g	scaffold1036:78878-81560	q1	q2	OK	10.7111	24.4186	1.18887	2.68989	5e-05	0.000268796	yes
Lus10005814.g	scaffold24:208201-208870	q1	q2	OK	0.125757	29.0605	7.85227	3.80911	0.19915	0.292608	no
Lus10005815.g	scaffold24:213082-213739	q1	q2	NOTEST	0	0.256357	inf	0	1	1	no
Lus10005816.g	scaffold24:215070-215676	q1	q2	NOTEST	0	0.474974	inf	0	1	1	no
Lus10005817.g	scaffold24:221392-222124	q1	q2	OK	0.094714	28.4713	8.23171	3.33362	0.225	0.321536	no
Lus10005818.g	scaffold24:225026-225512	q1	q2	OK	0	88.6578	inf	nan	5e-05	0.000268796	yes
Lus10005859.g	scaffold1158:32038-42247	q1	q2	OK	15.0215	80.2669	2.41777	1.9091	0.00965	0.025565	yes
Lus10005954.g	scaffold422:173297-176848	q1	q2	NOTEST	0.220745	0.128853	-0.776655	0	1	1	no
Lus10006074.g	scaffold821:138606-140656	q1	q2	OK	23.3546	82.3006	1.8172	4.3449	5e-05	0.000268796	yes
Lus10006161.g	scaffold779:52238-57356	q1	q2	OK	32.8415	34.9108	0.0881548	0.207088	0.7169	0.783248	no
Lus10006253.g	scaffold1140:251176-252860	q1	q2	OK	6.05349	32.3068	2.416	4.12999	5e-05	0.000268796	yes
Lus10006279.g	scaffold308:146938-147658	q1	q2	NOTEST	0	0.32022	inf	0	1	1	no
Lus10006378.g	scaffold1603:108009-111355	q1	q2	OK	12.6852	16.6326	0.390863	0.940873	0.0982	0.170402	no
Lus10006447.g	scaffold743:132662-134632	q1	q2	OK	3.80764	13.776	1.85519	2.59819	0.00035	0.0015175	yes
Lus10006448.g	scaffold743:139285-140995	q1	q2	OK	3.35666	1.00659	-1.73755	-1.50091	0.02125	0.0492919	yes
Lus10006449.g	scaffold743:143180-143912	q1	q2	NOTEST	0	0	0	0	1	1	no
Lus10006463.g	scaffold743:216015-218517	q1	q2	OK	0.0167706	1.45761	6.44153	0.90472	0.1136	0.18998	no
Lus10006493.g	scaffold596:130208-131105	q1	q2	OK	1.37849	11.8005	3.09769	3.57811	0.00015	0.000724673	yes
Lus10006558.g	scaffold1202:90151-92905	q1	q2	OK	1.10641	0.710702	-0.638573	-0.541818	0.33445	0.433206	no
Lus10006651.g	scaffold345:132496-135883	q1	q2	OK	16.2939	13.4972	-0.271675	-0.617046	0.2751	0.373368	no
Lus10006741.g	scaffold204:93756-98962	q1	q2	OK	8.15339	2.64131	-1.62614	-3.33751	5e-05	0.000268796	yes
Lus10006785.g	scaffold689:18136-18811	q1	q2	OK	0	60.1695	inf	nan	5e-05	0.000268796	yes
Lus10006786.g	scaffold689:23680-24274	q1	q2	OK	0.0420218	3.12001	6.21427	0.980088	0.1094	0.185042	no
Lus10006787.g	scaffold689:31278-37312	q1	q2	OK	27.4253	51.7762	0.916785	1.37628	0.0144	0.035723	yes
Lus10006832.g	scaffold1356:16711-19791	q1	q2	OK	9.4722	8.39698	-0.173829	-0.310947	0.5811	0.667423	no
Lus10007106.g	scaffold772:260910-271546	q1	q2	OK	3.17307	3.05219	-0.0560349	-0.0311042	0.9585	0.970876	no
Lus10007293.g	scaffold859:109599-110884	q1	q2	OK	0.309026	1.32698	2.10235	1.26717	0.0799	0.144369	no
Lus10007296.g	scaffold859:119543-123410	q1	q2	OK	0.106155	91.2356	9.74728	7.29922	0.01545	0.0378511	yes
Lus10007538.g	scaffold259:25395-31389	q1	q2	OK	52.6953	112.796	1.09797	2.19944	0.0003	0.00132802	yes
Lus10007628.g	scaffold121:126014-126980	q1	q2	NOTEST	0.112766	0.294832	1.38656	0	1	1	no
Lus10007703.g	scaffold221:180210-180899	q1	q2	NOTEST	0.037428	0.105621	1.49671	0	1	1	no
Lus10007867.g	scaffold1317:56731-57480	q1	q2	NOTEST	0	0	0	0	1	1	no
Lus10007936.g	scaffold281:48632-51393	q1	q2	OK	13.3768	36.9209	1.46471	1.28207	0.0607	0.11635	no
Lus10007937.g	scaffold281:54113-54569	q1	q2	OK	9.82484	28.4982	1.53637	2.24044	0.00085	0.00326626	yes
Lus10007967.g	scaffold281:164167-166279	q1	q2	OK	29.3516	40.1979	0.453679	1.10783	0.0497	0.0989639	no
Lus10008046.g	scaffold896:180420-182118	q1	q2	OK	22.2126	15.2351	-0.543975	-1.01778	0.074	0.135886	no
Lus10008106.g	scaffold524:149081-152371	q1	q2	OK	12.3333	19.8152	0.684051	1.59895	0.0053	0.0154472	yes
Lus10008163.g	scaffold480:38657-41736	q1	q2	OK	7.19442	12.2637	0.769448	1.39791	0.01325	0.033301	yes
Lus10008225.g	scaffold157:171601-173772	q1	q2	OK	0.478361	59.9636	6.96984	7.15285	0.00015	0.000724673	yes
Lus10008235.g	scaffold157:241816-242341	q1	q2	OK	1.44317	3.91369	1.43929	1.09153	0.06895	0.128649	no
Lus10008283.g	scaffold489:133369-133915	q1	q2	NOTEST	0.0497879	0.470196	3.23939	0	1	1	no
Lus10008286.g	scaffold489:149512-152058	q1	q2	OK	10.6212	23.1097	1.12155	2.25003	0.0002	0.00093316	yes
Lus10008447.g	scaffold61:297820-301200	q1	q2	OK	26.9561	36.0955	0.421207	0.949133	0.09175	0.161238	no
Lus10008458.g	scaffold295:48862-49276	q1	q2	NOTEST	0	0	0	0	1	1	no
Lus10008627.g,Lus10008628.g	scaffold1686:198525-216496	q1	q2	OK	19.3412	31.6858	0.71216	1.64448	0.00335	0.0104538	yes
Lus10008797.g	scaffold729:273727-274456	q1	q2	NOTEST	0	0	0	0	1	1	no
Lus10008874.g	scaffold311:97876-99303	q1	q2	OK	15.0596	16.657	0.145447	0.320646	0.5646	0.653201	no
Lus10008972.g	scaffold1486:278982-279519	q1	q2	NOTEST	0	0.112399	inf	0	1	1	no
Lus10009035.g	scaffold883:185473-189828	q1	q2	OK	17.0848	36.0035	1.07543	2.58395	5e-05	0.000268796	yes
Lus10009326.g	scaffold318:356828-357230	q1	q2	NOTEST	0	1.02873	inf	0	1	1	no
Lus10009438.g	scaffold981:115395-117614	q1	q2	OK	19.118	121.832	2.6719	6.2036	5e-05	0.000268796	yes
Lus10009511.g	scaffold1007:293026-294226	q1	q2	NOTEST	0	0.120896	inf	0	1	1	no
Lus10009529.g	scaffold1331:55536-56811	q1	q2	OK	20.0615	15.2389	-0.396667	-0.677236	0.23035	0.327511	no
Lus10009674.g	scaffold169:293399-297561	q1	q2	OK	11.5122	31.4883	1.45166	3.27075	5e-05	0.000268796	yes
Lus10009695.g	scaffold455:111653-113857	q1	q2	OK	82.177	83.9497	0.0307901	0.0754383	0.8923	0.92187	no
Lus10009773.g	scaffold271:68932-72088	q1	q2	OK	26.6815	28.0683	0.0730999	0.177197	0.7532	0.812509	no
Lus10009810.g	scaffold546:4298-6840	q1	q2	OK	25.1313	31.7552	0.337508	0.706194	0.21815	0.314265	no
Lus10009832.g	scaffold546:127451-127982	q1	q2	OK	3.64358	5.55931	0.609549	0.652644	0.24415	0.342728	no
Lus10010011.g	scaffold1630:246641-255860	q1	q2	OK	4.93495	42.0139	3.08976	2.94909	5e-05	0.000268796	yes
Lus10010069.g	scaffold722:56642-60957	q1	q2	OK	11.5336	14.9868	0.377846	0.921107	0.10545	0.180415	no
Lus10010179.g	scaffold587:161500-164290	q1	q2	OK	22.3486	30.0718	0.428225	0.962731	0.09095	0.16006	no
Lus10010182.g	scaffold587:169601-172800	q1	q2	OK	18.8405	18.05	-0.0618376	-0.138323	0.80655	0.85549	no
Lus10010372.g	scaffold740:218291-223078	q1	q2	OK	18.1856	23.5326	0.371865	0.902821	0.11255	0.188823	no
Lus10010392.g	scaffold583:236295-236964	q1	q2	NOTEST	0.489973	0	#NAME?	0	1	1	no
Lus10010513.g	scaffold680:60060-62712	q1	q2	OK	6.91399	6.22493	-0.151461	-0.297065	0.60585	0.689553	no
Lus10010791.g	scaffold239:48055-49589	q1	q2	OK	19.3363	38.1094	0.978834	2.10131	0.00025	0.0011337	yes
Lus10011026.g,Lus10011027.g	scaffold1035:180619-187394	q1	q2	OK	17.25	14.9825	-0.203324	-0.369057	0.51085	0.604515	no
Lus10011184.g	scaffold1376:61946-62681	q1	q2	OK	6.06589	46.766	2.94667	5.07042	5e-05	0.000268796	yes
Lus10011211.g	scaffold1376:168218-174349	q1	q2	OK	7.56287	6.40687	-0.239314	-0.558289	0.33025	0.429068	no
Lus10011309.g	scaffold1037:370233-374058	q1	q2	OK	2.50446	3.54405	0.500897	0.823486	0.14335	0.227507	no
Lus10011380.g	scaffold744:264162-264792	q1	q2	NOTEST	0	0	0	0	1	1	no
Lus10011390.g	scaffold744:307672-309541	q1	q2	OK	4.71856	15.4581	1.71195	2.53764	0.0002	0.00093316	yes
Lus10011391.g	scaffold744:315434-318296	q1	q2	OK	4.369	6.56482	0.587452	0.788996	0.16215	0.250179	no
Lus10011392.g	scaffold744:318786-319536	q1	q2	NOTEST	0.513304	0	#NAME?	0	1	1	no
Lus10011405.g	scaffold744:385625-388188	q1	q2	NOTEST	0.0163184	1.03124	5.98173	0	1	1	no
Lus10011416.g	scaffold744:437534-437942	q1	q2	OK	0.0788987	1.16609	3.88553	0.754273	0.12375	0.202987	no
Lus10011475.g	scaffold1578:306112-309292	q1	q2	OK	9.38211	10.7836	0.200861	0.435116	0.4424	0.540683	no
Lus10011702.g	scaffold476:447106-448306	q1	q2	NOTEST	0.0430886	0.0751935	0.803302	0	1	1	no
Lus10012033.g	scaffold931:249009-255367	q1	q2	NOTEST	0.790127	0	#NAME?	0	1	1	no
Lus10012062.g	scaffold931:387287-389016	q1	q2	OK	9.67138	23.9826	1.31019	2.37956	0.00015	0.000724673	yes
Lus10012198.g	scaffold1186:407192-413173	q1	q2	OK	48.4313	77.8866	0.685435	1.41506	0.0113	0.0292026	yes
Lus10012290.g	scaffold273:424948-427824	q1	q2	OK	4.0472	6.92638	0.775177	1.27058	0.0253	0.0570117	no
Lus10012332.g	scaffold572:182394-185507	q1	q2	OK	8.26661	7.8962	-0.0661385	-0.149033	0.7868	0.84026	no
Lus10012365.g	scaffold572:337651-341348	q1	q2	OK	18.0099	13.7812	-0.386082	-0.870667	0.1244	0.203829	no
Lus10012376.g	scaffold572:408896-409367	q1	q2	NOTEST	0	0.153464	inf	0	1	1	no
Lus10012628.g	scaffold101:305577-307945	q1	q2	NOTEST	0.247807	0.157278	-0.655897	0	1	1	no
Lus10012745.g	scaffold206:370025-372733	q1	q2	OK	0	11.2373	inf	nan	0.2125	0.308194	no
Lus10012791.g	scaffold604:243907-269049	q1	q2	OK	18.4426	26.6836	0.532912	1.11632	0.05005	0.0995116	no
Lus10012792.g,Lus10012793.g	scaffold604:243907-269049	q1	q2	OK	1.06874	4.68678	2.13269	0.885922	0.09865	0.17105	no
Lus10012811.g	scaffold604:424321-427473	q1	q2	OK	32.5195	328.67	3.33726	6.72155	5e-05	0.000268796	yes
Lus10012819.g,Lus10012822.g	scaffold1313:15491-22943	q1	q2	OK	11.9693	6.81976	-0.811549	-0.926118	0.1043	0.178891	no
Lus10012826.g	scaffold1313:38139-39786	q1	q2	OK	2.57442	11.6861	2.18248	2.91961	0.0003	0.00132802	yes
Lus10012867.g	scaffold1313:240816-251394	q1	q2	OK	5.09288	1.43426	-1.82817	-3.72932	5e-05	0.000268796	yes
Lus10012975.g	scaffold434:401029-402271	q1	q2	OK	0.348546	1.90118	2.44748	1.93088	0.01515	0.0372587	yes
Lus10012987.g	scaffold751:11830-13700	q1	q2	OK	2.67589	3.73533	0.481214	0.640513	0.2631	0.362307	no
Lus10013027.g	scaffold751:233656-236893	q1	q2	OK	9.21259	20.729	1.16997	2.20109	0.00025	0.0011337	yes
Lus10013144.g	scaffold359:204465-207549	q1	q2	OK	16.4024	19.6736	0.262361	0.563709	0.3193	0.417672	no
Lus10013210.g	scaffold372:97777-98584	q1	q2	OK	12.4961	225.173	4.17148	7.97429	5e-05	0.000268796	yes
Lus10013235.g	scaffold372:197178-199432	q1	q2	OK	22.5835	84.0888	1.89665	4.19539	5e-05	0.000268796	yes
Lus10013371.g	scaffold812:402714-404241	q1	q2	NOTEST	0.919411	0.788932	-0.220809	0	1	1	no
Lus10013374.g	scaffold812:415665-418758	q1	q2	OK	30.2653	39.0767	0.36864	0.896941	0.1122	0.188377	no
Lus10013397.g	scaffold230:7403-10057	q1	q2	OK	22.4401	53.3635	1.24978	2.87514	5e-05	0.000268796	yes
Lus10013449.g,Lus10013450.g,Lus10013451.g,Lus10013452.g	scaffold230:247269-268335	q1	q2	OK	15.4805	10.9846	-0.494969	-1.03403	0.06285	0.119545	no
Lus10013475.g	scaffold230:358664-361475	q1	q2	OK	7.53692	31.3299	2.05549	1.2262	0.12535	0.204992	no
Lus10013491.g	scaffold230:431983-437120	q1	q2	OK	7.7074	11.2901	0.550743	0.99873	0.08465	0.151305	no
Lus10013497.g	scaffold230:452373-456888	q1	q2	OK	34.2044	67.2258	0.974835	1.58527	0.007	0.0195045	yes
Lus10013606.g	scaffold62:505755-510110	q1	q2	OK	7.36069	31.3714	2.09153	1.11548	0.06575	0.124015	no
Lus10013618.g	scaffold317:61355-62258	q1	q2	OK	0.149578	16.8563	6.81624	3.6637	0.12515	0.204768	no
Lus10013738.g,Lus10013739.g	scaffold1168:271851-276758	q1	q2	OK	5.94157	5.90452	-0.00902273	-0.012367	0.98155	0.987306	no
Lus10013821.g	scaffold618:123649-127689	q1	q2	OK	5.95049	0.824424	-2.85155	-3.26912	5e-05	0.000268796	yes
Lus10014118.g	scaffold1247:479190-479885	q1	q2	OK	1.26809	1.93421	0.60908	0.477286	0.38235	0.481981	no
Lus10014366.g	scaffold176:21514-33787	q1	q2	OK	25.1306	27.3124	0.120109	0.254822	0.6541	0.730964	no
Lus10014526.g	scaffold107:139963-141079	q1	q2	OK	3.62927	6.83247	0.912729	1.40974	0.0164	0.0397628	yes
Lus10014749.g	scaffold584:491017-494728	q1	q2	OK	11.1954	3.42592	-1.70834	-2.79692	5e-05	0.000268796	yes
Lus10014823.g	scaffold184:420937-426431	q1	q2	OK	32.6913	29.3465	-0.155718	-0.383445	0.49975	0.594697	no
Lus10015046.g	scaffold54:137923-138844	q1	q2	OK	0.023768	17.3306	9.51008	1.34344	0.10945	0.185042	no
Lus10015080.g	scaffold54:428855-430524	q1	q2	OK	21.1653	138.515	2.71027	6.27012	5e-05	0.000268796	yes
Lus10015126.g	scaffold866:143125-144752	q1	q2	OK	25.3552	30.9335	0.286888	0.618454	0.27235	0.370758	no
Lus10015152.g	scaffold866:268378-268879	q1	q2	NOTEST	0	0.264208	inf	0	1	1	no
Lus10015167.g	scaffold866:348273-349245	q1	q2	OK	0.668057	7.99267	3.58064	3.47877	0.00105	0.00392827	yes
Lus10015213.g	scaffold866:554517-558668	q1	q2	OK	6.91962	7.86891	0.185472	0.409932	0.47395	0.570318	no
Lus10015260.g	scaffold924:188635-193629	q1	q2	OK	8.73181	4.24089	-1.04191	-2.28445	0.0001	0.000505029	yes
Lus10015273.g	scaffold924:258611-262076	q1	q2	OK	1.6673	6.5093	1.96499	2.35652	0.00145	0.00516445	yes
Lus10015502.g	scaffold860:272579-273767	q1	q2	OK	2.6059	0.611825	-2.09059	-1.93104	0.01005	0.0264527	yes
Lus10015503.g	scaffold860:281620-286010	q1	q2	OK	4.81489	12.0615	1.32483	2.79486	5e-05	0.000268796	yes
Lus10015506.g	scaffold860:294437-295856	q1	q2	OK	10.283	21.0735	1.03517	1.1929	0.03105	0.0675201	no
Lus10015722.g	scaffold430:55205-61239	q1	q2	OK	15.7342	56.6176	1.84734	3.17466	5e-05	0.000268796	yes
Lus10015732.g	scaffold430:128976-131128	q1	q2	OK	6.29254	5.61642	-0.163992	-0.213308	0.6969	0.766607	no
Lus10015837.g	scaffold175:35634-36039	q1	q2	NOTEST	0	0	0	0	1	1	no
Lus10015901.g	scaffold175:562068-563070	q1	q2	OK	0.235545	6.8793	4.86819	3.11867	0.0338	0.0724413	no
Lus10015986.g	scaffold172:95526-98466	q1	q2	OK	13.5809	19.2786	0.505422	1.12268	0.0451	0.0915068	no
Lus10016040.g	scaffold172:384339-384945	q1	q2	OK	4.97028	23.6311	2.24929	3.23183	5e-05	0.000268796	yes
Lus10016102.g	scaffold344:109782-112905	q1	q2	OK	5.58803	7.57726	0.439336	0.90682	0.10805	0.183968	no
Lus10016163.g	scaffold344:603676-604315	q1	q2	OK	0.290852	5.07297	4.12448	2.62358	0.0682	0.127622	no
Lus10016195.g	scaffold947:151268-153948	q1	q2	OK	2.59895	3.12838	0.267488	0.323598	0.5623	0.65117	no
Lus10016255.g	scaffold947:493029-496309	q1	q2	OK	8.4016	8.30506	-0.0166727	-0.0356912	0.9476	0.963018	no
Lus10016303.g	scaffold515:324785-326478	q1	q2	OK	9.90398	19.8306	1.00164	1.93245	0.00095	0.00359846	yes
Lus10016348.g	scaffold179:148735-151805	q1	q2	OK	17.1649	8.07492	-1.08794	-2.27704	0.00015	0.000724673	yes
Lus10016416.g	scaffold179:472632-475565	q1	q2	OK	28.1154	17.4613	-0.687202	-1.42305	0.01205	0.0307398	yes
Lus10016426.g	scaffold179:527645-530803	q1	q2	OK	38.1134	25.5569	-0.576587	-0.68044	0.20865	0.30358	no
Lus10016427.g	scaffold179:531825-532386	q1	q2	OK	0	1.53035	inf	nan	0.00035	0.0015175	yes
Lus10016428.g	scaffold179:538554-539031	q1	q2	NOTEST	0	0	0	0	1	1	no
Lus10016451.g,Lus10016453.g	scaffold279:36997-42625	q1	q2	OK	106.488	33.4022	-1.67267	-1.04707	0.0473	0.0950667	no
Lus10016541.g	scaffold279:432413-432902	q1	q2	NOTEST	0	0	0	0	1	1	no
Lus10016561.g	scaffold279:523376-525407	q1	q2	OK	53.0012	130.662	1.30174	3.08705	5e-05	0.000268796	yes
Lus10016796.g	scaffold903:544873-546395	q1	q2	OK	20.7558	97.2818	2.22865	4.64317	5e-05	0.000268796	yes
Lus10016817.g	scaffold903:616917-626678	q1	q2	OK	1.67126	0.993752	-0.749983	-0.621556	0.30455	0.402252	no
Lus10016924.g	scaffold235:45064-46090	q1	q2	NOTEST	0	0.0911058	inf	0	1	1	no
Lus10016936.g	scaffold235:246553-249959	q1	q2	OK	19.1949	19.0086	-0.0140672	-0.033431	0.956	0.968973	no
Lus10017092.g	scaffold216:152206-164157	q1	q2	OK	11.0868	8.2541	-0.425661	-0.706824	0.2139	0.309673	no
Lus10017197.g	scaffold117:108777-113334	q1	q2	OK	10.4044	1.62427	-2.67933	-1.37263	0.07075	0.131331	no
Lus10017253.g	scaffold117:393321-393726	q1	q2	OK	2.56919	9.53894	1.89251	1.57005	0.022	0.0508015	no
Lus10017382.g,Lus10017383.g	scaffold511:357065-361335	q1	q2	OK	22.7483	46.5491	1.03299	2.08706	0.0003	0.00132802	yes
Lus10017385.g	scaffold511:366833-369227	q1	q2	OK	22.6681	16.6626	-0.444051	-0.98447	0.08135	0.146568	no
Lus10017455.g	scaffold1253:58232-63275	q1	q2	OK	1.81515	3.76343	1.05196	1.84442	0.0021	0.00705285	yes
Lus10017510.g	scaffold1253:318253-318796	q1	q2	OK	0.214914	2.62506	3.61052	1.52199	0.16285	0.250989	no
Lus10017722.g	scaffold765:656308-656908	q1	q2	NOTEST	0.043018	0.189055	2.1358	0	1	1	no
Lus10017750.g	scaffold212:260791-264241	q1	q2	OK	3.39196	3.23071	-0.0702655	-0.116819	0.83355	0.876402	no
Lus10017764.g	scaffold212:528877-531718	q1	q2	OK	13.929	23.5585	0.758152	1.52975	0.0074	0.0204553	yes
Lus10017788.g	scaffold14:255507-258014	q1	q2	OK	7.49028	15.4844	1.04773	2.12329	0.00025	0.0011337	yes
Lus10017865.g	scaffold35:416772-418245	q1	q2	OK	5.75183	21.5979	1.9088	3.37297	5e-05	0.000268796	yes
Lus10017969.g	scaffold687:120748-145993	q1	q2	OK	11.6715	9.99303	-0.223999	-0.360048	0.51585	0.608945	no
Lus10017978.g	scaffold687:173103-177165	q1	q2	OK	13.799	26.4593	0.939214	1.90901	0.00055	0.00223999	yes
Lus10018110.g	scaffold112:135762-137679	q1	q2	OK	18.5018	39.0953	1.07933	2.46579	0.00015	0.000724673	yes
Lus10018125.g	scaffold112:290832-297064	q1	q2	OK	9.73062	9.46998	-0.0391699	-0.09378	0.87315	0.907341	no
Lus10018126.g	scaffold112:306338-312531	q1	q2	OK	15.916	16.9982	0.094902	0.230687	0.6813	0.753539	no
Lus10018140.g	scaffold112:406117-406804	q1	q2	NOTEST	0.0682101	0.566458	3.05391	0	1	1	no
Lus10018167.g	scaffold112:529442-530132	q1	q2	NOTEST	0.0187679	0	#NAME?	0	1	1	no
Lus10018271.g	scaffold163:295515-295935	q1	q2	NOTEST	0	0	0	0	1	1	no
Lus10018292.g	scaffold163:398058-398502	q1	q2	OK	0.053245	16.3485	8.2623	1.26244	0.11815	0.195663	no
Lus10018293.g	scaffold163:398902-401562	q1	q2	OK	4.41529	12.4575	1.49644	2.74474	5e-05	0.000268796	yes
Lus10018409.g	scaffold251:283288-285091	q1	q2	OK	32.9599	60.0629	0.865763	2.04609	0.00055	0.00223999	yes
Lus10018465.g	scaffold251:575023-581326	q1	q2	OK	7.45723	5.76466	-0.371402	-0.863807	0.1214	0.200029	no
Lus10018489.g	scaffold251:686808-688984	q1	q2	OK	8.3176	94.1642	3.50094	7.13058	5e-05	0.000268796	yes
Lus10018589.g	scaffold1308:463299-464809	q1	q2	OK	0.137027	9.6104	6.13207	2.80749	0.2783	0.376556	no
Lus10018609.g	scaffold1308:528845-536985	q1	q2	OK	13.401	6.09389	-1.1369	-1.58224	0.0064	0.0180899	yes
Lus10018613.g	scaffold1308:541961-548683	q1	q2	OK	6.77714	10.1356	0.580684	0.911869	0.111	0.186896	no
Lus10018817.g	scaffold103:13784-17803	q1	q2	OK	8.57848	1.05258	-3.02679	-4.58125	5e-05	0.000268796	yes
Lus10019018.g	scaffold257:80869-83237	q1	q2	OK	0.149982	10.0416	6.06506	3.46052	0.05725	0.111049	no
Lus10019075.g	scaffold30:2355-8293	q1	q2	OK	20.1547	32.8214	0.70352	1.10329	0.05785	0.111923	no
Lus10019102.g	scaffold30:144031-151970	q1	q2	OK	11.9985	16.4548	0.455655	0.548251	0.33445	0.433206	no
Lus10019150.g	scaffold30:389240-389663	q1	q2	OK	0.429012	4.76853	3.47445	2.05761	0.12575	0.205487	no
Lus10019507.g	scaffold906:560652-561228	q1	q2	OK	31.58	54.986	0.800053	1.7229	0.00355	0.0109975	yes
Lus10019685.g	scaffold420:310880-311369	q1	q2	OK	0	3.84071	inf	nan	5e-05	0.000268796	yes
Lus10019686.g	scaffold420:317238-317784	q1	q2	OK	0.965074	15.5868	4.01354	3.31347	0.00555	0.0160415	yes
Lus10019687.g	scaffold420:321045-324273	q1	q2	OK	25.9636	22.4019	-0.212871	-0.489508	0.38805	0.487879	no
Lus10019703.g	scaffold420:393694-396786	q1	q2	OK	19.4363	9.81097	-0.986284	-1.75324	0.00275	0.0088615	yes
Lus10019790.g	scaffold1491:56667-57366	q1	q2	OK	3.48047	6.25921	0.846699	0.969191	0.0865	0.153608	no
Lus10019837.g	scaffold1491:255757-257894	q1	q2	OK	19.0833	23.5271	0.302013	0.678704	0.2268	0.323515	no
Lus10019839.g	scaffold1491:267110-279710	q1	q2	OK	50.9888	62.0716	0.283754	0.63562	0.26675	0.365592	no
Lus10019973.g	scaffold23:185930-187112	q1	q2	OK	1.47644	0.912454	-0.694299	-0.649615	0.2505	0.349194	no
Lus10019974.g	scaffold23:193123-197120	q1	q2	OK	7.26252	18.1108	1.31831	2.9013	5e-05	0.000268796	yes
Lus10019979.g	scaffold23:209981-210476	q1	q2	OK	5.43753	6.08482	0.162261	0.179286	0.73895	0.801283	no
Lus10020031.g,Lus10020032.g,Lus10020033.g,Lus10020034.g	scaffold23:494789-519528	q1	q2	OK	39.0462	86.5136	1.14774	2.16154	0.0003	0.00132802	yes
Lus10020084.g	scaffold23:728544-739246	q1	q2	OK	6.66502	2.27397	-1.5514	-2.9377	5e-05	0.000268796	yes
Lus10020145.g	scaffold454:264954-268790	q1	q2	OK	3.13815	8.64313	1.46164	2.76864	5e-05	0.000268796	yes
Lus10020227.g,Lus10020228.g,Lus10020229.g	scaffold454:713426-734222	q1	q2	OK	14.0875	14.0941	0.000683475	0.00154641	0.9977	0.998313	no
Lus10020256.g	scaffold641:102609-105480	q1	q2	OK	49.3837	17.4232	-1.50302	-3.37124	5e-05	0.000268796	yes
Lus10020258.g	scaffold641:110272-115464	q1	q2	OK	5.18112	4.89839	-0.0809564	-0.103122	0.85535	0.893271	no
Lus10020349.g	scaffold641:507960-509227	q1	q2	OK	16.895	13.8676	-0.284876	-0.473952	0.39475	0.494586	no
Lus10020487.g	scaffold44:606211-608497	q1	q2	OK	9.14344	7.92319	-0.206656	-0.34033	0.5574	0.64698	no
Lus10020655.g	scaffold303:49347-52835	q1	q2	OK	33.058	30.6586	-0.10871	-0.23701	0.67365	0.747476	no
Lus10020859.g	scaffold711:278699-279467	q1	q2	NOTEST	0.0162375	0.199147	3.61643	0	1	1	no
Lus10020903.g	scaffold711:513183-519234	q1	q2	OK	26.6443	12.69	-1.07014	-2.48586	5e-05	0.000268796	yes
Lus10021063.g	scaffold155:345510-348172	q1	q2	OK	13.7367	11.7435	-0.226169	-0.479136	0.39505	0.494893	no
Lus10021113.g	scaffold155:576643-581275	q1	q2	OK	28.9983	9.02521	-1.68393	-1.69994	0.00825	0.0224058	yes
Lus10021197.g	scaffold11:484829-485840	q1	q2	OK	0.0114347	9.90354	9.75838	0.730762	0.0851	0.151633	no
Lus10021245.g	scaffold1123:96915-102304	q1	q2	OK	10.9584	25.013	1.19064	0.817944	0.1599	0.247559	no
Lus10021403.g	scaffold612:135005-139247	q1	q2	OK	7.18608	29.0992	2.0177	4.64033	5e-05	0.000268796	yes
Lus10021458.g	scaffold612:470757-474973	q1	q2	OK	6.61554	11.9155	0.848911	1.94743	0.0008	0.00309402	yes
Lus10021482.g	scaffold612:660584-666822	q1	q2	OK	8.93896	35.8994	2.00578	4.37253	5e-05	0.000268796	yes
Lus10021524.g	scaffold362:58735-59905	q1	q2	OK	3.71087	0.745787	-2.31492	-1.88573	0.01185	0.0303375	yes
Lus10021628.g	scaffold208:56768-214032	q1	q2	OK	7.46544	12.0946	0.696071	0.223499	0.6494	0.726935	no
Lus10021670.g	scaffold208:388035-391775	q1	q2	OK	26.8212	34.5783	0.366494	0.811853	0.14845	0.233749	no
Lus10021683.g	scaffold208:478439-482315	q1	q2	OK	8.59392	11.2052	0.382778	0.810856	0.1465	0.231369	no
Lus10021710.g	scaffold208:680473-686853	q1	q2	OK	4.9804	9.71692	0.964239	2.0296	0.0007	0.00275876	yes
Lus10021722.g	scaffold208:826499-829177	q1	q2	OK	5.6234	4.06069	-0.469719	-0.690763	0.22215	0.318441	no
Lus10021801.g	scaffold108:365736-369306	q1	q2	OK	8.46404	18.7367	1.14645	2.57544	5e-05	0.000268796	yes
Lus10021842.g	scaffold108:792178-792544	q1	q2	NOTEST	0.50138	0.25022	-1.00271	0	1	1	no
Lus10021953.g	scaffold164:729840-733508	q1	q2	OK	2.95139	6.07331	1.04109	1.88233	0.0017	0.00590528	yes
Lus10021954.g	scaffold164:733995-737736	q1	q2	OK	8.67434	6.54634	-0.406064	-0.923074	0.10695	0.182485	no
Lus10021993.g	scaffold87:204006-206526	q1	q2	NOTEST	0.0251946	0.0358685	0.509607	0	1	1	no
Lus10022223.g	scaffold225:205290-206010	q1	q2	NOTEST	0	0	0	0	1	1	no
Lus10022294.g	scaffold225:584575-586834	q1	q2	OK	1.64157	2.0893	0.347944	0.419498	0.4553	0.552493	no
Lus10022324.g	scaffold225:698114-699887	q1	q2	OK	14.935	2.62625	-2.50762	-4.00813	5e-05	0.000268796	yes
Lus10022405.g	scaffold38:344414-346455	q1	q2	OK	33.1305	76.8044	1.21303	2.90658	5e-05	0.000268796	yes
Lus10022449.g	scaffold38:587186-591802	q1	q2	OK	0.527331	1.42855	1.43778	1.78906	0.0051	0.0149567	yes
Lus10022567.g	scaffold465:791525-793919	q1	q2	OK	0.861225	22.4607	4.70487	6.11983	5e-05	0.000268796	yes
Lus10022569.g	scaffold465:804779-807176	q1	q2	OK	13.3161	17.9539	0.431125	0.658527	0.2456	0.344238	no
Lus10022585.g	scaffold59:40893-44240	q1	q2	OK	3.9356	42.9464	3.44788	6.42729	5e-05	0.000268796	yes
Lus10022743.g	scaffold59:743662-744223	q1	q2	OK	6.59283	10.1354	0.620439	0.826222	0.1381	0.221172	no
Lus10022774.g	scaffold8:44945-48029	q1	q2	OK	54.3367	36.0724	-0.591031	-1.11702	0.04575	0.092616	no
Lus10022895.g	scaffold8:650815-654388	q1	q2	OK	9.13427	0.454855	-4.32781	-5.02033	5e-05	0.000268796	yes
Lus10022967.g	scaffold355:434555-435753	q1	q2	OK	0.138216	3.13062	4.50146	2.1284	0.10795	0.183824	no
Lus10023055.g	scaffold325:164407-165704	q1	q2	OK	0.0354017	28.0411	9.62951	1.45614	0.1094	0.185042	no
Lus10023068.g	scaffold325:250384-257238	q1	q2	OK	8.88716	9.95137	0.163173	0.392979	0.4886	0.584475	no
Lus10023112.g	scaffold325:472191-475790	q1	q2	OK	9.69907	11.4257	0.23636	0.516142	0.36365	0.462834	no
Lus10023182.g	scaffold325:833300-834577	q1	q2	OK	35.8492	71.1074	0.988058	2.33108	5e-05	0.000268796	yes
Lus10023235.g	scaffold98:148258-149661	q1	q2	OK	11.8037	12.8813	0.126033	0.265076	0.6421	0.720925	no
Lus10023477.g	scaffold1216:373814-377530	q1	q2	OK	16.2741	22.4013	0.461002	1.11141	0.0479	0.0960626	no
Lus10023507.g	scaffold1216:542930-547583	q1	q2	OK	17.0633	27.3816	0.682309	1.6608	0.0032	0.0100575	yes
Lus10023527.g	scaffold1216:664497-667812	q1	q2	OK	11.0351	15.2219	0.464053	1.08489	0.05615	0.109318	no
Lus10023617.g	scaffold505:186361-188126	q1	q2	OK	3.48038	1.62181	-1.10164	-1.3649	0.0218	0.0504078	no
Lus10023671.g	scaffold505:457101-466572	q1	q2	OK	9.56832	6.62551	-0.530234	-1.19708	0.0351	0.0747804	no
Lus10023914.g	scaffold177:492347-497234	q1	q2	OK	6.24936	52.6044	3.07341	5.527	5e-05	0.000268796	yes
Lus10024057.g	scaffold353:266852-275215	q1	q2	OK	7.102	7.05445	-0.00969085	-0.0221226	0.96855	0.978126	no
Lus10024116.g	scaffold353:581578-585434	q1	q2	OK	18.0987	19.4271	0.102186	0.243788	0.6585	0.734759	no
Lus10024124.g	scaffold353:643330-643888	q1	q2	OK	1.13671	3.07599	1.43618	1.08265	0.07755	0.140969	no
Lus10024135.g,Lus10024136.g	scaffold353:702268-719279	q1	q2	OK	3.02987	2.24119	-0.434994	-0.614595	0.27455	0.372859	no
Lus10024372.g	scaffold16:569089-570231	q1	q2	OK	3.99408	5.10728	0.354693	0.519748	0.35475	0.454021	no
Lus10024405.g	scaffold16:753622-754156	q1	q2	NOTEST	0	0	0	0	1	1	no
Lus10024629.g	scaffold349:431012-431456	q1	q2	NOTEST	0	0	0	0	1	1	no
Lus10024635.g	scaffold349:455281-457486	q1	q2	OK	8.84201	19.0302	1.10585	2.34813	0.0001	0.000505029	yes
Lus10024657.g	scaffold349:585594-586134	q1	q2	OK	4.44497	88.1575	4.30984	5.93664	5e-05	0.000268796	yes
Lus10024759.g	scaffold320:496628-499802	q1	q2	OK	9.63924	10.8996	0.177284	0.362295	0.5188	0.61136	no
Lus10024810.g	scaffold473:136621-141163	q1	q2	OK	10.384	8.82146	-0.235274	-0.533665	0.3436	0.4425	no
Lus10024881.g	scaffold473:541743-543175	q1	q2	OK	1.68543	24.1735	3.84224	5.0218	0.0001	0.000505029	yes
Lus10025031.g	scaffold294:870884-880809	q1	q2	OK	0.374378	8.25041	4.4619	2.22104	0.04545	0.0921179	no
Lus10025071.g	scaffold305:114167-118522	q1	q2	OK	6.16347	4.31669	-0.513816	-1.14697	0.04105	0.084855	no
Lus10025145.g	scaffold305:522351-522804	q1	q2	NOTEST	0.0650423	0	#NAME?	0	1	1	no
Lus10025146.g	scaffold305:524408-524927	q1	q2	NOTEST	0.488067	1.0201	1.06356	0	1	1	no
Lus10025162.g	scaffold305:591955-592495	q1	q2	OK	1.17809	23.7706	4.33466	4.01548	0.00125	0.00455622	yes
Lus10025228.g	scaffold339:73516-73966	q1	q2	NOTEST	0.286038	0.318439	0.154807	0	1	1	no
Lus10025338.g	scaffold339:800653-801172	q1	q2	NOTEST	0	0.130412	inf	0	1	1	no
Lus10025394.g	scaffold46:436281-437688	q1	q2	OK	0.899601	1.71202	0.928344	0.778272	0.1748	0.264796	no
Lus10025563.g	scaffold145:411449-412001	q1	q2	OK	0.141577	5.16057	5.18787	2.27941	0.2137	0.309458	no
Lus10025566.g	scaffold145:426546-432897	q1	q2	OK	25.1342	49.1008	0.966095	2.22543	0.0001	0.000505029	yes
Lus10025612.g	scaffold145:650264-655217	q1	q2	NOTEST	0	0	0	0	1	1	no
Lus10025671.g	scaffold145:922823-923677	q1	q2	NOTEST	0	0	0	0	1	1	no
Lus10025691.g	scaffold145:1016693-1017380	q1	q2	OK	0.102242	1.57621	3.9464	1.5946	0.0692	0.129028	no
Lus10025921.g	scaffold605:943464-944508	q1	q2	NOTEST	0.288038	0.0592317	-2.28182	0	1	1	no
Lus10025930.g	scaffold605:983009-985188	q1	q2	OK	7.85735	9.78378	0.316349	0.608625	0.28245	0.380577	no
Lus10026104.g	scaffold319:699247-700673	q1	q2	OK	4.07996	13.6181	1.73889	2.84269	0.00015	0.000724673	yes
Lus10026226.g	scaffold898:233351-236742	q1	q2	OK	8.5189	13.097	0.620503	1.36737	0.01545	0.0378511	yes
Lus10026380.g	scaffold898:856334-866009	q1	q2	OK	8.9623	12.0398	0.425872	0.981018	0.08495	0.151633	no
Lus10026420.g	scaffold898:1019462-1030278	q1	q2	OK	4.3432	2.82481	-0.620604	-1.4102	0.01535	0.0376421	yes
Lus10026501.g	scaffold617:110250-113204	q1	q2	OK	0.733596	13.6127	4.21383	5.15437	5e-05	0.000268796	yes
Lus10026648.g	scaffold617:816676-822632	q1	q2	OK	1.28971	1.95702	0.601614	0.634411	0.2696	0.368063	no
Lus10026856.g	scaffold651:179613-190650	q1	q2	OK	23.0953	19.3543	-0.254949	-0.616958	0.2747	0.372966	no
Lus10026941.g	scaffold651:689153-692960	q1	q2	OK	3.47439	10.3782	1.57873	3.07288	5e-05	0.000268796	yes
Lus10027023.g	scaffold297:126252-126777	q1	q2	NOTEST	0	0.256016	inf	0	1	1	no
Lus10027027.g	scaffold297:145477-151887	q1	q2	OK	32.6265	55.1204	0.756541	1.73601	0.00245	0.00803195	yes
Lus10027441.g	scaffold96:362586-365274	q1	q2	OK	9.14474	15.3545	0.747646	1.61813	0.0049	0.0144553	yes
Lus10027736.g	scaffold1143:154670-155153	q1	q2	NOTEST	0	0	0	0	1	1	no
Lus10027744.g	scaffold1143:190881-192556	q1	q2	OK	0.348007	1.90435	2.45211	1.49429	0.0455	0.0922036	no
Lus10027890.g	scaffold1143:799973-805860	q1	q2	OK	20.9671	4.43858	-2.23996	-4.81676	5e-05	0.000268796	yes
Lus10027921.g	scaffold1143:967234-969542	q1	q2	OK	23.2452	43.4048	0.900925	1.91388	0.0012	0.00439587	yes
Lus10027994.g	scaffold132:237258-240388	q1	q2	OK	10.9941	17.4655	0.667786	1.46535	0.00975	0.0257919	yes
Lus10028009.g	scaffold132:313260-313722	q1	q2	NOTEST	0	0	0	0	1	1	no
Lus10028063.g	scaffold132:595313-596387	q1	q2	NOTEST	0.0975937	0.936115	3.26183	0	1	1	no
Lus10028249.g	scaffold327:855417-856692	q1	q2	OK	25.5385	19.4398	-0.393663	-0.751552	0.17805	0.268235	no
Lus10028406.g	scaffold413:513809-515194	q1	q2	OK	2.1526	4.17445	0.955508	1.02724	0.0814	0.146644	no
Lus10028442.g,Lus10028443.g	scaffold413:658076-661930	q1	q2	OK	8.63376	9.03603	0.0657	0.135112	0.7962	0.84737	no
Lus10028454.g,Lus10028455.g	scaffold413:712587-716334	q1	q2	OK	5.04448	3.95153	-0.352294	-0.459071	0.36305	0.462268	no
Lus10028560.g	scaffold346:109680-115912	q1	q2	OK	5.67012	6.06764	0.0977574	0.209983	0.70825	0.775879	no
Lus10028597.g	scaffold346:314098-319251	q1	q2	OK	43.661	78.774	0.851375	1.85988	0.0017	0.00590528	yes
Lus10028773.g	scaffold540:185669-186173	q1	q2	NOTEST	0.0455459	0.124753	1.45368	0	1	1	no
Lus10028790.g	scaffold540:285397-294111	q1	q2	OK	5.00476	5.59748	0.161477	0.365412	0.5187	0.611282	no
Lus10028827.g	scaffold540:443979-458528	q1	q2	OK	1.08901	2.34074	1.10396	0.778557	0.2078	0.302564	no
Lus10029037.g	scaffold376:205041-205560	q1	q2	OK	0.108102	1.98223	4.19666	1.41432	0.2735	0.371717	no
Lus10029136.g	scaffold376:715211-718081	q1	q2	OK	6.13452	15.5377	1.34076	2.26768	0.00025	0.0011337	yes
Lus10029178.g	scaffold376:916842-917925	q1	q2	OK	5.91056	3.00788	-0.974551	-1.39456	0.01855	0.0440463	yes
Lus10029242.g	scaffold360:159964-161367	q1	q2	OK	0.297631	5.67864	4.25395	2.71481	0.0429	0.0879087	no
Lus10029245.g	scaffold360:168903-172770	q1	q2	OK	0.0694153	62.0899	9.80489	6.37362	0.03085	0.0671789	no
Lus10029292.g	scaffold360:490523-492753	q1	q2	OK	8.37174	6.6759	-0.326565	-0.661603	0.2419	0.340382	no
Lus10029351.g	scaffold360:786385-788873	q1	q2	OK	4.89847	4.72457	-0.0521468	-0.0798598	0.8863	0.917125	no
Lus10029456.g	scaffold55:63867-64194	q1	q2	NOTEST	0.672421	0.326732	-1.04126	0	1	1	no
Lus10029582.g	scaffold418:89336-92153	q1	q2	OK	10	29.5816	1.5647	3.2109	5e-05	0.000268796	yes
Lus10029693.g	scaffold418:725331-726090	q1	q2	OK	0.580281	3.97414	2.77582	2.13752	0.02125	0.0492919	yes
Lus10029794.g	scaffold416:33076-34420	q1	q2	NOTEST	0	0.109228	inf	0	1	1	no
Lus10029886.g	scaffold416:508946-512431	q1	q2	OK	29.0475	39.1477	0.430512	0.943643	0.09525	0.166208	no
Lus10029940.g	scaffold416:745727-747143	q1	q2	OK	3.39464	1.77407	-0.936196	-1.03781	0.05765	0.11159	no
Lus10029990.g	scaffold416:961136-966643	q1	q2	OK	11.5738	7.70161	-0.587631	-1.16648	0.03985	0.082881	no
Lus10029993.g	scaffold416:996290-996632	q1	q2	OK	3.07055	10.225	1.73553	1.46934	0.02765	0.0613699	no
Lus10030044.g	scaffold416:1215340-1221124	q1	q2	OK	5.87848	2.10364	-1.48256	-2.95933	5e-05	0.000268796	yes
Lus10030117.g	scaffold19:945508-951291	q1	q2	OK	4.60913	10.2591	1.15434	1.3433	0.0273	0.060702	no
Lus10030120.g	scaffold19:977136-978023	q1	q2	OK	1.86727	29.0679	3.96042	4.33401	0.0001	0.000505029	yes
Lus10030198.g,Lus10030199.g	scaffold217:181517-190903	q1	q2	OK	7.45539	5.09211	-0.550022	-0.668159	0.24725	0.345847	no
Lus10030248.g	scaffold217:424651-429488	q1	q2	OK	22.5186	27.7055	0.299054	0.620333	0.27415	0.372417	no
Lus10030375.g	scaffold217:1109634-1111451	q1	q2	OK	11.8302	20.3763	0.784415	1.66923	0.0039	0.0119252	yes
Lus10030464.g	scaffold917:244174-244903	q1	q2	OK	6.32765	4.3354	-0.545505	-0.717645	0.2119	0.307498	no
Lus10030472.g	scaffold917:274609-276988	q1	q2	OK	2.50701	17.9104	2.83676	4.74126	5e-05	0.000268796	yes
Lus10030512.g	scaffold917:505410-508197	q1	q2	NOTEST	0.335055	0.369461	0.141022	0	1	1	no
Lus10030597.g	scaffold917:927604-942132	q1	q2	NOTEST	0	0.105028	inf	0	1	1	no
Lus10030599.g	scaffold917:927604-942132	q1	q2	OK	1.54912	3.01343	0.959958	0.595183	0.2963	0.393866	no
Lus10030699.g,Lus10030700.g	scaffold373:176876-181972	q1	q2	OK	9.64316	17.1332	0.829219	1.27616	0.02665	0.0595225	no
Lus10030728.g	scaffold373:296299-296920	q1	q2	OK	24.7266	274.961	3.47509	7.36541	5e-05	0.000268796	yes
Lus10030755.g	scaffold373:398890-401222	q1	q2	OK	30.9153	103.801	1.74743	4.02089	5e-05	0.000268796	yes
Lus10030891.g	scaffold373:1064267-1070384	q1	q2	OK	4.62509	9.9053	1.09872	1.16657	0.04835	0.0968188	no
Lus10030972.g	scaffold261:315659-316634	q1	q2	NOTEST	0	0	0	0	1	1	no
Lus10031152.g	scaffold977:278408-283336	q1	q2	OK	9.04418	19.9508	1.14138	2.63148	5e-05	0.000268796	yes
Lus10031202.g	scaffold977:577668-578852	q1	q2	OK	65.9499	59.3239	-0.152757	-0.372114	0.51695	0.609882	no
Lus10031275.g	scaffold977:916820-918936	q1	q2	OK	8.43409	10.5448	0.322233	0.478497	0.39315	0.492909	no
Lus10031422.g	scaffold863:266176-268306	q1	q2	OK	10.9443	36.9287	1.75457	3.94212	5e-05	0.000268796	yes
Lus10031468.g	scaffold863:435474-439220	q1	q2	OK	16.498	14.6382	-0.172555	-0.378823	0.4945	0.589644	no
Lus10031491.g	scaffold863:536506-538665	q1	q2	OK	7.76311	20.8777	1.42725	2.89283	5e-05	0.000268796	yes
Lus10031515.g	scaffold863:649868-650944	q1	q2	OK	1.6093	18.5851	3.52964	4.55814	5e-05	0.000268796	yes
Lus10031549.g	scaffold863:823030-825286	q1	q2	OK	17.5029	21.5812	0.302188	0.62651	0.2735	0.371717	no
Lus10031618.g	scaffold863:1111574-1119650	q1	q2	OK	10.7393	8.72708	-0.299323	-0.718024	0.2031	0.297085	no
Lus10031728.g	scaffold783:426768-431727	q1	q2	OK	8.47104	23.3101	1.46035	3.15831	5e-05	0.000268796	yes
Lus10031780.g	scaffold783:676129-677309	q1	q2	OK	13.4359	33.8225	1.33189	2.85732	5e-05	0.000268796	yes
Lus10031993.g	scaffold42:434716-438655	q1	q2	OK	27.2909	28.078	0.0410218	0.086766	0.87845	0.911237	no
Lus10032161.g	scaffold42:1177128-1179915	q1	q2	OK	7.29946	14.0833	0.948128	2.05669	0.0006	0.00241292	yes
Lus10032265.g	scaffold291:387227-387680	q1	q2	NOTEST	0	0	0	0	1	1	no
Lus10032270.g	scaffold291:410497-413133	q1	q2	OK	8.60266	20.426	1.24755	2.19396	0.00025	0.0011337	yes
Lus10032290.g	scaffold291:506868-556239	q1	q2	OK	7.68046	87.2269	3.50551	2.59051	0.0034	0.0105878	yes
Lus10032382.g	scaffold291:1042400-1045751	q1	q2	OK	0	2.67943	inf	nan	5e-05	0.000268796	yes
Lus10032402.g	scaffold291:1133920-1141241	q1	q2	OK	9.2719	8.67588	-0.0958544	-0.228369	0.6865	0.757911	no
Lus10032418.g	scaffold291:1206993-1209534	q1	q2	OK	1.88601	35.897	4.25046	6.1216	5e-05	0.000268796	yes
Lus10032471.g	scaffold140:290514-298431	q1	q2	OK	16.9979	20.6583	0.281369	0.579696	0.30255	0.400392	no
Lus10033053.g	scaffold306:422698-426069	q1	q2	OK	19.4498	25.7822	0.406616	0.868643	0.1248	0.204335	no
Lus10033075.g	scaffold306:804068-807571	q1	q2	OK	5.10875	5.56572	0.123597	0.259244	0.6412	0.720207	no
Lus10033252.g	scaffold488:235777-238372	q1	q2	OK	10.916	11.6073	0.0885955	0.152232	0.7842	0.838282	no
Lus10033425.g	scaffold488:1292707-1293259	q1	q2	NOTEST	0	0	0	0	1	1	no
Lus10033472.g	scaffold701:135244-141306	q1	q2	OK	29.7662	27.6566	-0.106049	-0.244044	0.67155	0.745792	no
Lus10033515.g	scaffold701:345524-346265	q1	q2	OK	0.562503	9.41517	4.06505	3.16656	0.00575	0.0165263	yes
Lus10033682.g	scaffold701:1088623-1089223	q1	q2	NOTEST	0	0	0	0	1	1	no
Lus10033697.g	scaffold701:1161531-1163418	q1	q2	OK	0.866819	24.6187	4.82788	4.56785	5e-05	0.000268796	yes
Lus10033725.g	scaffold701:1298532-1306780	q1	q2	OK	17.1447	16.131	-0.0879287	-0.18782	0.7388	0.801145	no
Lus10033860.g	scaffold222:666556-669335	q1	q2	OK	12.5571	5.12276	-1.29351	-2.40206	0.0003	0.00132802	yes
Lus10033969.g	scaffold292:256915-258875	q1	q2	OK	11.4202	32.1245	1.49209	2.91093	5e-05	0.000268796	yes
Lus10033985.g	scaffold292:356715-367027	q1	q2	OK	29.9182	25.4592	-0.232836	-0.487565	0.39235	0.492112	no
Lus10034030.g	scaffold292:628183-630639	q1	q2	OK	10.6113	33.5949	1.66265	3.62454	5e-05	0.000268796	yes
Lus10034049.g	scaffold292:806175-808750	q1	q2	OK	12.7098	7.49901	-0.761168	-1.61529	0.0047	0.0139548	yes
Lus10034088.g	scaffold292:1049804-1053940	q1	q2	OK	6.68297	0.633672	-3.39868	-4.15095	5e-05	0.000268796	yes
Lus10034153.g	scaffold292:1372218-1372737	q1	q2	NOTEST	0	0.617273	inf	0	1	1	no
Lus10034157.g	scaffold292:1385429-1388342	q1	q2	OK	31.11	62.4115	1.00443	2.15887	0.0003	0.00132802	yes
Lus10034165.g	scaffold292:1420602-1423120	q1	q2	OK	7.76526	13.1532	0.76031	1.5422	0.00745	0.0205665	yes
Lus10034346.g	scaffold310:780009-789576	q1	q2	OK	6.18519	10.9737	0.827163	1.33824	0.02605	0.0583861	no
Lus10034367.g	scaffold310:918669-922717	q1	q2	OK	20.4971	41.8948	1.03135	2.27793	0.00015	0.000724673	yes
Lus10034407.g	scaffold310:1153683-1154097	q1	q2	OK	0.952099	1.50566	0.661215	0.415365	0.5345	0.625605	no
Lus10034454.g	scaffold310:1389840-1393488	q1	q2	OK	47.5192	40.4654	-0.231822	-0.330947	0.5432	0.63343	no
Lus10034470.g,Lus10034471.g,Lus10034472.g	scaffold310:1481017-1492483	q1	q2	OK	14.6963	14.1327	-0.0564227	-0.0663843	0.8646	0.900623	no
Lus10034551.g	scaffold9:525562-525928	q1	q2	OK	1.38743	7.4472	2.42429	1.68904	0.03445	0.073588	no
Lus10034587.g	scaffold9:739141-787886	q1	q2	OK	15.2148	26.0668	0.77674	1.26277	0.0315	0.0683288	no
Lus10034640.g	scaffold9:1161481-1164801	q1	q2	OK	5.01929	10.6825	1.08969	2.01092	0.0008	0.00309402	yes
Lus10034644.g	scaffold9:1182059-1184719	q1	q2	OK	5.65308	4.73766	-0.254862	-0.366761	0.506	0.600202	no
Lus10034667.g,Lus10034668.g	scaffold9:1312411-1316729	q1	q2	OK	7.96372	16.9221	1.0874	1.94953	0.00135	0.00487022	yes
Lus10034793.g	scaffold66:522077-523074	q1	q2	OK	10.3508	16.9137	0.70845	1.35885	0.0155	0.0379581	yes
Lus10034832.g	scaffold66:823391-830529	q1	q2	OK	6.80644	16.0532	1.23789	2.34202	5e-05	0.000268796	yes
Lus10034953.g	scaffold29:642508-643681	q1	q2	NOTEST	0.196814	0.162897	-0.272868	0	1	1	no
Lus10035010.g	scaffold43:11153-14378	q1	q2	OK	50.9462	62.7822	0.301382	0.674839	0.2409	0.339241	no
Lus10035023.g	scaffold43:76733-83209	q1	q2	OK	5.23377	11.1564	1.09194	1.38915	0.01895	0.0448032	yes
Lus10035057.g	scaffold43:284970-289730	q1	q2	OK	5.67938	6.85762	0.271975	0.526413	0.3493	0.448487	no
Lus10035163.g	scaffold43:883781-887987	q1	q2	OK	8.86375	10.2433	0.208693	0.470845	0.40985	0.509287	no
Lus10035271.g	scaffold43:1623801-1626839	q1	q2	OK	6.02691	11.9287	0.984943	1.54286	0.00925	0.0246859	yes
Lus10035332.g	scaffold151:283523-289226	q1	q2	OK	9.34244	4.89061	-0.933785	-1.75753	0.00315	0.0099204	yes
Lus10035335.g	scaffold151:318036-318372	q1	q2	OK	7.51929	14.2543	0.92273	0.966853	0.1095	0.185065	no
Lus10035368.g	scaffold151:460492-461467	q1	q2	NOTEST	0	0	0	0	1	1	no
Lus10035549.g	scaffold464:227985-229022	q1	q2	OK	0.135436	1.64168	3.59949	1.46621	0.0799	0.144369	no
Lus10035553.g	scaffold464:248717-258482	q1	q2	OK	20.9303	13.3071	-0.653392	-1.59917	0.0048	0.0142058	yes
Lus10035677.g	scaffold464:865017-875194	q1	q2	OK	8.11903	9.82272	0.274815	0.252701	0.65865	0.734881	no
Lus10035820.g	scaffold464:1471961-1473096	q1	q2	OK	1.21338	0.704273	-0.784826	-0.657939	0.24515	0.343701	no
Lus10035857.g	scaffold464:1655449-1663455	q1	q2	OK	3.37914	2.66159	-0.344366	-0.690068	0.221	0.317312	no
Lus10035931.g	scaffold76:314658-315207	q1	q2	NOTEST	0.0904608	0	#NAME?	0	1	1	no
Lus10036034.g	scaffold76:822375-824409	q1	q2	OK	68.7998	79.2725	0.204415	0.499013	0.3785	0.477985	no
Lus10036128.g	scaffold76:1363311-1365996	q1	q2	OK	5.91274	6.5287	0.142967	0.273958	0.62305	0.704589	no
Lus10036151.g	scaffold76:1507752-1514167	q1	q2	OK	16.0129	1.91263	-3.0656	-5.50297	5e-05	0.000268796	yes
Lus10036202.g	scaffold27:136303-139743	q1	q2	OK	8.4413	25.3461	1.58623	3.52458	5e-05	0.000268796	yes
Lus10036378.g	scaffold57:359119-359722	q1	q2	OK	0.949172	4.58015	2.27065	1.93989	0.0177	0.0423958	yes
Lus10036380.g	scaffold57:373243-373720	q1	q2	NOTEST	0	0	0	0	1	1	no
Lus10036404.g	scaffold57:502622-502991	q1	q2	OK	5.61738	3.98732	-0.494477	-0.41751	0.45805	0.555098	no
Lus10036466.g	scaffold57:748865-750038	q1	q2	NOTEST	0	0	0	0	1	1	no
Lus10036569.g	scaffold57:1268220-1270231	q1	q2	OK	9.0475	17.7886	0.975362	2.12919	0.00065	0.00258759	yes
Lus10036754.g	scaffold31:436317-473626	q1	q2	OK	5.08929	5.59359	0.136309	0.0595403	0.90875	0.934262	no
Lus10036757.g	scaffold31:474621-475245	q1	q2	OK	2.13703	5.19101	1.28041	1.29654	0.0336	0.0720902	no
Lus10036764.g	scaffold31:518728-520850	q1	q2	OK	4.8503	7.8833	0.700725	1.09286	0.05385	0.105626	no
Lus10036934.g	scaffold31:1280495-1289129	q1	q2	OK	6.66461	25.7344	1.94911	2.31752	0.0019	0.00647025	yes
Lus10036937.g	scaffold31:1302490-1304219	q1	q2	OK	17.7617	32.7821	0.884143	1.83123	0.0027	0.00872862	yes
Lus10037053.g	scaffold462:16051-28622	q1	q2	OK	5.45205	30.5413	2.48589	2.11217	0.00975	0.0257919	yes
Lus10037162.g	scaffold462:462750-477394	q1	q2	OK	67.4328	158.497	1.23293	2.20374	0.0003	0.00132802	yes
Lus10037170.g	scaffold462:528217-528844	q1	q2	OK	1.86871	4.12714	1.1431	1.08785	0.06375	0.120936	no
Lus10037172.g	scaffold462:540651-542010	q1	q2	OK	6.5103	11.5614	0.828515	1.35731	0.0225	0.051766	no
Lus10037264.g	scaffold462:1039568-1045203	q1	q2	OK	4.93427	6.31547	0.356052	0.357511	0.53575	0.626679	no
Lus10037391.g,Lus10037392.g	scaffold462:1634310-1638604	q1	q2	OK	3.13097	0.457639	-2.77433	-1.43965	0.00375	0.0115334	yes
Lus10037410.g	scaffold462:1710058-1712657	q1	q2	OK	12.129	26.2244	1.11245	2.53313	5e-05	0.000268796	yes
Lus10037411.g,Lus10037412.g	scaffold462:1715094-1723849	q1	q2	OK	20.5085	47.4893	1.21138	2.19354	0.0001	0.000505029	yes
Lus10037490.g,Lus10037492.g	scaffold196:235055-241726	q1	q2	OK	15.7564	21.7866	0.467503	0.659246	0.22505	0.321582	no
Lus10037580.g	scaffold196:620908-623466	q1	q2	OK	8.68057	6.51982	-0.412958	-0.710822	0.2125	0.308194	no
Lus10037812.g	scaffold196:1684822-1692813	q1	q2	OK	12.3494	5.71245	-1.11226	-1.67827	0.0051	0.0149567	yes
Lus10037906.g	scaffold475:292408-300288	q1	q2	OK	2.21794	0.871111	-1.34829	-0.807642	0.1454	0.230088	no
Lus10037928.g	scaffold475:399218-404663	q1	q2	OK	6.10676	12.0825	0.984442	2.20665	0.00035	0.0015175	yes
Lus10038048.g	scaffold475:1016228-1020000	q1	q2	OK	20.2065	19.6801	-0.0380775	-0.090621	0.87375	0.907754	no
Lus10038095.g	scaffold475:1507678-1510770	q1	q2	OK	17.4432	17.3162	-0.0105377	-0.02436	0.9632	0.974397	no
Lus10038169.g	scaffold28:128141-136690	q1	q2	OK	5.84149	6.04482	0.0493625	0.0831303	0.8822	0.914043	no
Lus10038180.g	scaffold28:177411-178462	q1	q2	NOTEST	0.183645	0	#NAME?	0	1	1	no
Lus10038341.g	scaffold28:786346-790023	q1	q2	OK	10.5723	25.9189	1.29372	3.02683	5e-05	0.000268796	yes
Lus10038632.g	scaffold37:956371-964419	q1	q2	NOTEST	1.00984	0.217423	-2.21555	0	1	1	no
Lus10038656.g	scaffold37:1248890-1255878	q1	q2	OK	9.97933	13.4966	0.435577	1.03602	0.06275	0.119399	no
Lus10038731.g	scaffold34:32098-35434	q1	q2	OK	25.1743	3.36081	-2.90507	-5.57455	5e-05	0.000268796	yes
Lus10039001.g	scaffold34:1217649-1220568	q1	q2	OK	6.30172	4.84998	-0.377768	-0.789475	0.1554	0.242214	no
Lus10039127.g	scaffold34:1770447-1773864	q1	q2	OK	13.0856	2.60329	-2.32957	-4.27353	5e-05	0.000268796	yes
Lus10039202.g	scaffold34:2080389-2083573	q1	q2	OK	8.38043	10.5291	0.329289	0.585442	0.29825	0.3959	no
Lus10039607.g	scaffold15:729543-736017	q1	q2	OK	11.8751	25.5621	1.10607	2.57851	5e-05	0.000268796	yes
Lus10039634.g,Lus10039635.g	scaffold15:897213-899993	q1	q2	OK	8.69672	37.1617	2.09527	4.18838	5e-05	0.000268796	yes
Lus10039821.g	scaffold15:1779613-1781430	q1	q2	OK	2.1222	74.9752	5.14278	6.6838	5e-05	0.000268796	yes
Lus10039845.g	scaffold15:1880127-1888945	q1	q2	OK	10.0695	6.11055	-0.720624	-1.02254	0.07345	0.135146	no
Lus10039848.g	scaffold15:1894399-1901110	q1	q2	OK	6.63545	8.69169	0.389444	0.666584	0.22165	0.317915	no
Lus10040151.g	scaffold86:448580-449093	q1	q2	NOTEST	0.0290351	0.265815	3.19455	0	1	1	no
Lus10040240.g	scaffold86:913614-915572	q1	q2	OK	27.0612	22.969	-0.23654	-0.46509	0.4071	0.506642	no
Lus10040278.g	scaffold86:1120907-1122957	q1	q2	OK	5.26808	14.7965	1.48991	2.18507	5e-05	0.000268796	yes
Lus10040359.g	scaffold86:1506485-1510414	q1	q2	OK	13.4447	17.1082	0.347647	0.817719	0.1491	0.234608	no
Lus10040389.g	scaffold86:1671950-1676532	q1	q2	OK	21.7075	44.5811	1.03824	2.49878	0.0001	0.000505029	yes
Lus10040413.g	scaffold86:1794766-1799317	q1	q2	OK	11.1951	15.5106	0.470394	1.00458	0.0745	0.136581	no
Lus10040613.g	scaffold156:692422-693631	q1	q2	OK	17.2262	31.9915	0.893089	2.00206	0.0004	0.00170379	yes
Lus10040617.g	scaffold156:716278-716725	q1	q2	OK	6.78169	12.7288	0.90838	1.11738	0.06325	0.120165	no
Lus10040716.g	scaffold156:1145103-1149155	q1	q2	OK	45.9292	18.1656	-1.3382	-1.46186	0.0098	0.0258993	yes
Lus10040783.g	scaffold156:1400526-1401330	q1	q2	OK	5.97915	15.1192	1.33837	2.19336	0.0009	0.00343081	yes
Lus10040829.g	scaffold156:1677868-1680444	q1	q2	OK	49.315	172.216	1.80412	3.44238	5e-05	0.000268796	yes
Lus10040914.g	scaffold280:102405-113585	q1	q2	OK	19.9751	25.4609	0.350084	0.664574	0.2562	0.355371	no
Lus10040942.g	scaffold280:253228-253789	q1	q2	OK	4.57572	24.1822	2.40187	3.23261	5e-05	0.000268796	yes
Lus10041008.g	scaffold280:530739-537983	q1	q2	OK	9.45306	4.02623	-1.23135	-2.75353	5e-05	0.000268796	yes
Lus10041063.g	scaffold280:793607-807400	q1	q2	OK	36.2496	40.9656	0.176447	0.371616	0.50545	0.599768	no
Lus10041079.g	scaffold280:872155-873906	q1	q2	OK	4.35906	6.39012	0.551827	0.695943	0.2137	0.309458	no
Lus10041134.g	scaffold280:1111233-1112412	q1	q2	NOTEST	0	0	0	0	1	1	no
Lus10041156.g	scaffold280:1215285-1220823	q1	q2	OK	7.46768	0.370985	-4.33123	-5.65874	5e-05	0.000268796	yes
Lus10041300.g	scaffold280:1839888-1841924	q1	q2	OK	9.67869	41.3322	2.09438	4.31917	5e-05	0.000268796	yes
Lus10041301.g	scaffold280:1843398-1853210	q1	q2	OK	28.2884	24.339	-0.21694	-0.527009	0.35205	0.451323	no
Lus10041321.g	scaffold280:1922283-1927098	q1	q2	OK	13.4644	0.785241	-4.09987	-3.33979	0.00015	0.000724673	yes
Lus10041359.g	scaffold280:2101378-2102950	q1	q2	OK	4.39291	14.0462	1.67693	2.90413	0.0001	0.000505029	yes
Lus10041603.g	scaffold272:877074-893251	q1	q2	OK	23.3527	23.8389	0.0297235	0.0651007	0.90745	0.933327	no
Lus10041689.g	scaffold272:1290526-1298242	q1	q2	OK	19.188	9.61547	-0.996774	-2.38328	5e-05	0.000268796	yes
Lus10041859.g	scaffold272:2084360-2085726	q1	q2	OK	6.75867	15.3248	1.18106	1.86794	0.0023	0.00761752	yes
Lus10041895.g,Lus10041896.g	scaffold272:2235385-2239235	q1	q2	OK	5.74804	23.3984	2.02527	3.54129	5e-05	0.000268796	yes
Lus10041970.g	scaffold123:165293-169400	q1	q2	OK	11.4211	22.2073	0.959337	1.7457	0.003	0.00953426	yes
Lus10042125.g,Lus10042126.g	scaffold123:810709-816795	q1	q2	OK	19.9521	12.3368	-0.693571	-1.19676	0.03455	0.0737621	no
Lus10042156.g	scaffold123:936910-939881	q1	q2	OK	6.17503	13.1208	1.08734	1.87539	0.0008	0.00309402	yes
Lus10042171.g	scaffold123:1023298-1023898	q1	q2	NOTEST	0.0413983	0	#NAME?	0	1	1	no
Lus10042188.g,Lus10042189.g	scaffold123:1116648-1127958	q1	q2	OK	5.29386	5.4447	0.040533	0.0436747	0.9321	0.951473	no
Lus10042190.g	scaffold123:1129599-1133709	q1	q2	OK	8.08993	3.43804	-1.23454	-2.42284	0.00015	0.000724673	yes
Lus10042277.g	scaffold123:1498787-1499534	q1	q2	OK	2.11765	0.366219	-2.53169	-1.68554	0.03055	0.0666431	no
Lus10042348.g	scaffold123:1776048-1780895	q1	q2	OK	13.7428	17.2981	0.331941	0.775651	0.17405	0.264207	no
Lus10042443.g	scaffold123:2162828-2166238	q1	q2	OK	3.11359	5.34274	0.779003	1.39796	0.01725	0.0414815	yes
Lus10042532.g	scaffold67:184378-186806	q1	q2	NOTEST	0.0185922	0	#NAME?	0	1	1	no
Lus10042890.g	scaffold67:2621389-2630986	q1	q2	OK	13.7818	13.9561	0.0181377	0.0435306	0.93905	0.956743	no
Lus10042969.g	scaffold25:354356-360291	q1	q2	OK	8.10106	10.2797	0.343609	0.769468	0.17145	0.261145	no
Lus10043027.g	scaffold25:783475-783853	q1	q2	OK	1.36968	8.01538	2.54893	1.78817	0.02185	0.0505072	no
Lus10043353.g	scaffold25:2488850-2489441	q1	q2	OK	17.0194	48.8934	1.52246	3.01607	5e-05	0.000268796	yes
Lus10043365.g	scaffold25:2547710-2555151	q1	q2	OK	3.89357	1.39656	-1.47922	-2.6232	0.00015	0.000724673	yes
Lus10043426.g	scaffold25:2804729-2806734	q1	q2	OK	31.4367	56.4959	0.845698	1.9211	0.00115	0.00424088	yes
Lus10043428.g	scaffold25:2807652-2817401	q1	q2	OK	3.25096	7.74972	1.25328	1.77997	0.0051	0.0149567	yes
